# Supplementary material for: Are COVID-19 age-mortality curves for 2020 flatter in developing countries? Evidence from a cross-sectional observational study of population-level official death counts and excess deaths estimates
Source: PubMed Central journal article supplement — BMJ Open. 2022 Nov 8;12(11):e061589. doi: 10.1136/bmjopen-2022-061589 (PMC9659715; doi:10.1136/bmjopen-2022-061589), 2022-11-08
Supplement: bmjopen-2022-061589.draft_revisions.pdf [file bmjopen-2022-061589.draft_revisions.pdf]

# BMJ Open

BMJ Open is committed to open peer review. As part of this commitment we make the peer review history of every article we publish publicly available.

When an article is published we post the peer reviewers' comments and the authors' responses online. We also post the versions of the paper that were used during peer review. These are the versions that the peer review comments apply to.

The versions of the paper that follow are the versions that were submitted during the peer review process. They are not the versions of record or the final published versions. They should not be cited or distributed as the published version of this manuscript.

BMJ Open is an open access journal and the full, final, typeset and author-corrected version of record of the manuscript is available on our site with no access controls, subscription charges or pay-per-view fees (<http://bmjopen.bmj.com>).

If you have any questions on BMJ Open's open peer review process please email [info.bmjopen@bmj.com](mailto:info.bmjopen@bmj.com)

# BMJ Open

**Are COVID-19 age-mortality curves for 2020 flatter in developing countries?  
Evidence from official death counts and excess deaths estimates.**

|                               |                                                                                                                                                                                                                                                                                                                                                        |
|-------------------------------|--------------------------------------------------------------------------------------------------------------------------------------------------------------------------------------------------------------------------------------------------------------------------------------------------------------------------------------------------------|
| Journal:                      | <i>BMJ Open</i>                                                                                                                                                                                                                                                                                                                                        |
| Manuscript ID                 | bmjopen-2022-061589                                                                                                                                                                                                                                                                                                                                    |
| Article Type:                 | Original research                                                                                                                                                                                                                                                                                                                                      |
| Date Submitted by the Author: | 31-Jan-2022                                                                                                                                                                                                                                                                                                                                            |
| Complete List of Authors:     | Demombynes, Gabriel; World Bank, Human Development Global Practice de Walque, Damien; World Bank, Development Research Group Gubbins, Paul; World Bank, Human Development Global Practice Urdinola, Piedad ; Universidad Nacional de Colombia - Sede Bogotá, School of Economics Veillard, Jeremy; World Bank Group, Human Development Global Practice |
| Keywords:                     | COVID-19, EPIDEMIOLOGY, PUBLIC HEALTH                                                                                                                                                                                                                                                                                                                  |
|                               |                                                                                                                                                                                                                                                                                                                                                        |

SCHOLARONE™  
Manuscripts

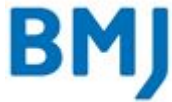

I, the Submitting Author has the right to grant and does grant on behalf of all authors of the Work (as defined in the below author licence), an exclusive licence and/or a non-exclusive licence for contributions from authors who are: i) UK Crown employees; ii) where BMJ has agreed a CC-BY licence shall apply, and/or iii) in accordance with the terms applicable for US Federal Government officers or employees acting as part of their official duties; on a worldwide, perpetual, irrevocable, royalty-free basis to BMJ Publishing Group Ltd ("BMJ") its licensees and where the relevant Journal is co-owned by BMJ to the co-owners of the Journal, to publish the Work in this journal and any other BMJ products and to exploit all rights, as set out in our [licence](#).

The Submitting Author accepts and understands that any supply made under these terms is made by BMJ to the Submitting Author unless you are acting as an employee on behalf of your employer or a postgraduate student of an affiliated institution which is paying any applicable article publishing charge ("APC") for Open Access articles. Where the Submitting Author wishes to make the Work available on an Open Access basis (and intends to pay the relevant APC), the terms of reuse of such Open Access shall be governed by a Creative Commons licence – details of these licences and which [Creative Commons](#) licence will apply to this Work are set out in our licence referred to above.

Other than as permitted in any relevant BMJ Author's Self Archiving Policies, I confirm this Work has not been accepted for publication elsewhere, is not being considered for publication elsewhere and does not duplicate material already published. I confirm all authors consent to publication of this Work and authorise the granting of this licence.

1  
2  
3  
4  
5 **Are COVID-19 age-mortality curves for 2020 flatter in developing countries?**  
6 **Evidence from official death counts and excess deaths estimates.**  
7

8  
9 Gabriel Demombynes<sup>1</sup>, Damien de Walque<sup>2</sup>, Paul Gubbins<sup>1</sup>,  
10  
11 B. Piedad Urdinola<sup>3</sup>, Jeremy Veillard<sup>1</sup>  
12  
13  
14  
15  
16  
17  
18  
19  
20  
21  
22  
23  
24  
25  
26  
27  
28  
29  
30

31  
32 Keywords: COVID-19, Pandemic, Developing Countries, Mortality  
33  
34  
35  
36

37 Corresponding author: Damien de Walque, The World Bank, Development Research Group, The  
38 World Bank. [ddewalque@worldbank.org](mailto:ddewalque@worldbank.org)  
39  
40  
41

42 Affiliations  
43

- 44 1. The World Bank, Human Development Global Practice
- 45 2. The World Bank, Development Research Group
- 46 3. School of Economics at Universidad Nacional de Colombia-Bogotá
- 47
- 48
- 49
- 50
- 51
- 52
- 53
- 54
- 55
- 56
- 57
- 58
- 59
- 60

## Abstract

### *Objectives*

Previous studies have found a pattern of flatter COVID-19 age-mortality curves among low- and middle-income countries using only official COVID-19 death counts. This study examines this question by comparing the age gradient of COVID-19 mortality in a broad set of countries using both official COVID-19 death counts and excess mortality estimates for 2020.

### *Design*

The analysis uses official COVID-19 death counts for 64 countries and excess death estimates for 41 countries. A standardized population analysis was conducted to assess the extent to which variation across countries in the age distribution of COVID-19 deaths was driven by variation in the population age distribution.

### *Results*

A higher share of pandemic-related deaths in 2020 were at younger ages in middle-income countries compared to high-income countries. People under age 65 constituted on average (1) 11 percent of both official deaths and excess deaths in high-income countries, (2) 40 percent of official deaths and 37 percent of excess deaths in upper-middle-income countries, and (3) 54 percent of official deaths in lower-middle-income countries. These contrasting profiles are due only in part to differences in population age structure.

### *Conclusions*

These findings are driven by some combination of variation in age patterns of infection rates and infection fatality rates. They indicate that COVID-19 is not just a danger to older people in developing countries, where a large share of victims are people of working age, who are caregivers and breadwinners for their families.

### Strengths and limitations of this study

- Nearly all studies of the pandemic's age mortality patterns have used only official COVID-19 death data. However, excess deaths at the aggregate population level during the pandemic exceed officially recognized COVID-19 deaths in most countries. It is thus unclear to what extent that flatter age pattern of mortality found in developing countries may have been driven by data reporting issues.
- This study compares the age gradient of COVID-19 mortality in a broad set of countries using both official COVID-19 death counts and excess mortality estimates for 2020. This is to our knowledge the first study that estimates COVID-19 excess mortality by age for a large group of countries.
- This study shows that the same pattern of flatter age mortality curves for developing countries is found using both official COVID-19 death counts and excess mortality estimates, but the available data does not allow ascertaining to what extent the reported differences in the age-specific mortality rates are driven by differences in age-specific cumulative infection rates or in the age-specific cumulative infection fatality rate or both.
- Because of limitations in available mortality data, the analysis includes a large set of high-and-middle income countries but does not include low-income countries.

## Introduction

An important question for understanding the global impact of the COVID-19 pandemic is the disease's age pattern of mortality across countries. Early in the pandemic, case data from COVID-19 patients in mainland China showed that COVID-19 mortality risk increases rapidly with age.<sup>1</sup> This risk profile would tend to limit the death toll in developing countries, which generally have younger populations. But this prediction only holds if the age profile of COVID-19 mortality remains similar across countries.

Our study examines this question by comparing the age gradient of COVID-19 mortality in a broad set of countries using both official COVID-19 death counts and excess mortality estimates for 2020. Vaccine availability was very limited before 2021 and therefore is unlikely to affect the mortality patterns identified in this analysis.

Nearly all studies of the pandemic's age mortality patterns have used only official COVID-19 death data.<sup>2-8</sup> However, excess deaths at the aggregate population level during the pandemic exceed officially recognized COVID-19 deaths in most countries.<sup>9</sup> Other studies have used excess mortality estimates but have mainly focused on estimating changes to life-expectancy without examining the age profile of the COVID-19 impacts on mortality<sup>10-12</sup>. This is to our knowledge the first study that estimates COVID-19 excess mortality by age for a wide swath of countries.

Previous studies have found a pattern of flatter COVID-19 age-mortality curves among low- and middle-income countries (LMICs) using only official COVID-19 death counts.<sup>4,8</sup> It was unclear to what extent that finding may have been driven by data reporting issues. In particular, it is possible that deaths among older people in developing countries have been more likely to be under-attributed to the disease in official COVID-19 death counts. This paper addresses that concern by showing that the same pattern is found using both official COVID-19 death counts and excess mortality estimates.

## Methods

### *Data sources*

The analysis employs two main sources of data:

- 1
- 2
- 3 1. Official reported COVID-19 deaths drawn from the COVERAGE database, with death
- 4 counts aggregated to 5-year age-groups.<sup>13</sup>
- 5
- 6
- 7 2. All-cause deaths by age drawn from national vital statistics records, aggregated in the
- 8 Short-Term Mortality Fluctuations harmonized data series assembled as part of the
- 9 Human Mortality Database.<sup>14</sup>
- 10
- 11
- 12

13 Additional all-cause death data from Colombia, Mexico, Brazil and Peru was obtained from  
14 national statistical offices. Population by age figures for each country from 2020 were taken  
15 from United Nations estimates.<sup>15</sup> A more detailed description of data sources is provided in an  
16 annex.  
17  
18

### 19 *Standardized population*

20  
21 A standardized population analysis was conducted to assess the extent to which variation across  
22 countries in the age distribution of COVID-19 deaths was driven by variation in the population  
23 age distribution. First age-specific mortality rates were calculated by dividing the number of  
24 deaths attributed to COVID-19 for each age group by the population in each age group. These  
25 calculations were conducted for the following age groups: under 45, 45-54, 55-64, 65-74, 75-84,  
26 85 and above. A hypothetical age distribution of deaths for each country was calculated by  
27 multiplying the age-specific COVID-19 mortality rates by corresponding population shares from  
28 the United States. A parallel calculation was carried out using estimates of excess mortality by  
29 age.  
30  
31  
32  
33  
34  
35  
36  
37  
38

### 39 *Excess mortality calculations*

40  
41 Excess mortality methods compare the number of deaths to the number of expected deaths  
42 during a period of interest. Excess mortality is often treated as the “gold standard” in analysis of  
43 COVID-19 mortality.<sup>16</sup> However, there are two issues that are often overlooked in the analysis of  
44 excess mortality.  
45  
46  
47

48  
49 The first issue is that estimates are sensitive to the choice of method. Many COVID-19 excess  
50 mortality calculations have estimated expected deaths as the mean number of deaths over a  
51 corresponding period in previous years. If the number of deaths was trending upward in previous  
52 years, this common approach will over-estimate excess mortality.  
53  
54  
55  
56  
57



This issue is illustrated in Figure 1 for five Latin American countries. All five countries show an increase in the number of annual deaths over 2015-19. Excess death estimates based on predicting expected 2020 deaths using estimated 2015-19 linear trends (red lines) are shown as “Excess 1.” Alternative excess death estimates using a prediction based on the 2015-19 mean death count (blue lines) are shown as “Excess 2.” In all cases, ignoring the increase over time and using the historical mean to calculate expected deaths would result in substantial overestimation of excess deaths.

For the analysis in this paper, expected deaths are estimated using a simple regression using 2015-2019 historical data, run separately by country and age-group, where observed deaths are modeled as a linear function of year and an error term.

The second issue often neglected in COVID-19 excess mortality discussions is that excess mortality represents a combination of effects. Specifically,

*Net excess deaths* =

$$[Direct\ COVID-19\ deaths] + [Indirect\ COVID-19\ deaths] - [Averted\ deaths]$$

*Direct COVID-19 deaths* are those due to infection with the virus. *Indirect COVID-19 deaths* are those due in part to factors such as congestion in the health system, delays in care-seeking, or mental health issues caused by the pandemic. *Averted deaths* are those that would have taken place in the absence of the pandemic but did not occur as a result of pandemic-induced measures. These could include deaths due to other infectious diseases, violence, or traffic injuries that were avoided due to voluntary or mandated social distancing. The possibility of non-zero indirect deaths and averted deaths makes the interpretation of excess deaths more complex than is often recognized.

*Slope calculation*

The shape of an age-mortality curve can be summarized in terms of the percent rate of increase in probability of death per year of additional age after age 45, calculated by fitting a line to the age-specific mortality rates as follows:

$$\log(r(x,i)) = \alpha_i + \beta_i x$$

where the age-specific mortality rate is  $r(x,i) = \frac{D(x,i)}{N(x,i)}$  for the ten-year age group age  $x$  to age  $x + 9$ , ( $x = 45, 55, 65, 75, 85$ ) in country  $i$ ,  $D(x,i)$  is the number of deaths in the age group and  $N(x,i)$  is the population of the age group in country  $i$ .<sup>1</sup> The  $x = 85$  points correspond to the group consisting of all ages 85 and above.

To take into account the varying age structure across countries within this open interval, an adjustment factor based on indirect standardization was calculated. Following Goldstein and Lee (2020)<sup>17</sup>, the indirect standardization was calculated using 2020 both-sex mortality from the United States as the standard mortality schedule  ${}_5M_x^s$  by three 5-year age groups consisting of ages 85-89, 90-94, and 95-99. We define the share of each population  $k$  for each group  $c_{x,k}$  such that  $1 = \sum_x c_{y,k}$ , summing up over the three 5-year age groups and where the shares for the United States age structure are referred to by  $c_{x,R}$ . The adjustment for population  $k$  is as follows:

$$\frac{\sum_x c_{x,R} {}_5M_x^s}{\sum_x c_{x,k} {}_5M_x^s}$$

These adjustment factors were multiplied by the observed age-specific COVID-19 mortality rates (and separately the estimated age-specific excess mortality rates) for the open interval 85+.

The coefficients,  $\beta_i$ , are the rates of increase per year of age in probability of death. This calculation was performed first defining  $D(x,i)$  in terms of official COVID-19 counts by age for each country for which data was available. The calculation was also performed for each country defining  $D(x,i)$  using excess mortality estimates by age as described in the previous section.<sup>2</sup> These results provide 1) the slope of the COVID-19 age-mortality curve according to official counts, and 2) the slope of the age-mortality curve for excess deaths.

### Patient and public involvement

The study presents analysis of secondary data. There was no patient and public involvement.

### Results

<sup>1</sup> The slope is fitted starting at age 45 because there are few deaths in most countries below age 45.

<sup>2</sup> In cases for which estimated excess deaths were zero or less, the value was coded as 0.001 in order to calculate logarithms.

1  
2  
3 The left side of Figure 2 shows the age distribution of officially recorded COVID-19 deaths in  
4 2020 by country and the age distribution of excess deaths. According to official reports, on  
5 average across high-income countries, just 11 percent of deaths were among those under age 65.<sup>3</sup>  
6  
7 In contrast, people under 65 constituted on average 40 percent of official COVID-19 deaths in  
8 upper-middle-income countries and 54 percent of deaths in lower-middle-income countries. The  
9 same pattern is observed using the distribution of excess deaths by age, shown on the right side  
10 of Figure 2. In high-income countries, those under 65 are also 11 percent of excess deaths. For  
11 the upper-middle-income countries for which data is available (Peru, Colombia, and Mexico),  
12 the age profiles of excess deaths are similar to those of official COVID-19 deaths, and those  
13 under age 65 account for on average 37 percent of excess deaths.<sup>4</sup>  
14  
15  
16  
17  
18  
19  
20

21 Figure 3 shows the hypothetical age distribution of COVID-19 deaths according to official  
22 reports, as well as excess deaths, applying the United States standardized age distribution. This  
23 controls for the differing population age distributions across countries. Unsurprisingly in low-  
24 and middle-income countries, which have younger populations than the United States, the  
25 hypothetical distribution shows an older profile of deaths as compared to the actual distribution.  
26 However, the pattern of a younger profile of deaths in less wealthy countries remains, both with  
27 official data and with excess mortality data. The numbers shown in Figures 2 and 3 can also be  
28 found in Appendix Tables A1 and A2.  
29  
30  
31  
32  
33  
34

35 Notably the United States has a much younger profile of death—using both official COVID-19  
36 death counts and excess mortality—than countries with similar income levels. This is the case  
37 even after controlling for differences in population age distribution. The age distribution of  
38 deaths in the United States is roughly similar to that of Chile. In both countries, 27 percent of  
39 excess deaths were among those under age 65.  
40  
41  
42  
43  
44

45 Figure 4 presents a visual representation of all the mortality rates by age group across all  
46 countries and economies with available data. The vertical axis represents mortality rates per  
47  
48  
49

---

50 <sup>3</sup> Note that all countries in Figure 2 from Chile downward with the exception of Turkey on the figure are classified  
51 as high-income countries. Turkey is classified as an upper-middle-income country. Bangladesh, India, the  
52 Philippines, Jordan, and Indonesia are lower-middle-income countries. World Bank classifications are based on GNI  
53 calculated by the Atlas method while the figure uses GNI calculated with purchasing power parity exchange rates.

54 <sup>4</sup> Data is also available to produce excess death estimates by age for Brazil, but not with our preferred age group  
55 breakdown.  
56  
57

1  
2  
3 100,000, and it is important to note that the scale varies widely across countries, reflecting the  
4 different levels of exposure to the pandemic and to its related mortality across the globe. Overall,  
5 mortality rates increase with age, albeit with different gradients. With the excess mortality data, a  
6 few deviations from this gradient are likely due to the relatively low mortality as well as the  
7 overall small number of deaths (e.g. Iceland). Australia, New Zealand and Taiwan, China have  
8 close to zero official COVID-19 deaths and show negative estimates of excess mortality rates,  
9 especially for the older age groups, likely reflecting averted deaths due to isolation policies.

10  
11  
12  
13  
14  
15  
16 Figure 5 shows a more detailed comparison of results for five Latin American countries and the  
17 United States, using the same log scale for all countries. To add perspective on the extent of  
18 COVID-19 related mortality compared to what might have been the mortality experience in the  
19 absence of the COVID-19 pandemic, each figure adds in grey the expected all-cause mortality  
20 for 2020, based on levels and trends in the 5 preceding years. For each country, the figure also  
21 reports the total cumulative deaths for 2020 using both official COVID-19 deaths and excess  
22 mortality. Points for the age group 0-14 are not shown because for that age group official  
23 COVID-19 death rates are very low and excess mortality rates are negative for all countries  
24 shown.

25  
26  
27  
28  
29  
30  
31  
32 Official COVID-19 death counts are higher than excess-mortality estimates in many cases. This  
33 is the case for most age groups in Brazil, the oldest age group in Chile, all but the oldest age  
34 group in Peru, and all age groups in Colombia. These patterns indicate that for these country-age  
35 group combinations, the number of deaths averted due to the pandemic exceeds the sum of direct  
36 and indirect COVID-19 deaths. This could have occurred, for example, because a decline in  
37 driving and exposure to violence during lockdowns and a reduction in transmission of other  
38 infectious diseases as a result of pandemic precautions.

39  
40  
41  
42  
43  
44  
45 In Mexico, the mortality estimates using excess deaths is consistently higher than using the  
46 official COVID-19 death count, and the gap between both measures increases with age. In the  
47 United States, mortality estimates using excess deaths are also higher than using official COVID-  
48 19 deaths, but that difference decreases with age and becomes minimal for older age groups. The  
49 especially extreme impact of the pandemic in Peru is evident in Figure 5. Among those ages 45-  
50 74, both deaths attributed to COVID-19 and excess deaths exceeded total expected all-cause  
51 mortality for 2020.

1  
2  
3 Another notable pattern evident in Figure 5 is the large gap between the two measures for the  
4 United States at younger age groups. For the 15-44 age group, the excess death estimate is four  
5 times the official COVID-19 death count. Given that testing of patients with COVID-19  
6 symptoms has been widespread in the United States in all but the early stages of the pandemic,  
7 the jump in excess mortality among young people most likely reflects indirect COVID-19 deaths.  
8  
9

10  
11  
12 Figure 6a explores how the slope of the age-mortality gradient for each country varies with its  
13 level of income. More precisely, it shows the exponential rate of increase in mortality by age in  
14 percent per year starting at age 45 against 2019 GNI per capita (the numbers for the estimated  
15 rates of increase are available in Appendix Table A3). The left panel presents this plot for the 64  
16 countries with official COVID-19 deaths data and the right displays the corresponding plot for  
17 the 33 countries with excess deaths estimates available for a consistent set of age-groups as  
18 follows: 45-54, 55-64, 65-74, 75-84, 85+. Using all available data, we find that the increase in  
19 mortality risk with each additional year of age above 45 typically ranges (IQR) from 7.9 to 12.2  
20 percent (median = 10.9) using excess deaths and 6.6 to 12.6 percent (median = 9.2) using official  
21 deaths.  
22  
23  
24  
25  
26  
27  
28  
29

30 Both plots show a positive association between income per capita and the age-mortality gradient,  
31 indicating that COVID-19 mortality increases more steeply for older age groups in richer  
32 countries. Using official death rate data, across countries the rate of increase of mortality risk per  
33 year of age rises by 0.14 percent for each US\$1,000 of GNI. Using excess mortality data, it rises  
34 by 0.21 percent for each US\$1,000 of GNI.  
35  
36  
37  
38  
39

40 To verify that this observed association is not driven by the composition of both sets of  
41 countries/economies, Figure 6b repeats the same exercise with the common set of 25  
42 countries/economies. The conclusions taken from Figures 6a and b are similar: COVID mortality  
43 is more concentrated among older individuals in richer countries. With the more limited set of  
44 countries the gradient is less steep and more consistent between the methods for estimating  
45 mortality. Using official death rate data, across countries the rate of increase of mortality risk per  
46 year of age rises by 0.12 percent for each US\$1,000 of GNI. Using excess mortality data, it rises  
47 by 0.10 percent for each US\$1,000 of GNI.  
48  
49  
50  
51  
52  
53  
54

## 55 Discussion

56  
57  
58  
59  
60

1  
2  
3 The age profile of COVID-19 mortality risk in 2020 was flatter (with relatively higher mortality  
4 at younger ages) in countries with lower incomes. This pattern is found using official COVID-19  
5 death data from a large set of countries as well as excess mortality from a smaller set of countries  
6 which include high-income countries plus Colombia, Mexico, and Peru. Our analysis concerns  
7 the year 2020 and is therefore unaffected by the arrival of COVID-19 vaccines and their unequal  
8 distribution across countries.  
9

10  
11  
12  
13  
14 The findings in this paper can provide the basis for a more comprehensive accounting of the  
15 impact of COVID-19. For example, the younger mortality profile in developing countries means  
16 that in those countries the pandemic has killed large numbers of people who were of working  
17 age, many of whom were their families' breadwinners. Earlier global estimates suggest that more  
18 than 1.5 million children have experienced the death of at least one caregiver as a consequence  
19 of the pandemic.<sup>18</sup> This raises the concern that long-term impacts via lower investments in  
20 human capital of orphaned children will be particularly deep in developing countries. This is  
21 highly worrisome given the already massive declines in school enrollment and learning losses  
22 generated by the pandemic in developing countries.<sup>19–21</sup>  
23  
24  
25  
26  
27  
28  
29

30 A full understanding of age-specific patterns of excess mortality will require country-by-country  
31 analysis using cause-of-death data, where available, to pull apart estimates of direct COVID-19  
32 deaths, indirect COVID-19 deaths, and averted deaths. A brief comparison of Colombia and the  
33 United States highlights how components of excess mortality can vary widely by country. In  
34 Colombia, both vehicular and homicide deaths fell during the country's lockdown, reducing its  
35 excess mortality count. For 2020 vehicular deaths dropped 18.2 percent, and the number of  
36 homicides fell 5.4 percent, causing Colombia's murder rate to reach its lowest level since  
37 1979.<sup>22,23</sup> In contrast, the United States excess mortality estimate for 2020 reflects in part a 7.2  
38 percent increase in motor vehicle deaths, a 29.4 percent increase in homicides, and a 30.0 percent  
39 spike in drug overdose deaths.<sup>24–26</sup>  
40  
41  
42  
43  
44  
45  
46  
47

48 Official COVID-19 death reports and excess mortality estimates show broadly similar age  
49 patterns country-by-country. This finding, along with the fact that direct COVID-19 deaths  
50 account for the large share of excess mortality, suggests that the flatter profile of excess mortality  
51 in lower income countries is driven principally by direct COVID-19 deaths. To consider drivers  
52 of the direct COVID-19 age pattern it is useful to note that the age-specific mortality rate is the  
53  
54  
55  
56  
57



product of the age-specific cumulative infection rate (*IR*) and the age-specific cumulative infection fatality rate (*IFR*). Using the notation employed earlier and where  $I(x,i)$  designates the cumulative number of infections of age group  $x$  in country  $i$ , this can be expressed as follows:

$$r(x,i) = \frac{D(x,i)}{N(x,i)} = \frac{I(x,i)}{N(x,i)} * \frac{D(x,i)}{I(x,i)}$$

$$= IR(x,i) * IFR(x,i)$$

The greater flatness of direct COVID-19 age-specific mortality rates in lower income countries could result from differing patterns across countries by age of *IR*, *IFR*, or both. A number of studies have documented possible contributing factors to variation across countries in overall COVID-19 mortality and those same factors could generate different patterns in mortality by age.<sup>27-31</sup>

The relative *IR* of younger vs. older people may vary across countries for many reasons. First, in lower income countries, a large share of the population cannot work remotely.<sup>32</sup> Second, in developing countries, a lower share of older people are long-term care facility residents, who are at high risk for infection and death. One-quarter of recognized COVID-19 deaths during the first few months of the pandemic in the United Kingdom were residents of care facilities, and 31 percent of recognized COVID-19 deaths in the United States as of June 1, 2021 were care facility residents or staff.<sup>33,34</sup> Both of these characteristics of developing countries would tend to increase the relative risk of infection for younger people. On the other hand, in low- and middle-income countries, intergenerational households are more common. This means older people are more exposed to infection risk, particularly because in those countries people are more likely to live in crowded conditions. Roughly 20 percent of households in LMICs have at least one household member under age 20 and one over age 60, as compared to just 5 percent in high-income countries.<sup>35</sup> In 54 LMICs with recent Demographic and Health Surveys, just half of the households have no more than two people per sleeping room.<sup>230</sup>

Among those infected, age-specific *IFRs* may vary by age due to many different factors. One systematic review found that overall *IFRs* in developing countries are 1.3-2.5 times higher than in high-income countries.<sup>36</sup> Country-level factors like the profile of comorbidities, differences in health system capacity, quality of care, infection prevention and control practices, and availability of personal protective equipment, could have age-specific effects on the *IFR*.<sup>31,37</sup> A

1  
2  
3 form of survivor bias may be a factor as well. High quality medical care in wealthier countries  
4 keeps many older people alive despite weak health conditions that make them vulnerable to  
5 COVID-19. It may be that older people in developing countries are on average healthier than  
6 those in wealthier countries because those with ailments would have been at high risk for death  
7 at younger ages. If this is the case, older people in developing countries might be more resilient  
8 to the disease.  
9

10  
11  
12  
13  
14 Distinguishing various explanations for the observed age patterns of mortality identified in this  
15 paper should be a topic for further research. The analysis in this paper is also a reminder of the  
16 value of demographic data and in particular vital statistics as a tool amid the COVID-19 crisis.  
17 Excess mortality analysis by age presented here is only possible for countries that have well-  
18 functioning vital statistics systems and that have made their data widely available. Investments in  
19 vital statistics systems and greater data transparency should be encouraged as a global public  
20 good.  
21  
22  
23  
24  
25  
26  
27  
28  
29  
30  
31  
32  
33  
34  
35  
36  
37  
38  
39  
40  
41  
42  
43  
44  
45  
46  
47  
48  
49  
50  
51  
52  
53  
54  
55  
56  
57  
58  
59  
60



## Acknowledgments

The authors express appreciation to Joshua Goldstein, Young Eun Kim, Ronald D. Lee, Norman Loayza, Andrew Noymer, Robert Oelrichs, Sharon Piza, and Philip Schellekens for helpful suggestions. The findings, interpretations, and conclusions in this paper are entirely those of the authors. They do not necessarily represent the views of the International Bank for Reconstruction and Development/World Bank and its affiliated organizations, or those of the Executive Directors of the World Bank or the governments they represent and are not intended to make any judgment on the legal or other status of geographic areas, or to prejudice the determination of any claims with respect to such area.

## Funding

None

## Author information

Affiliations

### *The World Bank, Human Development Global Practice*

Gabriel Demombynes ([gdemombynes@worldbank.org](mailto:gdemombynes@worldbank.org)), Paul Gubbins ([paul.gubbins@gmail.com](mailto:paul.gubbins@gmail.com)),  
Jeremy Veillard ([jveillard@worldbank.org](mailto:jveillard@worldbank.org))

### *The World Bank, Development Research Group*

Damien de Walque ([ddewalque@worldbank.org](mailto:ddewalque@worldbank.org))

### *School of Economics at Universidad Nacional de Colombia-Bogotá*

B. Piedad Urdinola ([bpurdinolac@unal.edu.co](mailto:bpurdinolac@unal.edu.co))

## Data availability statement

The data availability section in the online appendix describes the data sources used for this study. Upon acceptance a link to Github repository will be made available to facilitate replication.

## Author Contributions

The study and the methodology were conceived by all authors. GD and PG conducted the formal analysis and validated the results. All authors collaborated on writing the paper.

## Ethics Declaration

Ethics approval was not sought as the study presents results of an analysis of secondary data and does not involve human participants.

## Competing interests

The authors declare no competing interests.

1  
2  
3  
4  
5  
6  
7  
8  
9  
10  
11  
12  
13  
14  
15  
16  
17  
18  
19  
20  
21  
22  
23  
24  
25  
26  
27  
28  
29  
30  
31  
32  
33  
34  
35  
36  
37  
38  
39  
40  
41  
42  
43  
44  
45  
46  
47  
48  
49  
50  
51  
52  
53  
54  
55  
56  
57  
58  
59  
60

For peer review only

## References

1. Verity, R. *et al.* Estimates of the severity of coronavirus disease 2019: a model-based analysis. *Lancet Infect. Dis.* 2020: **20**, 669–677.
2. Sasson, I. Age and COVID-19 mortality: A comparison of Gompertz doubling time across countries and causes of death. *Demogr. Res.* 2021: **44**, 379–396.
3. Sasson, I. Aging and COVID-19 mortality: A demographic perspective. *medRxiv* 2020.
4. Demombynes, G. COVID-19 Age-Mortality Curves Are Flatter in Developing Countries. World Bank Policy Research Working Paper. 2020. 9313.
5. Shapiro, V. COVID-19 Outbreaks and Age Mortality Patterns. 2020.
6. Goldstein, J. R. & Lee, R. D. Demographic perspectives on the mortality of COVID-19 and other epidemics. *Proc. Natl. Acad. Sci.* 2020: **117**, 22035–22041.
7. Sudharsanan, N., Didzun, O., Bärnighausen, T. & Geldsetzer, P. The Contribution of the Age Distribution of Cases to COVID-19 Case Fatality Across Countries: A Nine-Country Demographic Study. *Ann. Intern. Med.* 2020:**173**, 714–720.
8. Chauvin, J. P., Folwer, A. & Herrera, L. N. The Younger Age Profile of Covid-19 Deaths in Developing Countries. 2020. *Washington DC*.
9. Karlinsky, A. & Kobak, D. Tracking excess mortality across countries during the COVID-19 pandemic with the World Mortality Dataset. *Elife* 2021:**10**, e69336.
10. Aburto, J.M., Jonas Schöley, Ilya Kashnitsky, Luyin Zhang, Charles Rahal, Trifon I Missov, Melinda C Mills, Jennifer B Dowd, Ridhi Kashyap, Quantifying impacts of the COVID-19 pandemic through life-expectancy losses: a population-level study of 29 countries, *International Journal of Epidemiology*, 2021,

- 1  
2  
3 11. Islam N, Jdanov D A, Shkolnikov V M, Khunti K, Kawachi I, White M et al. Effects of  
4 covid-19 pandemic on life expectancy and premature mortality in 2020: time series analysis in  
5 37 countries *BMJ* 2021: 375:e066768  
6  
7
- 8  
9  
10 12. Castro, M.C., Gurzenda, S., Turra, C.M. *et al.* Reduction in life expectancy in Brazil after  
11 COVID-19. *Nat Med* 2021: **27**, 1629–1635.  
12  
13
- 14  
15 13. Riffe, T., Acosta, E., & the COVERAGE-DB team. Data Resource Profile: COVERAGE-  
16 DB: a global demographic database of COVID-19 cases and deaths. *Int. J. Epidemiol.* 2021:  
17 **50**, 390–390f.  
18  
19
- 20  
21 14. Jdanov, D. A. *et al.* The short-term mortality fluctuation data series, monitoring mortality  
22 shocks across time and space. *Sci. Data* 2021: **8**, 235.  
23  
24
- 25  
26 15. DESA, U. World Population Prospects 2019. United Nations. Department of Economic  
27 and Social Affairs. 2019. *World Popul. Prospects 2019*.  
28  
29
- 30  
31 16. Beaney, T. *et al.* Excess mortality: the gold standard in measuring the impact of COVID-  
32 19 worldwide? *J. R. Soc. Med.* 2020: **113**, 329–334.  
33  
34
- 35  
36 17. Goldstein, J. R. & Lee, R. D. Demographic perspectives on the mortality of COVID-19  
37 and other epidemics. *Proc. Natl. Acad. Sci.* 2020: **117**, 22035–22041.  
38  
39
- 40  
41 18. Hillis, S. D. *et al.* Global minimum estimates of children affected by COVID-19-  
42 associated orphanhood and deaths of caregivers: a modelling study. *The Lancet* 2021: **398**,  
43 391–402.  
44  
45
- 46  
47 19. Bundervoet, T., Dávalos, M. E. & Garcia, N. *The Short-Term Impacts of COVID-19 on*  
48 *Households in Developing Countries: An Overview Based on a Harmonized Data Set of High-*  
49 *Frequency Surveys*. The World Bank, 2021. doi:10.1596/1813-9450-9582.  
50  
51  
52  
53  
54  
55  
56  
57

- 1  
2  
3 20. Miguel, E. & Mobarak, A. M. The Economics of the COVID-19 Pandemic in Poor  
4 Countries. *Annu. Rev. Econ.* 2021 doi:[https:// doi.org/10.1146/annurev-economics-051520-](https://doi.org/10.1146/annurev-economics-051520-025412)  
5  
6  
7 025412.  
8  
9
- 10 21. Azevedo, J. P., Hasan, A., Goldemberg, D., Geven, K. & Iqbal, S. A. Simulating the  
11 potential impacts of COVID-19 school closures on schooling and learning outcomes: A set of  
12 global estimates. *World Bank Res. Obs.* 2021: **36**, 1–40.  
13  
14
- 15 22. Departamento Administrativo Nacional de Estadística. Cuadros unificados: Defunciones  
16 no fatales cifras definitivas 2019. 2020.  
17  
18
- 19 23. Departamento Administrativo Nacional de Estadística. Cuadros unificados: Defunciones  
20 no fatales acumulado año 2020pr. 2021.  
21  
22
- 23 24. National Center for Statistics and Analysis. Early Estimate of Motor Vehicle Traffic  
24 Fatalities in 2020. 2021.  
25  
26
- 27 25. Krishnakumar, P. Murders rose sharply in 2020 but data is lacking across much of the  
28 country. 2021.  
29  
30
- 31 26. National Center for Health Statistics. Provisional Drug Overdose Death Counts. 2021.  
32  
33
- 34 27. Schellekens, I. G. and P. COVID-19 is a developing country pandemic. *Brookings*  
35 [https://www.brookings.edu/blog/future-development/2021/05/27/covid-19-is-a-developing-](https://www.brookings.edu/blog/future-development/2021/05/27/covid-19-is-a-developing-country-pandemic/)  
36 [country-pandemic/](https://www.brookings.edu/blog/future-development/2021/05/27/covid-19-is-a-developing-country-pandemic/) (2021).  
37  
38
- 39 28. Schellekens, P. & Sourrouille, D. M. COVID-19 Mortality in Rich and Poor Countries: A  
40 Tale of Two Pandemics? World Bank Policy Research Working Paper 2020: 9260.  
41  
42  
43  
44
- 45 29. Walker, P. G. *et al.* The impact of COVID-19 and strategies for mitigation and  
46 suppression in low-and middle-income countries. *Science* 2020: 369, 413–422 2020.  
47  
48  
49  
50  
51  
52  
53  
54  
55  
56  
57

- 1  
2  
3 30. Brown, C. S., Ravallion, M. & van de Walle, D. *Can the World's Poor Protect*  
4  
5 *Themselves from the New Coronavirus?* 2020.  
6  
7  
8 31. Ghisolfi, S. *et al.* Predicted COVID-19 fatality rates based on age, sex, comorbidities and  
9  
10 health system capacity. *BMJ Glob. Health* 2020; **5**, e003094.  
11  
12 32. Garrote Sanchez, D. *et al.* Who on earth can work from home? 2020.  
13  
14 33. Public Health England. *Disparities in the risk and outcomes of COVID-19.* 2020.  
15  
16 34. The New York Times, Nearly One-Third of U.S. Coronavirus Deaths Are Linked to  
17  
18 Nursing Homes. *The New York Times.* 2020.  
19  
20 35. Winskill, P. *et al.* *Report 22: Equity in response to the COVID-19 pandemic: an*  
21  
22 *assessment of the direct and indirect impacts on disadvantaged and vulnerable populations in*  
23  
24 *low-and lower middle-income countries WHO Collaborating Centre for Infectious Disease*  
25  
26 *Modelling MRC Centre for Global Infectious Disease Analysis.* 2020.  
27  
28  
29 36. Levin, A. *et al.* Assessing the Burden of COVID-19 in Developing Countries: Systematic  
30  
31 Review, Meta-Analysis, and Public Policy Implications. *medRxiv* 2021.09.29.21264325  
32  
33 doi:10.1101/2021.09.29.21264325.  
34  
35  
36  
37 37. Nepomuceno, M. R. *et al.* Besides population age structure, health and other  
38  
39 demographic factors can contribute to understanding the COVID-19 burden. 2020. *Proc. Natl.*  
40  
41 *Acad. Sci.* **117**, 13881–13883.  
42  
43  
44  
45  
46  
47  
48  
49  
50  
51  
52  
53  
54  
55  
56  
57  
58  
59  
60

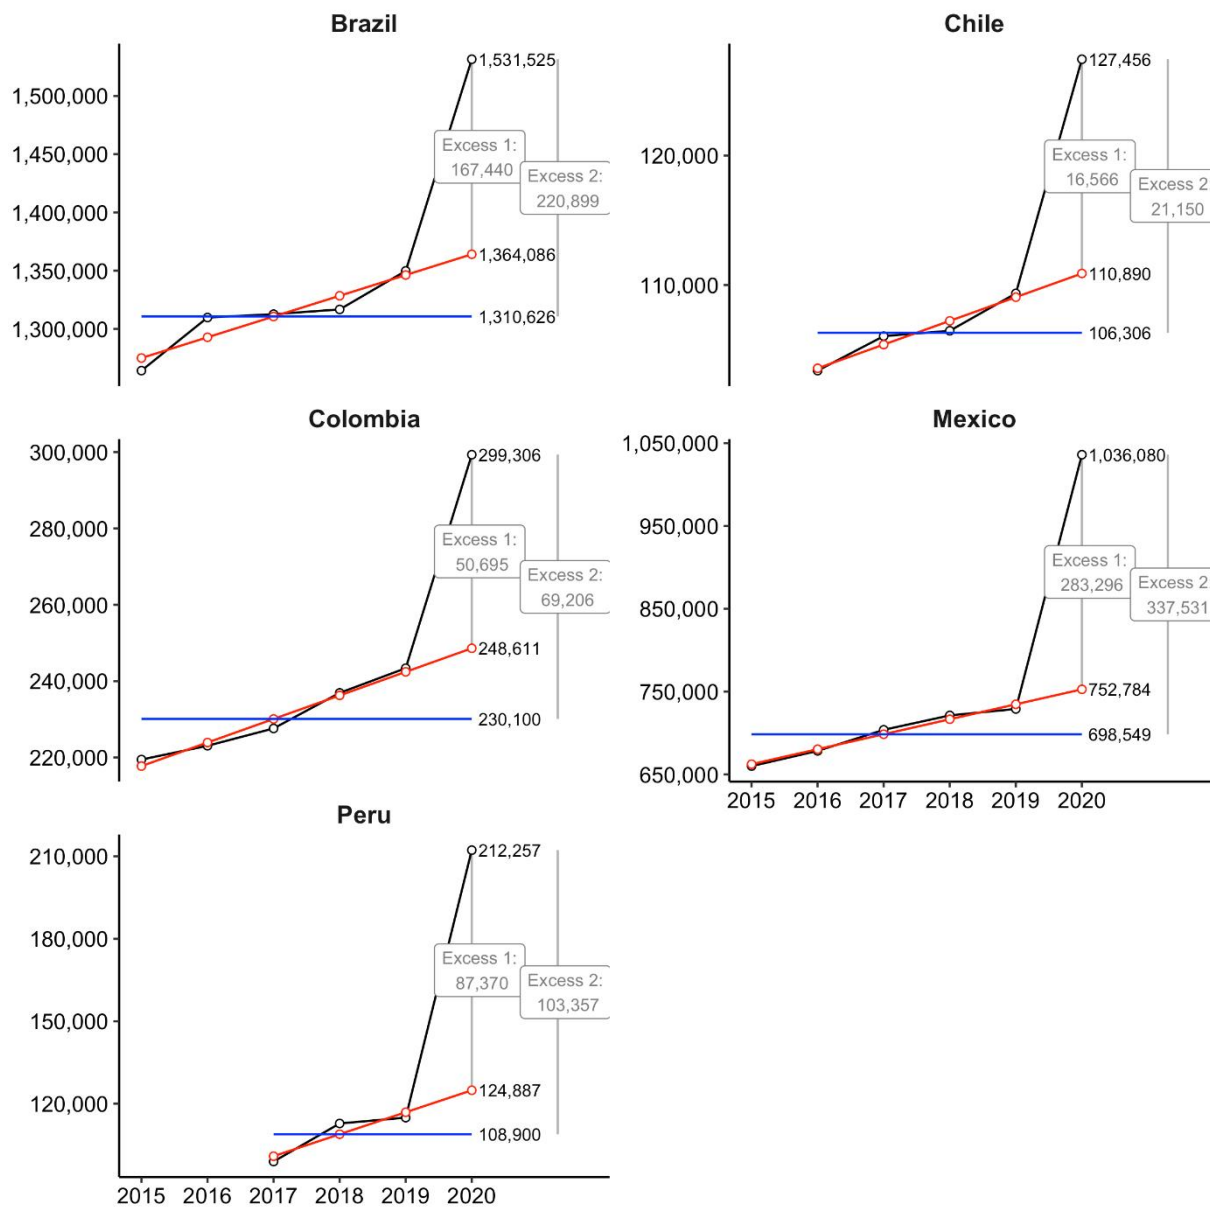

Notes: Actual deaths are shown in black. Predicted deaths based on a linear projection using annual mortality totals 2015-19 are shown in red. Mean deaths 2015-19 are shown in blue.

Figure 1: Actual and predicted total deaths (all causes) by year, select countries

1  
2  
3  
4  
5  
6  
7  
8  
9  
10  
11  
12  
13  
14  
15  
16  
17  
18  
19  
20  
21  
22  
23  
24  
25  
26  
27  
28  
29  
30  
31  
32  
33  
34  
35  
36  
37  
38  
39  
40  
41  
42  
43  
44  
45  
46  
47  
48  
49  
50  
51  
52  
53  
54  
55  
56  
57  
58  
59  
60

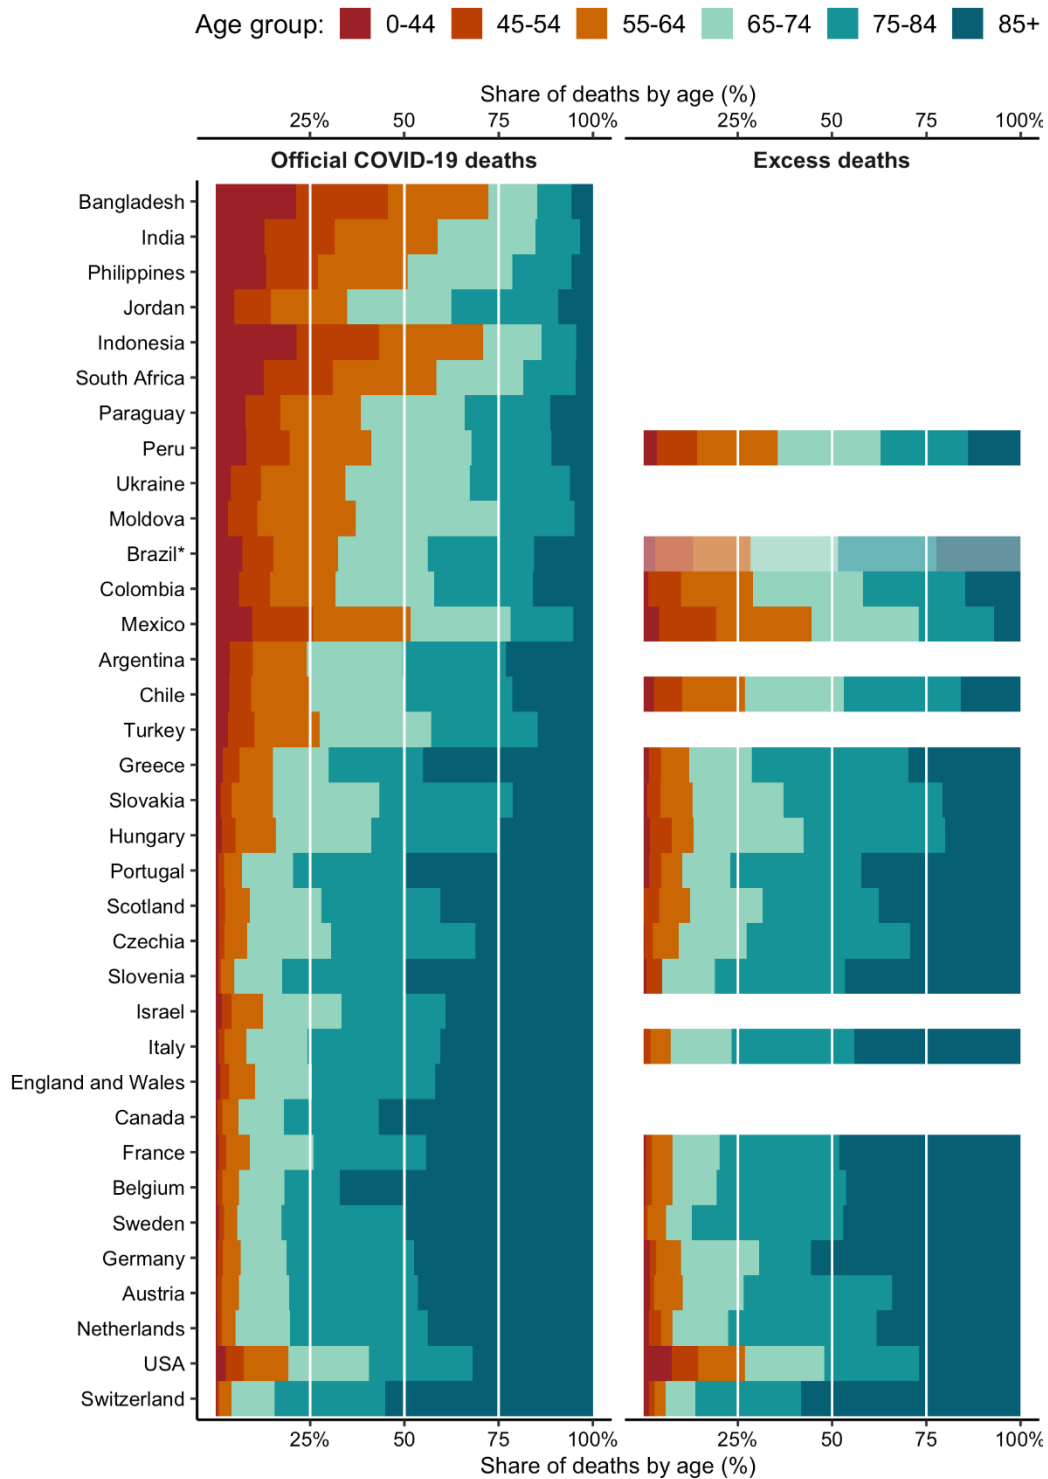

\*The age-groups available to compute excess deaths for Brazil differ from those used in other countries and correspond to the following: 0-39, 40-49, 50-59, 60-69, 70-79, 80+

Notes: Countries with fewer than 2000 official COVID-19 deaths are excluded. Country-age group combinations with negative excess deaths are shown as zeroes. Countries are sorted by 2019 GNI per capita (PPP).

Figure 2: Age distribution of official COVID-19 deaths and excess deaths in 2020



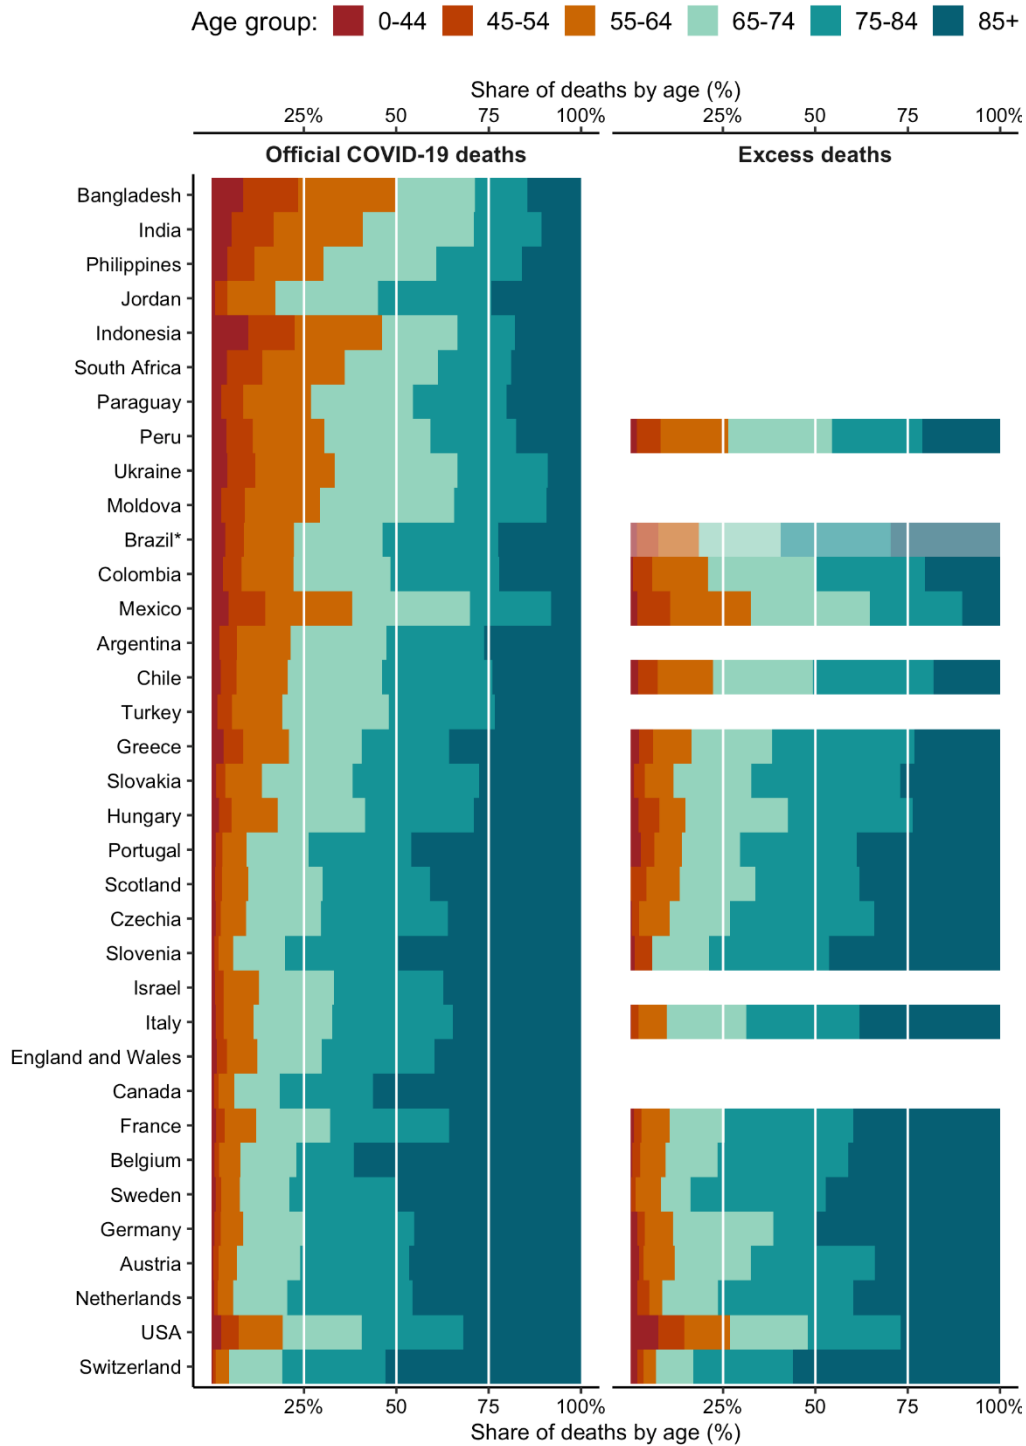

\*The age-groups available to compute excess deaths for Brazil differ from those used in other countries and correspond to the following: 0-39, 40-49, 50-59, 60-69, 70-79, 80+

Notes: Countries with fewer than 2000 official COVID-19 deaths are excluded. Country-age group combinations with negative excess deaths are shown as zeroes. Countries are sorted by 2019 GNI per capita (PPP).

Figure 3: Hypothetical age distribution of official COVID-19 and excess deaths in 2020, using country age-specific mortality rates and the US population age distribution

Source of death data: ○ Official COVID-19 deaths ○ Vital statistics (Excess deaths)

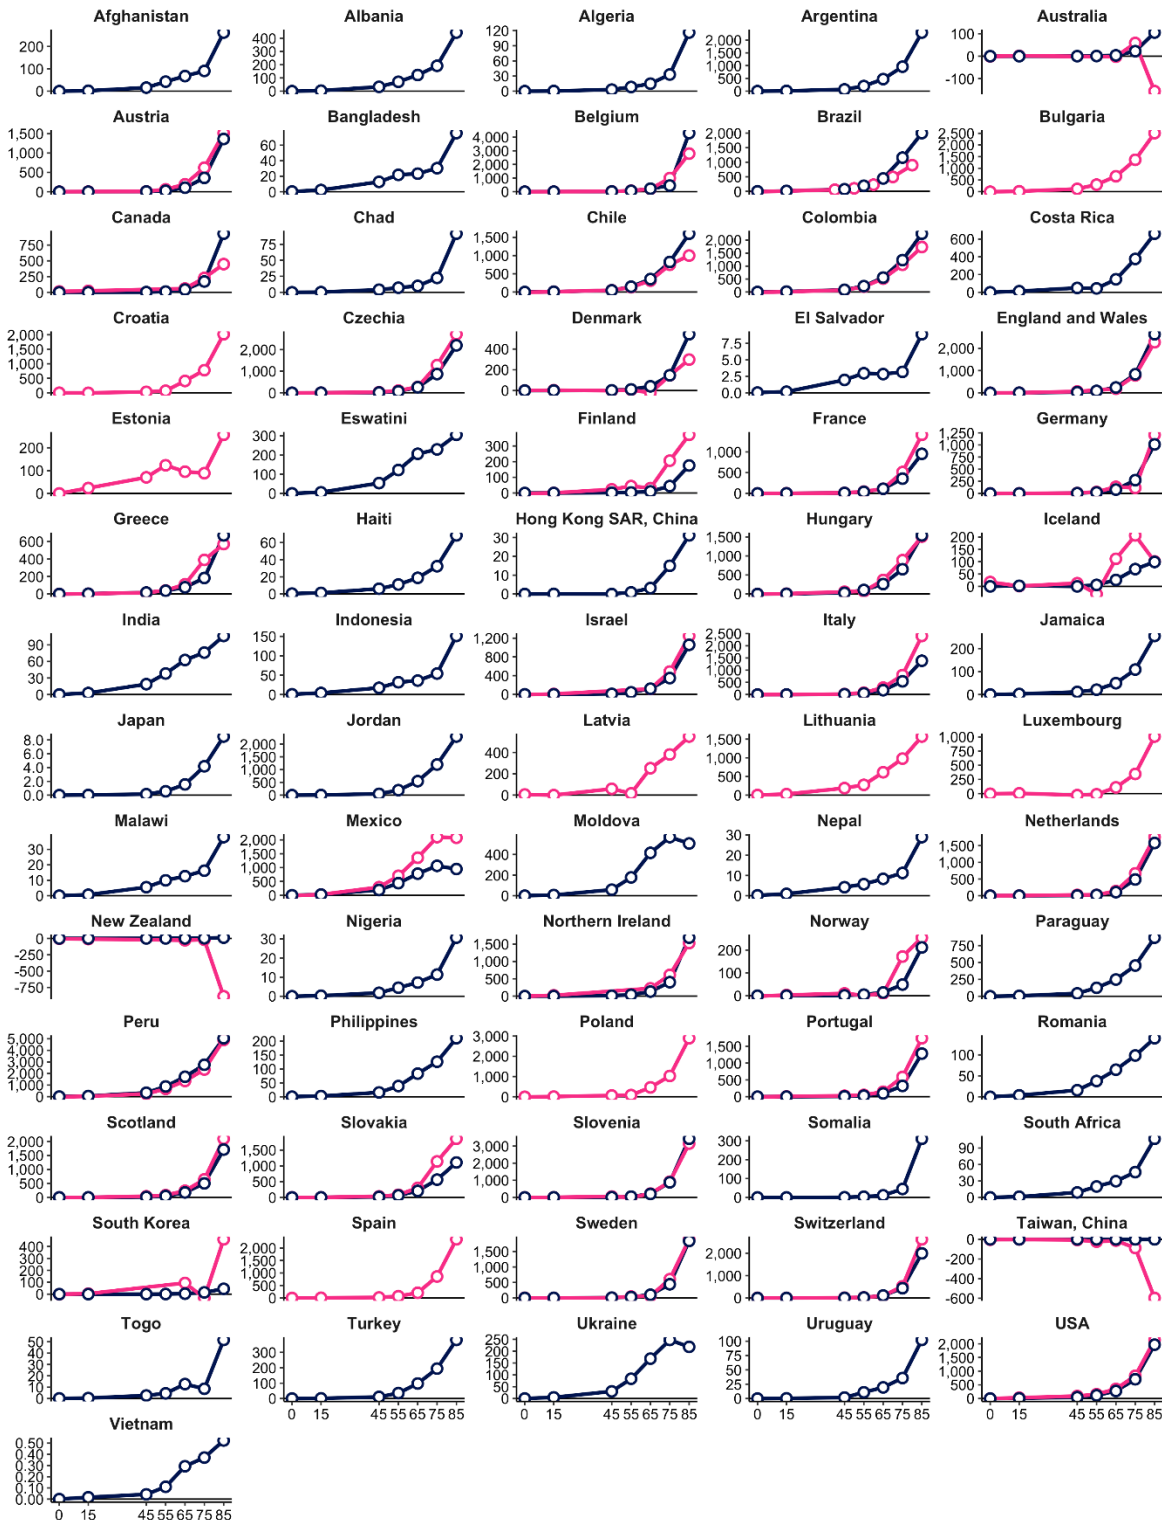

Note: Points are plotted at the start of each age group: 0-14, 15-44, 45-54, 55-64, 65-74, 75-84, 85+  
 Figure 4: Official COVID-19 vs excess deaths by age group (per 100,000 population)

Log scale

Source of death data: ● Official COVID-19 deaths ○ Vital statistics (Expected all cause mortality rate)  
 ● Vital statistics (Excess deaths)

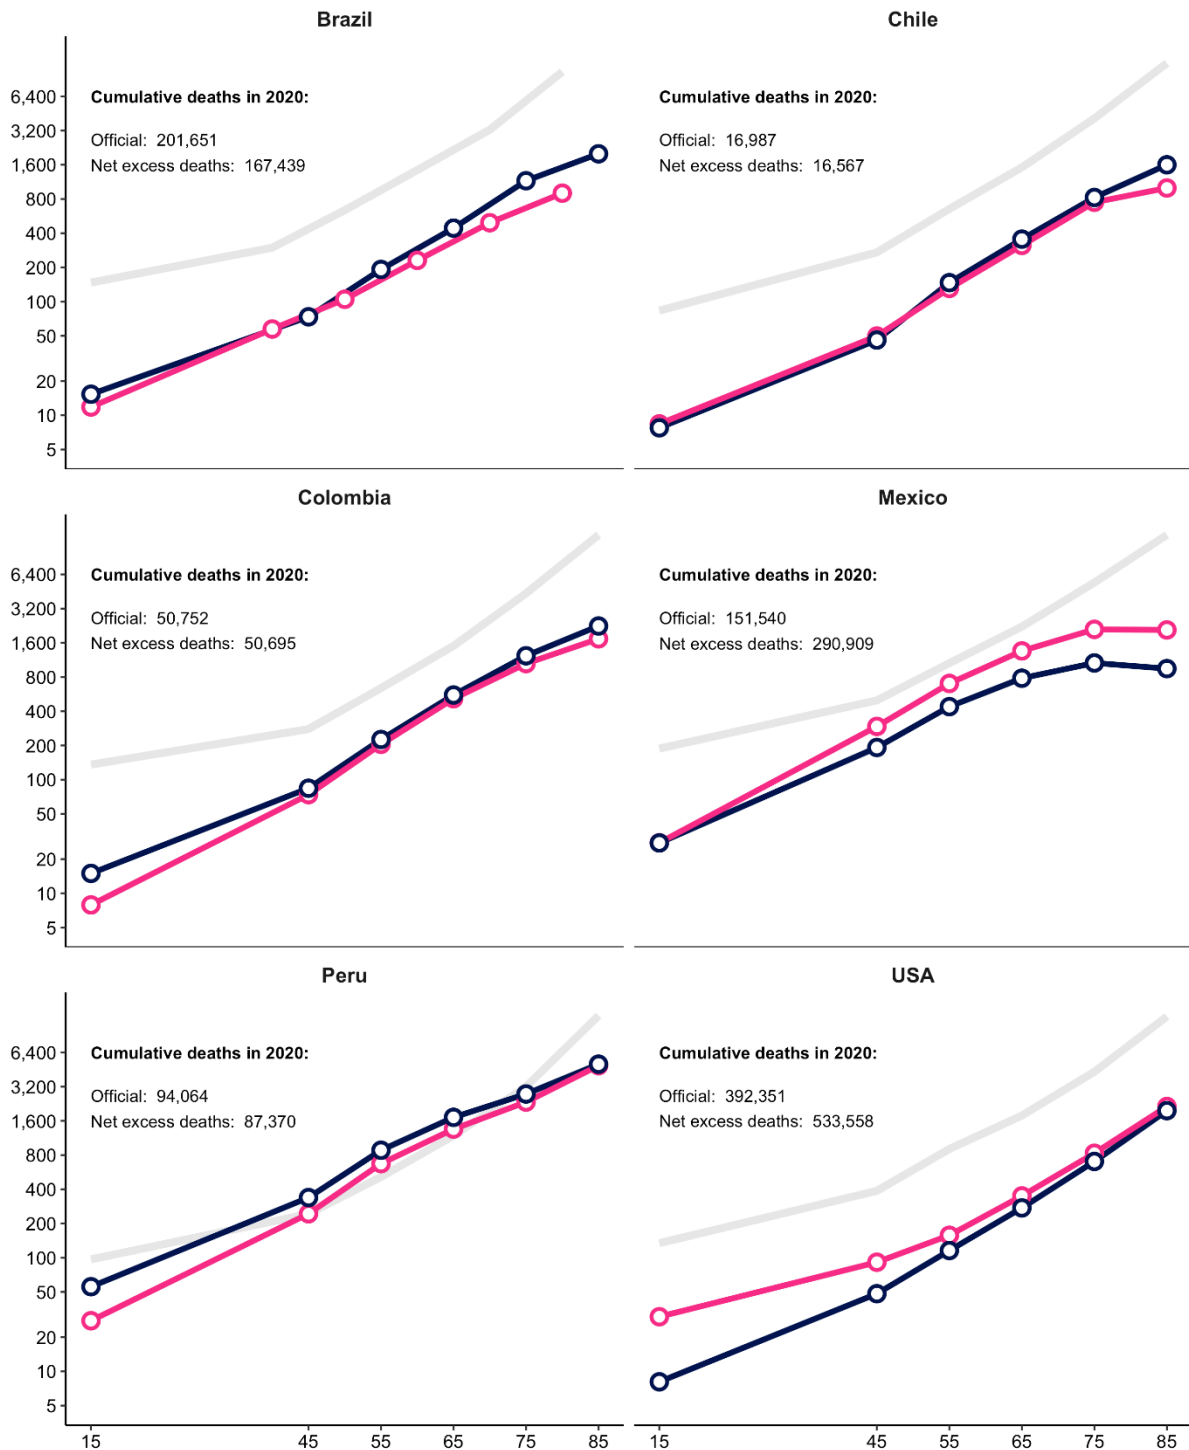

Note: Points are plotted at the start of each age group: 15-44,45-54,55-64,65-74,75-84, 85+.

Figure 5: Official COVID-19 vs excess deaths by age group, select Latin American countries and the United States (per 100,000 population)

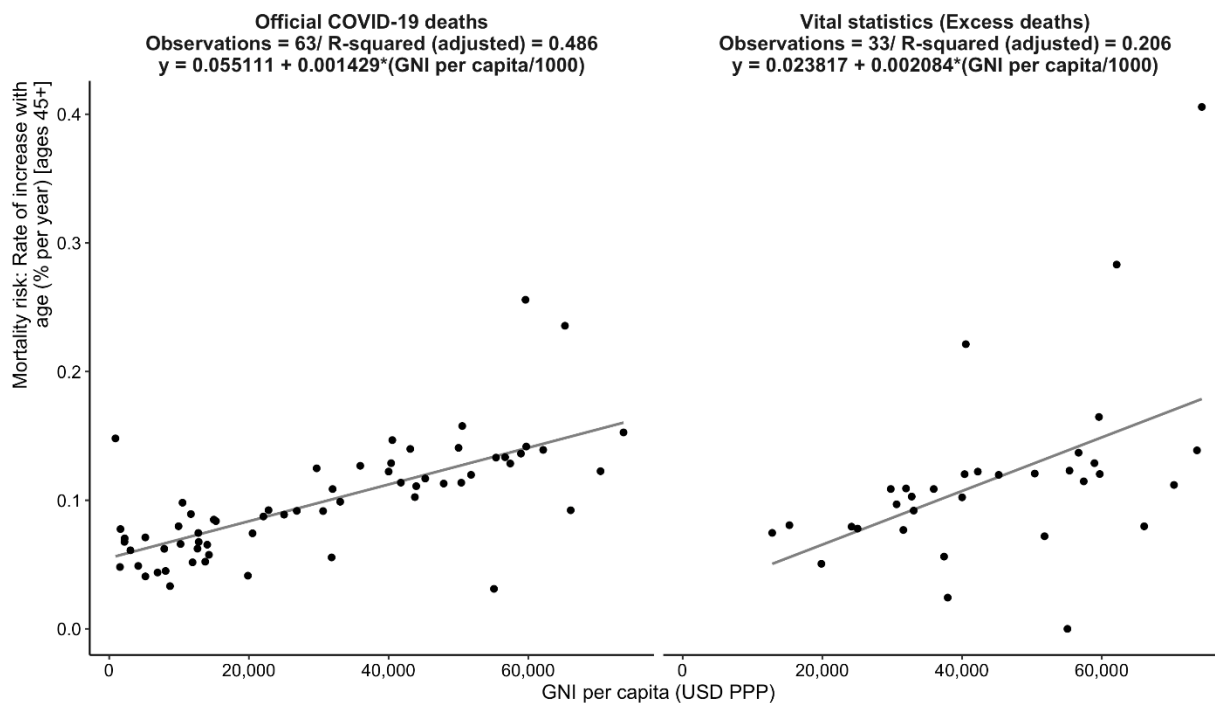

Figure 6: Slope of the age-mortality curve vs GNI per capita, official COVID-19 deaths vs excess deaths, all data

review only

1  
2  
3  
4  
5  
6  
7  
8  
9  
10  
11  
12  
13  
14  
15  
16  
17  
18  
19  
20  
21  
22  
23  
24  
25  
26  
27  
28  
29  
30  
31  
32  
33  
34  
35  
36  
37  
38  
39  
40  
41  
42  
43  
44  
45  
46  
47  
48  
49  
50  
51  
52  
53  
54  
55  
56  
57  
58  
59  
60

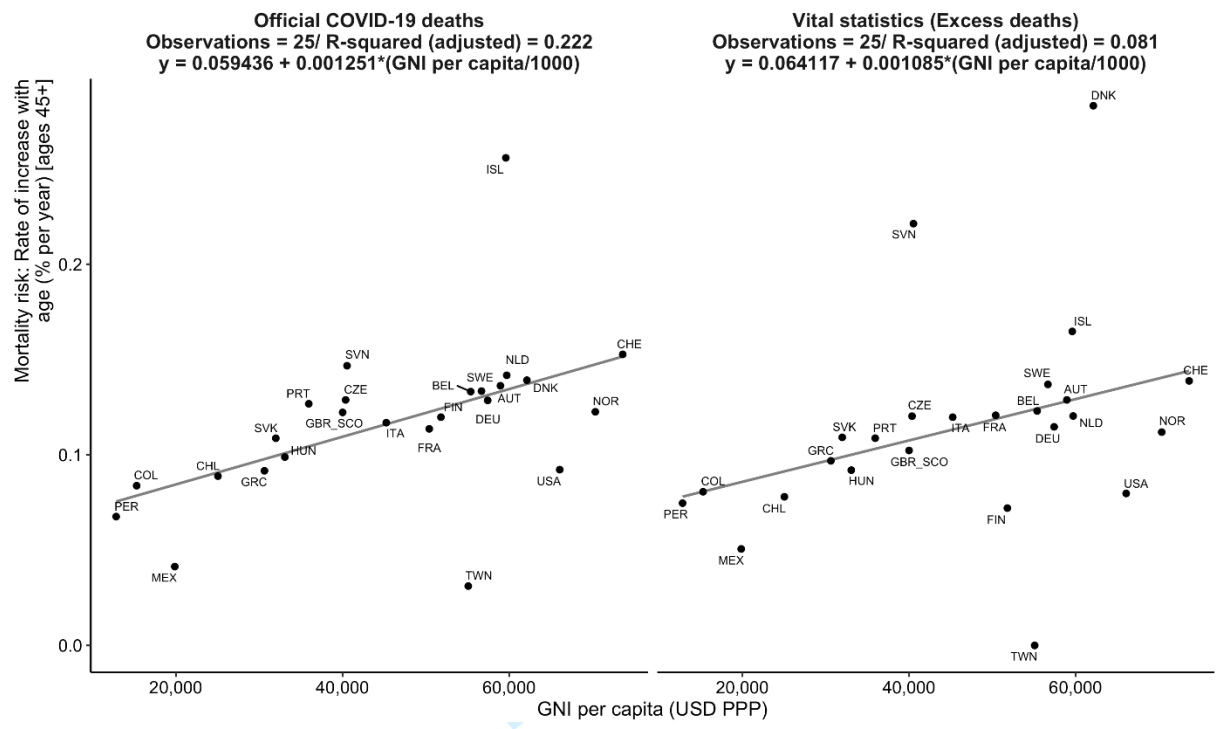

Figure 7: Slope of the age-mortality curve vs GNI per capita, official COVID-19 deaths vs excess deaths, common set of countries/economies

## *Online Appendix*

### **Data Availability**

#### *Data sources*

Official reported COVID-19 deaths aggregated in the COVERAGE database For this analysis the output file with death counts aggregated to 5-year age-groups is used.

There are 114 countries in the COVERAGE database (excluding England and United Kingdom). For this analysis, the political units that make up the United Kingdom are treated separately as follows: England and Wales, Scotland, and Northern Ireland.

84 countries have at least one record of cumulative deaths during 2020 or 2021.

64 countries have a record of cumulative deaths that covers at least 6 months since the first case was detected in the country (per case-data derived from Our World in Data). Countries with an “exposure” of less than 6 months as of the end of 2020 are excluded from the analysis.

The following is the set of 64 countries and economies with official reported deaths used in the analysis: Afghanistan; Albania; Algeria; Argentina; Australia; Austria; Bangladesh; Belgium; Brazil; Canada; Chad; Chile; Colombia; Costa Rica; Czechia; Denmark; El Salvador; England and Wales; Eswatini; Finland; France; Germany; Greece; Haiti; Hong Kong SAR, China; Hungary; Iceland; India; Indonesia; Israel; Italy; Jamaica; Japan; Jordan; Malawi; Mexico; Moldova; Nepal; Netherlands; New Zealand; Nigeria; Northern Ireland; Norway; Paraguay; Peru; Philippines; Portugal; Romania; Scotland; Slovak Republic; Slovenia; Somalia; South Africa; Republic of Korea; Spain; Sweden; Switzerland; Taiwan, China; Togo; Turkey; Ukraine; Uruguay; United States; Vietnam.

**Excess all-cause deaths from vital statistics records**, from the following sources:

Short term mortality fluctuations (STMF) harmonized data series from the Human Mortality Database

- For this analysis; the STMF input files are used. These input files cover 38 countries and economies: Australia; Austria; Belgium; Bulgaria; Canada; Switzerland; Chile; Czech Republic; Germany; Denmark; Spain; Estonia; Finland; France; Northern Ireland;

1  
2  
3 Scotland; England and Wales; Greece; Croatia; Hungary; Iceland; Israel; Italy; Republic  
4 of Korea; Lithuania; Luxembourg; Latvia; Netherlands; Norway; New Zealand; Poland;  
5 Portugal; Russian Federation; Slovak Republic; Slovenia; Sweden; Taiwan, China;  
6  
7 United States.  
8  
9

- 10 • Russia does not have data for 2020.
  - 11 • Chile and Germany do not have data for 2015.
- 12  
13

14 Colombia vital statistics tabulations (*Defunciones no fatales*) were compiled by DANE. 2019 and  
15 2020 tabulations are preliminary.  
16  
17

18 Historic (2015-2019) Mexico vital statistics microdata are those compiled (*Defunciones*  
19 *registradas, mortalidad general*) by INEGI, 2020-21 deaths microdata based on death  
20 certificates compiled by RENAPO and accessed via the government of Mexico's open data  
21 platform.  
22  
23  
24

25 Peru death certificate microdata were compiled by SINADEF obtained via correspondence with  
26 University of Toronto researchers.  
27  
28

29 Together there are 39 countries and economies with excess death estimates: Austria; Belgium;  
30 Bulgaria; Switzerland; Chile; Czech Republic; Germany; Denmark; Spain; Estonia; Finland;  
31 France; Scotland; Greece; Croatia; Hungary; Iceland; Italy; Lithuania; Luxembourg; Latvia;  
32 Netherlands; Norway; Poland; Portugal; Slovak Republic; Slovenia; Sweden; Taiwan, China;  
33  
34 Colombia; Peru; Mexico; England and Wales; United States; Australia; Canada; Israel; Republic  
35 of Korea; New Zealand.  
36  
37  
38

39 Of these, nine do not have corresponding official death records from the coverage database:  
40 Bulgaria, Czech Republic, Estonia, Croatia, Lithuania, Luxembourg, Latvia, Poland, Slovak  
41 Republic.  
42  
43  
44  
45

46 The preferred age group categories for the analyses conducted in this paper were as follows: 0-  
47 14, 15-44, 45-54, 55-64, 65-74, 75-84, 85+. However, since the reporting of all-cause deaths by  
48 age used by the Human Mortality Database is not consistent from country to country (not all  
49 countries report death counts tabulated at 5-year intervals or less), successively broader age-  
50 groupings are used in cases where the preferred age groups could not be constructed directly  
51 from the STMF input data. These countries include the United States, England and Wales,  
52  
53  
54  
55  
56  
57

1  
2  
3 Australia, Canada, New Zealand, Israel, the Republic of Korea, and Northern Ireland. We  
4 compute excess mortality rates for all unique country-age group combinations (as shown in  
5 Figure 4) but to estimate the age gradient of mortality, we only include countries for which we  
6 could construct the preferred age-group categories as described above. Countries for which we  
7 could not construct the preferred age-group categories are Brazil, Israel, and New Zealand. To  
8 avoid excluding the United States from this analysis, we use mortality data from the CDC which  
9 reports deaths for finer age groups for 2015 through 2019.  
10  
11  
12  
13  
14  
15  
16  
17  
18  
19  
20  
21  
22  
23  
24  
25  
26  
27  
28  
29  
30  
31  
32  
33  
34  
35  
36  
37  
38  
39  
40  
41  
42  
43  
44  
45  
46  
47  
48  
49  
50  
51  
52  
53  
54  
55  
56  
57  
58  
59  
60



**Annex Table A1: Age Distribution of Official COVID-19 Deaths and Excess Deaths in 2020 (Data Shown in Figure 2)**

| Country         | GNI PPP\$ | Group | Share (%) of official COVID-19 deaths by age group |       |       |       |       |     | Share (%) of excess mortality deaths by age group |       |       |       |       |     |
|-----------------|-----------|-------|----------------------------------------------------|-------|-------|-------|-------|-----|---------------------------------------------------|-------|-------|-------|-------|-----|
|                 |           |       | 0-44                                               | 45-54 | 55-64 | 65-74 | 75-84 | 85+ | 0-44                                              | 45-54 | 55-64 | 65-74 | 75-84 | 85+ |
| Bangladesh      | 5190      | LMIC  | 21                                                 | 24    | 26    | 13    | 9     | 6   |                                                   |       |       |       |       |     |
| India           | 6930      | LMIC  | 13                                                 | 19    | 27    | 26    | 12    | 3   |                                                   |       |       |       |       |     |
| Philippines     | 10220     | LMIC  | 13                                                 | 14    | 24    | 28    | 16    | 6   |                                                   |       |       |       |       |     |
| Jordan          | 10500     | UMIC  | 5                                                  | 10    | 20    | 28    | 28    | 9   |                                                   |       |       |       |       |     |
| Indonesia       | 11940     | LMIC  | 21                                                 | 22    | 28    | 16    | 9     | 4   |                                                   |       |       |       |       |     |
| South Africa    | 12640     | UMIC  | 13                                                 | 18    | 27    | 23    | 14    | 5   |                                                   |       |       |       |       |     |
| Paraguay        | 12760     | UMIC  | 8                                                  | 9     | 21    | 27    | 23    | 11  |                                                   |       |       |       |       |     |
| Peru            | 12820     | UMIC  | 8                                                  | 11    | 22    | 27    | 21    | 11  | 4                                                 | 11    | 21    | 27    | 23    | 14  |
| Ukraine         | 13750     | LMIC  | 4                                                  | 8     | 23    | 33    | 27    | 6   |                                                   |       |       |       |       |     |
| Moldova         | 14280     | LMIC  | 3                                                  | 8     | 26    | 38    | 20    | 5   |                                                   |       |       |       |       |     |
| Brazil*         | 14980     | UMIC  | 7                                                  | 8     | 17    | 24    | 28    | 16  | 3                                                 | 10    | 15    | 23    | 26    | 22  |
| Colombia        | 15280     | UMIC  | 6                                                  | 8     | 17    | 26    | 26    | 16  | 1                                                 | 9     | 19    | 29    | 27    | 15  |
| Mexico          | 19860     | UMIC  | 10                                                 | 16    | 26    | 27    | 17    | 5   | 4                                                 | 15    | 25    | 28    | 20    | 7   |
| Argentina       | 22080     | HIC   | 4                                                  | 6     | 14    | 25    | 28    | 23  |                                                   |       |       |       |       |     |
| Chile           | 25040     | HIC   | 4                                                  | 6     | 16    | 25    | 29    | 21  | 3                                                 | 7     | 17    | 26    | 31    | 16  |
| Turkey          | 26860     | UMIC  | 3                                                  | 7     | 17    | 30    | 28    | 15  |                                                   |       |       |       |       |     |
| Greece          | 30620     | HIC   | 2                                                  | 4     | 9     | 15    | 25    | 45  | 1                                                 | 3     | 7     | 17    | 42    | 30  |
| Slovakia        | 31980     | HIC   | 1                                                  | 3     | 11    | 28    | 36    | 21  | 1                                                 | 4     | 9     | 24    | 42    | 21  |
| Hungary         | 33070     | HIC   | 2                                                  | 4     | 11    | 25    | 34    | 25  | 2                                                 | 6     | 6     | 29    | 38    | 20  |
| Portugal        | 35940     | HIC   | 1                                                  | 1     | 5     | 14    | 30    | 49  | 2                                                 | 3     | 6     | 13    | 35    | 42  |
| Scotland        | 40000     | HIC   | 1                                                  | 2     | 7     | 19    | 32    | 40  | 0                                                 | 4     | 8     | 19    | 31    | 38  |
| Czechia         | 40360     | HIC   | 1                                                  | 1     | 6     | 22    | 38    | 31  | 0                                                 | 2     | 7     | 18    | 43    | 29  |
| Slovenia        | 40530     | HIC   | 1                                                  | 1     | 3     | 13    | 33    | 50  | 1                                                 | 4     | 0     | 14    | 34    | 47  |
| Israel          | 41750     | HIC   | 1                                                  | 3     | 8     | 21    | 28    | 39  |                                                   |       |       |       |       |     |
| Italy           | 45240     | HIC   | 1                                                  | 2     | 6     | 16    | 35    | 41  | 0                                                 | 2     | 5     | 16    | 33    | 44  |
| England & Wales | 47880     | HIC   | 1                                                  | 3     | 7     | 15    | 33    | 42  | 0                                                 | 0     | 0     | 0     | 0     | 0   |
| Canada          | 50010     | HIC   | 0                                                  | 1     | 4     | 12    | 25    | 57  | 0                                                 | 0     | 0     | 0     | 0     | 0   |
| France          | 50400     | HIC   | 1                                                  | 2     | 6     | 17    | 30    | 44  | 1                                                 | 2     | 5     | 12    | 32    | 48  |
| Belgium         | 55370     | HIC   | 0                                                  | 1     | 5     | 12    | 15    | 67  | 0                                                 | 2     | 6     | 12    | 34    | 46  |
| Sweden          | 56670     | HIC   | 1                                                  | 1     | 4     | 12    | 32    | 50  | 0                                                 | 1     | 5     | 7     | 40    | 47  |
| Germany         | 57410     | HIC   | 0                                                  | 1     | 5     | 12    | 34    | 47  | 2                                                 | 2     | 7     | 21    | 14    | 56  |
| Austria         | 58940     | HIC   | 0                                                  | 1     | 4     | 13    | 34    | 46  | 2                                                 | 1     | 8     | 16    | 39    | 34  |
| Netherlands     | 59700     | HIC   | 0                                                  | 1     | 4     | 14    | 36    | 44  | 1                                                 | 3     | 3     | 15    | 39    | 38  |
| USA             | 66060     | HIC   | 3                                                  | 5     | 12    | 21    | 28    | 32  | 7                                                 | 7     | 12    | 21    | 25    | 27  |
| Switzerland     | 73620     | HIC   | 0                                                  | 1     | 3     | 12    | 29    | 55  | 1                                                 | 1     | 3     | 8     | 28    | 58  |

\* The age groups available to compute excess deaths for Brazil differ from those used in other countries and correspond to the following: 0-39, 40-49, 50-59, 60-69, 70-79, 80+. GNI is from 2019.

**Annex Table A2: Hypothetical Age Distribution of Official COVID-19 and Excess Deaths in 2020, Using Country Age-Specific Mortality Rates and the US Population Age Distribution (Data Shown in Figure 3)**

| Country         | GNI PPP\$ | Group | Share (%) of official COVID-19 deaths by age group |       |       |       |       |     | Share (%) of excess mortality deaths by age group |       |       |       |       |     |
|-----------------|-----------|-------|----------------------------------------------------|-------|-------|-------|-------|-----|---------------------------------------------------|-------|-------|-------|-------|-----|
|                 |           |       | 0-44                                               | 45-54 | 55-64 | 65-74 | 75-84 | 85+ | 0-44                                              | 45-54 | 55-64 | 65-74 | 75-84 | 85+ |
| Bangladesh      | 5190      | LMIC  | 9                                                  | 15    | 26    | 22    | 14    | 15  |                                                   |       |       |       |       |     |
| India           | 6930      | LMIC  | 5                                                  | 11    | 24    | 30    | 18    | 11  |                                                   |       |       |       |       |     |
| Philippines     | 10220     | LMIC  | 4                                                  | 7     | 19    | 31    | 23    | 16  |                                                   |       |       |       |       |     |
| Jordan          | 10500     | UMIC  | 1                                                  | 3     | 13    | 28    | 31    | 24  |                                                   |       |       |       |       |     |
| Indonesia       | 11940     | LMIC  | 10                                                 | 12    | 24    | 21    | 16    | 18  |                                                   |       |       |       |       |     |
| South Africa    | 12640     | UMIC  | 4                                                  | 10    | 22    | 25    | 20    | 19  |                                                   |       |       |       |       |     |
| Paraguay        | 12760     | UMIC  | 3                                                  | 6     | 18    | 28    | 25    | 20  |                                                   |       |       |       |       |     |
| Peru            | 12820     | UMIC  | 4                                                  | 7     | 19    | 29    | 23    | 18  | 2                                                 | 6     | 18    | 28    | 24    | 21  |
| Ukraine         | 13750     | LMIC  | 4                                                  | 8     | 22    | 33    | 25    | 9   |                                                   |       |       |       |       |     |
| Moldova         | 14280     | LMIC  | 3                                                  | 6     | 20    | 36    | 25    | 9   |                                                   |       |       |       |       |     |
| Brazil*         | 14980     | UMIC  | 4                                                  | 5     | 14    | 24    | 31    | 22  | 2                                                 | 6     | 11    | 22    | 30    | 30  |
| Colombia        | 15280     | UMIC  | 3                                                  | 5     | 14    | 26    | 29    | 22  | 1                                                 | 5     | 15    | 29    | 30    | 20  |
| Mexico          | 19860     | UMIC  | 5                                                  | 10    | 24    | 32    | 22    | 8   | 2                                                 | 9     | 22    | 32    | 25    | 10  |
| Argentina       | 22080     | HIC   | 2                                                  | 5     | 14    | 26    | 27    | 26  |                                                   |       |       |       |       |     |
| Chile           | 25040     | HIC   | 2                                                  | 4     | 14    | 26    | 30    | 24  | 2                                                 | 5     | 15    | 27    | 33    | 18  |
| Turkey          | 26860     | UMIC  | 2                                                  | 4     | 14    | 29    | 29    | 23  |                                                   |       |       |       |       |     |
| Greece          | 30620     | HIC   | 3                                                  | 5     | 12    | 20    | 24    | 36  | 2                                                 | 4     | 10    | 22    | 38    | 23  |
| Slovakia        | 31980     | HIC   | 1                                                  | 2     | 10    | 25    | 34    | 28  | 1                                                 | 3     | 8     | 21    | 40    | 27  |
| Hungary         | 33070     | HIC   | 2                                                  | 3     | 13    | 24    | 30    | 29  | 2                                                 | 6     | 7     | 28    | 34    | 24  |
| Portugal        | 35940     | HIC   | 1                                                  | 2     | 7     | 17    | 28    | 46  | 3                                                 | 4     | 7     | 16    | 32    | 39  |
| Scotland        | 40000     | HIC   | 1                                                  | 2     | 7     | 20    | 29    | 41  | 0                                                 | 4     | 9     | 21    | 28    | 38  |
| Czechia         | 40360     | HIC   | 1                                                  | 1     | 7     | 20    | 34    | 36  | 0                                                 | 2     | 8     | 16    | 39    | 34  |
| Slovenia        | 40530     | HIC   | 1                                                  | 1     | 4     | 14    | 31    | 49  | 1                                                 | 5     | 0     | 15    | 33    | 46  |
| Israel          | 41750     | HIC   | 1                                                  | 2     | 10    | 20    | 30    | 37  |                                                   |       |       |       |       |     |
| Italy           | 45240     | HIC   | 1                                                  | 2     | 8     | 21    | 33    | 35  | 0                                                 | 2     | 8     | 22    | 31    | 38  |
| England & Wales | 47880     | HIC   | 1                                                  | 3     | 8     | 17    | 30    | 40  |                                                   |       |       |       |       |     |
| Canada          | 50010     | HIC   | 1                                                  | 1     | 4     | 12    | 25    | 56  |                                                   |       |       |       |       |     |
| France          | 50400     | HIC   | 1                                                  | 2     | 9     | 20    | 32    | 36  | 1                                                 | 2     | 8     | 15    | 35    | 40  |
| Belgium         | 55370     | HIC   | 1                                                  | 1     | 6     | 15    | 16    | 62  | 0                                                 | 2     | 7     | 14    | 35    | 41  |
| Sweden          | 56670     | HIC   | 1                                                  | 2     | 5     | 13    | 29    | 50  | 0                                                 | 1     | 7     | 8     | 37    | 47  |
| Germany         | 57410     | HIC   | 1                                                  | 2     | 6     | 17    | 30    | 45  | 2                                                 | 2     | 8     | 27    | 11    | 50  |
| Austria         | 58940     | HIC   | 0                                                  | 1     | 5     | 17    | 29    | 47  | 2                                                 | 1     | 9     | 21    | 34    | 34  |
| Netherlands     | 59700     | HIC   | 1                                                  | 1     | 4     | 15    | 34    | 46  | 2                                                 | 3     | 3     | 15    | 37    | 40  |
| USA             | 66060     | HIC   | 3                                                  | 5     | 12    | 21    | 28    | 32  | 7                                                 | 7     | 12    | 21    | 25    | 27  |
| Switzerland     | 73620     | HIC   | 0                                                  | 1     | 4     | 14    | 28    | 53  | 2                                                 | 2     | 3     | 10    | 27    | 56  |

\* The age groups available to compute excess deaths for Brazil differ from those used in other countries and correspond to the following: 0-39, 40-49, 50-59, 60-69, 70-79, 80+. GNI is from 2019.

**Annex Table A3: Rate of Increase in Risk of Death by Age and Ratio of Mortality Risk Between Age Groups**

| Country/economy      | Official deaths                                                    |                            | Excess deaths                                                      |                            |
|----------------------|--------------------------------------------------------------------|----------------------------|--------------------------------------------------------------------|----------------------------|
|                      | Exponential rate of increase in risk of death for each year of age | Ratio (MR 75-84/ MR 45-54) | Exponential rate of increase in risk of death for each year of age | Ratio (MR 75-84/ MR 45-54) |
| Afghanistan          | 0.07                                                               | 6                          | --                                                                 | --                         |
| Albania              | 0.07                                                               | 6                          | --                                                                 | --                         |
| Algeria              | 0.09                                                               | 11                         | --                                                                 | --                         |
| Argentina            | 0.09                                                               | 14                         | --                                                                 | --                         |
| Australia            | 0.16                                                               | 104                        | --                                                                 | --                         |
| Austria              | 0.14                                                               | 58                         | 0.13                                                               | 76                         |
| Bangladesh           | 0.04                                                               | 2                          | --                                                                 | --                         |
| Belgium              | 0.13                                                               | 29                         | 0.12                                                               | 43                         |
| Brazil               | 0.08                                                               | 16                         | --                                                                 | --                         |
| Bulgaria             | --                                                                 | --                         | 0.08                                                               | 12                         |
| Canada               | 0.14                                                               | 53                         | --                                                                 | --                         |
| Chad                 | 0.08                                                               | 6                          | --                                                                 | --                         |
| Chile                | 0.09                                                               | 18                         | 0.08                                                               | 15                         |
| Colombia             | 0.08                                                               | 15                         | 0.08                                                               | 14                         |
| Costa Rica           | 0.07                                                               | 8                          | --                                                                 | --                         |
| Croatia              | --                                                                 | --                         | 0.11                                                               | 24                         |
| Czechia              | 0.13                                                               | 62                         | 0.12                                                               | 49                         |
| Denmark              | 0.14                                                               | 75                         | 0.28                                                               | -                          |
| El Salvador          | 0.03                                                               | 2                          | --                                                                 | --                         |
| England and Wales    | 0.11                                                               | 28                         | --                                                                 | --                         |
| Estonia              | --                                                                 | --                         | 0.02                                                               | 1                          |
| Eswatini             | 0.05                                                               | 4                          | --                                                                 | --                         |
| Finland              | 0.12                                                               | 27                         | 0.07                                                               | 9                          |
| France               | 0.11                                                               | 34                         | 0.12                                                               | 43                         |
| Germany              | 0.13                                                               | 45                         | 0.11                                                               | 14                         |
| Greece               | 0.09                                                               | 11                         | 0.10                                                               | 26                         |
| Haiti                | 0.06                                                               | 5                          | --                                                                 | --                         |
| Hong Kong SAR, China | 0.24                                                               | -                          | --                                                                 | --                         |
| Hungary              | 0.10                                                               | 22                         | 0.09                                                               | 15                         |
| Iceland              | 0.26                                                               | -                          | 0.16                                                               | 16                         |
| India                | 0.04                                                               | 4                          | --                                                                 | --                         |
| Indonesia            | 0.05                                                               | 3                          | --                                                                 | --                         |
| Israel               | 0.11                                                               | 33                         | --                                                                 | --                         |
| Italy                | 0.12                                                               | 40                         | 0.12                                                               | 39                         |
| Jamaica              | 0.08                                                               | 9                          | --                                                                 | --                         |
| Japan                | 0.10                                                               | 30                         | --                                                                 | --                         |

1  
2  
3  
4  
5  
6  
7  
8  
9  
10  
11  
12  
13  
14  
15  
16  
17  
18  
19  
20  
21  
22  
23  
24  
25  
26  
27  
28  
29  
30  
31  
32  
33  
34  
35  
36  
37  
38  
39  
40  
41  
42  
43  
44  
45  
46  
47  
48  
49  
50  
51  
52  
53  
54  
55  
56  
57  
58  
59  
60

|                  |      |    |    |      |    |    |
|------------------|------|----|----|------|----|----|
| Jordan           | 0.10 |    | 24 |      | -- |    |
| Latvia           |      | -- |    | 0.08 |    | 6  |
| Lithuania        |      | -- |    | 0.06 |    | 5  |
| Luxembourg       |      | -- |    | 0.41 |    | -  |
| Malawi           | 0.05 |    | 3  |      | -- |    |
| Mexico           | 0.04 |    | 6  | 0.05 |    | 7  |
| Moldova          | 0.06 |    | 10 |      | -- |    |
| Nepal            | 0.05 |    | 3  |      | -- |    |
| Netherlands      | 0.14 |    | 74 | 0.12 |    | 28 |
| New Zealand      | 0.11 |    | 28 |      | -- |    |
| Nigeria          | 0.07 |    | 6  |      | -- |    |
| Northern Ireland | 0.12 |    | 36 |      | -- |    |
| Norway           | 0.12 |    | 32 | 0.11 |    | 17 |
| Paraguay         | 0.07 |    | 11 |      | -- |    |
| Peru             | 0.07 |    | 8  | 0.07 |    | 10 |
| Philippines      | 0.07 |    | 8  |      | -- |    |
| Poland           |      | -- |    | 0.10 |    | 16 |
| Portugal         | 0.13 |    | 39 | 0.11 |    | 21 |
| Romania          | 0.06 |    | 6  |      | -- |    |
| Scotland         | 0.12 |    | 38 | 0.10 |    | 17 |
| Slovak Republic  | 0.11 |    | 34 | 0.11 |    | 34 |
| Slovenia         | 0.15 |    | 81 | 0.22 |    | 18 |
| Somalia          | 0.15 |    | 57 |      | -- |    |
| South Africa     | 0.06 |    | 5  |      | -- |    |
| Korea, Rep.      | 0.14 |    | 80 |      | -- |    |
| Spain            | 0.12 |    | 37 | 0.12 |    | 45 |
| Sweden           | 0.13 |    | 47 | 0.14 |    | 78 |
| Switzerland      | 0.15 |    | 97 | 0.14 |    | 43 |
| Taiwan, China    | 0.03 |    | 1  | 0.00 |    | 15 |
| Togo             | 0.07 |    | 3  |      | -- |    |
| Turkey           | 0.09 |    | 18 |      | -- |    |
| Ukraine          | 0.05 |    | 8  |      | -- |    |
| Uruguay          | 0.09 |    | 20 |      | -- |    |
| United States    | 0.09 |    | 15 | 0.08 |    | 9  |
| Vietnam          | 0.06 |    | 9  |      | -- |    |

# BMJ Open

**Are COVID-19 age-mortality curves for 2020 flatter in developing countries?  
Evidence from an observational study of official death counts and excess deaths estimates.**

|                                 |                                                                                                                                                                                                                                                                                                                                                        |
|---------------------------------|--------------------------------------------------------------------------------------------------------------------------------------------------------------------------------------------------------------------------------------------------------------------------------------------------------------------------------------------------------|
| Journal:                        | <i>BMJ Open</i>                                                                                                                                                                                                                                                                                                                                        |
| Manuscript ID                   | bmjopen-2022-061589.R1                                                                                                                                                                                                                                                                                                                                 |
| Article Type:                   | Original research                                                                                                                                                                                                                                                                                                                                      |
| Date Submitted by the Author:   | 09-Jun-2022                                                                                                                                                                                                                                                                                                                                            |
| Complete List of Authors:       | Demombynes, Gabriel; World Bank, Human Development Global Practice de Walque, Damien; World Bank, Development Research Group Gubbins, Paul; World Bank, Human Development Global Practice Urdinola, Piedad ; Universidad Nacional de Colombia - Sede Bogotá, School of Economics Veillard, Jeremy; World Bank Group, Human Development Global Practice |
| <b>Primary Subject Heading</b>: | Infectious diseases                                                                                                                                                                                                                                                                                                                                    |
| Secondary Subject Heading:      | Epidemiology                                                                                                                                                                                                                                                                                                                                           |
| Keywords:                       | COVID-19, EPIDEMIOLOGY, PUBLIC HEALTH                                                                                                                                                                                                                                                                                                                  |
|                                 |                                                                                                                                                                                                                                                                                                                                                        |

SCHOLARONE™  
Manuscripts



I, the Submitting Author has the right to grant and does grant on behalf of all authors of the Work (as defined in the below author licence), an exclusive licence and/or a non-exclusive licence for contributions from authors who are: i) UK Crown employees; ii) where BMJ has agreed a CC-BY licence shall apply, and/or iii) in accordance with the terms applicable for US Federal Government officers or employees acting as part of their official duties; on a worldwide, perpetual, irrevocable, royalty-free basis to BMJ Publishing Group Ltd ("BMJ") its licensees and where the relevant Journal is co-owned by BMJ to the co-owners of the Journal, to publish the Work in this journal and any other BMJ products and to exploit all rights, as set out in our [licence](#).

The Submitting Author accepts and understands that any supply made under these terms is made by BMJ to the Submitting Author unless you are acting as an employee on behalf of your employer or a postgraduate student of an affiliated institution which is paying any applicable article publishing charge ("APC") for Open Access articles. Where the Submitting Author wishes to make the Work available on an Open Access basis (and intends to pay the relevant APC), the terms of reuse of such Open Access shall be governed by a Creative Commons licence – details of these licences and which [Creative Commons](#) licence will apply to this Work are set out in our licence referred to above.

Other than as permitted in any relevant BMJ Author's Self Archiving Policies, I confirm this Work has not been accepted for publication elsewhere, is not being considered for publication elsewhere and does not duplicate material already published. I confirm all authors consent to publication of this Work and authorise the granting of this licence.

1  
2  
3  
4  
5 **Are COVID-19 age-mortality curves for 2020 flatter in developing countries?**  
6 **Evidence from an observational study of official death counts and excess deaths estimates.**  
7

8  
9 Gabriel Demombynes<sup>1</sup>, Damien de Walque<sup>2</sup>, Paul Gubbins<sup>1</sup>,  
10  
11 B. Piedad Urdinola<sup>3</sup>, Jeremy Veillard<sup>1</sup>  
12  
13  
14  
15  
16  
17  
18  
19  
20  
21  
22  
23  
24  
25  
26  
27  
28  
29  
30

31  
32 Keywords: COVID-19, Pandemic, Developing Countries, Mortality  
33  
34  
35  
36

37 Corresponding author: Damien de Walque, The World Bank, Development Research Group, The  
38 World Bank. [ddewalque@worldbank.org](mailto:ddewalque@worldbank.org)  
39  
40  
41

42 Affiliations  
43

- 44 1. The World Bank, Human Development Global Practice
- 45 2. The World Bank, Development Research Group
- 46 3. School of Economics at Universidad Nacional de Colombia-Bogotá  
47  
48  
49  
50  
51  
52  
53  
54  
55  
56  
57  
58  
59  
60

## Abstract

### *Objectives*

Previous studies have found a pattern of flatter COVID-19 age-mortality curves among low- and middle-income countries using only official COVID-19 death counts. This study examines this question by comparing the age gradient of COVID-19 mortality in a broad set of countries using both official COVID-19 death counts and excess mortality estimates for 2020.

### *Design*

This observational study uses official COVID-19 death counts for 76 countries and excess death estimates for 42 countries. A standardized population analysis was conducted to assess the extent to which variation across countries in the age distribution of COVID-19 deaths was driven by variation in the population age distribution.

### *Setting and primary outcomes*

Official reported COVID-19 deaths and excess deaths for 2020 for all countries where such data was available in the COVERAGE database and the Short-Term Mortality Fluctuations (STMF) harmonized data series, respectively.

### *Results*

A higher share of pandemic-related deaths in 2020 occurred at younger ages in middle-income countries compared to high-income countries. People under age 65 constituted on average (1) 10 percent of official deaths and 11 percent of excess deaths in high-income countries, (2) 34 percent of official deaths and 33 percent of excess deaths in upper-middle-income countries, and (3) 54 percent of official deaths in lower-middle-income countries. These contrasting profiles are due only in part to differences in population age structure.

### *Conclusions*

These findings are driven by some combination of variation in age patterns of infection rates and infection fatality rates. They indicate that COVID-19 is not just a danger to older people in developing countries, where a large share of victims are people of working age, who are caregivers and breadwinners for their families.



### Strengths and limitations of this study

- Nearly all studies of the pandemic's age mortality patterns have used only official COVID-19 death data. However, excess deaths at the aggregate population level during the pandemic exceed officially recognized COVID-19 deaths in most countries.
- This study compares the age gradient of COVID-19 mortality in a broad set of countries using both official COVID-19 death counts and excess mortality estimates for 2020.
- Using a standardized population analysis, this study assesses the extent to which variation across countries in the age distribution of COVID-19 deaths was driven by variation in the population age distribution.
- The available data does not allow ascertaining to what extent the reported differences in the age-specific mortality rates are driven by differences in age-specific cumulative infection rates or in the age-specific cumulative infection fatality rate or both.
- Because of limitations in available mortality data, the analysis includes a large set of high-and-middle income countries but does not include many low-income countries.

## Introduction

An important question for understanding the global impact of the COVID-19 pandemic is the disease's age pattern of mortality across countries. Early in the pandemic, case data from COVID-19 patients in mainland China showed that COVID-19 mortality risk increases rapidly with age.<sup>[1]</sup> This risk profile would tend to limit the death toll in developing countries, which generally have younger populations. But this prediction only holds if the age profile of COVID-19 mortality remains similar across countries.

Our study examines this question by comparing the age gradient of COVID-19 mortality in a broad set of countries using both official COVID-19 death counts and excess mortality estimates for 2020. Vaccine availability was very limited before 2021 and therefore is unlikely to affect the mortality patterns identified in this analysis.

Nearly all studies of the pandemic's age mortality patterns have used only official COVID-19 death data.<sup>[2-7]</sup> Some of these studies have found a pattern of flatter COVID-19 age-mortality curves among low- and middle-income countries (LMICs) using only official COVID-19 death counts.<sup>[4],[7]</sup> However, excess deaths at the aggregate population level during the pandemic exceed officially recognized COVID-19 deaths in most countries.<sup>[8-10]</sup> Other studies have used excess mortality estimates but have mainly focused on estimating changes to life-expectancy without examining the age profile of the COVID-19 impacts on mortality.<sup>[11-13]</sup> This is to our knowledge the first study that estimates COVID-19 excess mortality by age for a wide swath of countries.

Several studies have highlighted possible contributing factors to variation across countries in overall COVID-19 mortality, including age structure of the population and preexisting health conditions and those same factors could generate different patterns in mortality by age.<sup>[14-19]</sup> When using only official death counts, it is unclear to what extent the finding of flatter COVID-19 age-mortality curves among low- and middle-income countries (LMICs) may have been driven by data reporting issues. In particular, it is possible that deaths among older people in developing countries have been more likely to be under-attributed to the disease in official COVID-19 death counts. This paper addresses that concern and examines this question by

1  
2  
3 comparing the age gradient of COVID-19 mortality in a broad set of countries using both official  
4 COVID-19 death counts and excess mortality estimates for 2020.  
5  
6  
7  
8  
9  
10

## 11 **Methods**

### 12 *Data sources*

13 The analysis employs two main sources of data:  
14  
15

- 16 1. Official reported COVID-19 deaths drawn from the COVERAGE database, with death  
17 counts aggregated to 5-year age-groups, downloaded May 16, 2022.<sup>[20]</sup> 76 countries have  
18 a record of cumulative deaths that satisfies the inclusion criteria of covering at least 6  
19 months since the first case was detected in the country (per case-data derived from [Our](#)  
20 [World in Data](#)<sup>[21]</sup>).  
21  
22
- 23 2. All-cause deaths by age drawn from national vital statistics records, aggregated in the  
24 Short-Term Mortality Fluctuations harmonized data series assembled as part of the  
25 Human Mortality Database, downloaded February 18, 2022 (38 countries).<sup>[22], [23]</sup>  
26  
27  
28  
29  
30  
31

32 Additional all-cause death data from Colombia, Mexico, Brazil, Peru and the United States was  
33 obtained from national statistical offices.<sup>[24-27]</sup> Contrary to other COVID mortality estimates  
34 such as those released by the World Health Organization, this study does not use modelled data.  
35  
36  
37  
38  
39  
40  
41  
42  
43  
44  
45  
46  
47  
48  
49  
50  
51  
52  
53  
54  
55  
56  
57  
58  
59  
60

### *Standardized population*

A standardized population analysis was conducted to assess the extent to which variation across  
countries in the age distribution of COVID-19 deaths was driven by variation in the population  
age distribution. First age-specific mortality rates were calculated by dividing the number of  
deaths attributed to COVID-19 for each age group by the population in each age group. These  
calculations were conducted for the following age groups: under 45, 45-54, 55-64, 65-74, 75-84,  
85 and above. A hypothetical age distribution of deaths for each country was calculated by  
multiplying the age-specific COVID-19 mortality rates by corresponding population shares from

1  
2  
3 the United States. A parallel calculation was carried out using estimates of excess mortality by  
4 age.  
5

### 6 *Excess mortality calculations*

7  
8  
9 Excess mortality methods compare the number of deaths to the number of expected deaths  
10 during a period of interest. Excess mortality is often treated as the “gold standard” in analysis of  
11 COVID-19 mortality.<sup>[29]</sup> However, there are two issues that are often overlooked in the analysis  
12 of excess mortality.  
13  
14

15  
16  
17 The first issue is that estimates are sensitive to the choice of method. Many COVID-19 excess  
18 mortality calculations have estimated expected deaths as the mean number of deaths over a  
19 corresponding period in previous years. If the number of deaths was trending upward in previous  
20 years, this common approach will over-estimate excess mortality.<sup>[30], [31]</sup>  
21  
22

23  
24 This issue is illustrated in Figure 1 for five Latin American countries. All five countries show an  
25 increase in the number of annual deaths over 2015-19. Excess death estimates based on  
26 predicting expected 2020 deaths using estimated 2015-19 linear trends (red lines) are shown as  
27 “Excess 1.” Alternative excess death estimates using a prediction based on the 2015-19 mean  
28 death count (blue lines) are shown as “Excess 2.” In all cases, ignoring the increase over time  
29 and using the historical mean to calculate expected deaths would result in substantial  
30 overestimation of excess deaths.  
31  
32

33  
34  
35 For the analysis in this paper, expected deaths are estimated using a simple regression using  
36 2015-2019 historical data, run separately by country and age-group, where observed deaths are  
37 modeled as a linear function of year and an error term.  
38  
39

40  
41  
42 The second issue often neglected in COVID-19 excess mortality discussions is that excess  
43 mortality represents a combination of effects. Specifically,  
44

45  
46  
47 *Net excess deaths* =

$$48 \quad [Direct\ COVID-19\ deaths] + [Indirect\ COVID-19\ deaths] - [Averted\ deaths]$$

49  
50  
51 *Direct COVID-19 deaths* are those due to infection with the virus. *Indirect COVID-19 deaths* are  
52 those due in part to factors such as congestion in the health system, delays in care-seeking, or  
53 mental health issues caused by the pandemic. *Averted deaths* are those that would have taken  
54  
55  
56  
57

place in the absence of the pandemic but did not occur as a result of pandemic-induced measures. These could include deaths due to other infectious diseases, violence, or traffic injuries that were avoided due to voluntary or mandated social distancing. The possibility of non-zero indirect deaths and averted deaths makes the interpretation of excess deaths more complex than is often recognized.

### *Slope calculation*

The shape of an age-mortality curve can be summarized in terms of the percent rate of increase in the mortality rate per year of additional age after age 45, calculated by running a Poisson regression using deaths as response variable and exposures as an offset, fitting a Gompertz (1825) model to the data. [32, 33]

$$D_{x, i} \sim \text{Poisson}(u_i \theta_i) \text{ where } \theta_i = \exp(\alpha_i + \beta_i X_i)$$

where the age-specific number of deaths is  $D_{x, i}$  for the ten-year age group age  $x$  to age  $x + 9$ , ( $x = 45, 55, 65, 75, 85$ ) in country  $i$ . The  $x = 85$  points correspond to the group consisting of all ages 85 and above. To interpret death counts relative to person-years, an exposure term  $u_i$  is introduced as an offset in the model as  $\log(u_i)$ .

The coefficients,  $\beta_i$ , are the rates of increase per year of age in the mortality rate. This calculation was performed first defining  $D(x, i)$  in terms of official COVID-19 counts by age for each country for which data was available. The calculation was also performed for each country defining  $D(x, i)$  using excess mortality estimates by age as described in the previous section.<sup>1</sup> These results provide 1) the slope of the COVID-19 age-mortality curve according to official counts, and 2) the slope of the age-mortality curve for excess deaths.

### **Patient and public involvement**

The study presents analysis of secondary data. There was no patient and public involvement.

### **Results**

The left side of Figure 2 shows the age distribution of officially recorded COVID-19 deaths in 2020 by country and the age distribution of excess deaths. According to official reports, on

---

<sup>1</sup> When estimated excess deaths were zero or less, a weight of zero was assigned to such cases.

1  
2  
3 average across high-income countries, just 10 percent of deaths were among those under age 65.<sup>2</sup>  
4  
5 In contrast, people under 65 constituted on average 34 percent of official COVID-19 deaths in  
6  
7 upper-middle-income countries and 54 percent of deaths in lower-middle-income countries. The  
8  
9 same pattern is observed using the distribution of excess deaths by age, shown on the right side  
10  
11 of Figure 2. In high-income countries, those under 65 are 11 percent of excess deaths. For the  
12  
13 upper-middle-income countries for which data is available (Peru, Colombia, and Mexico), the  
14  
15 age profiles of excess deaths are similar to those of official COVID-19 deaths, and those under  
16  
17 age 65 account for on average 33 percent of excess deaths.<sup>3</sup>

18  
19 Figure 3 shows the hypothetical age distribution of COVID-19 deaths according to official  
20  
21 reports, as well as excess deaths, applying the United States standardized age distribution. This  
22  
23 controls for the differing population age distributions across countries. Unsurprisingly in low-  
24  
25 and middle-income countries, which have younger populations than the United States, the  
26  
27 hypothetical distribution shows an older profile of deaths as compared to the actual distribution.  
28  
29 However, the pattern of a younger profile of deaths in less wealthy countries remains, both with  
30  
31 official data and with excess mortality data. The numbers shown in Figures 2 and 3 can also be  
32  
33 found in Appendix Tables A1 and A2.

34  
35 Notably the United States has a much younger profile of death—using both official COVID-19  
36  
37 death counts and excess mortality—than countries with similar income levels. This is the case  
38  
39 even after controlling for differences in population age distribution. The age distribution of  
40  
41 deaths in the United States is roughly similar to that of Chile. In both countries, 27 percent of  
42  
43 excess deaths were among those under age 65.

44  
45 Figure 4 presents a visual representation of all the mortality rates by age group across all  
46  
47 countries and economies with available data. The vertical axis represents mortality rates per  
48  
49 100,000 on a log scale, and it is important to note that the scale varies across countries, reflecting  
50  
51 the different levels of exposure to the pandemic and to its related mortality across the globe.

---

52  
53 <sup>2</sup> Note that all countries in Figure 2 from Chile downward with the exception of Turkey on the figure are classified  
54  
55 as high-income countries. Turkey is classified as an upper-middle-income country. Bangladesh, India, the  
56  
57 Philippines, Jordan, and Indonesia are lower-middle-income countries. World Bank classifications are based on GNI  
58  
59 calculated by the Atlas method while the figure uses GNI calculated with purchasing power parity exchange rates.

60  
<sup>3</sup> Data is also available to produce excess death estimates by age for Brazil, but not with our preferred age group  
breakdown.

1  
2  
3 Overall, mortality rates increase with age, albeit with different gradients. With the excess  
4 mortality data, a few deviations from this gradient are likely due to the relatively low mortality  
5 as well as the overall small number of deaths (e.g., Iceland). Australia, New Zealand and  
6 Taiwan, China have close to zero official COVID-19 deaths and show negative estimates of  
7 excess mortality rates, especially for the older age groups, likely reflecting averted deaths due to  
8 isolation policies.  
9

10  
11  
12  
13  
14 Figure 5 shows a more detailed comparison of results for five Latin American countries and the  
15 United States, using the same log scale for all countries. To add perspective on the extent of  
16 COVID-19 related mortality compared to what might have been the mortality experience in the  
17 absence of the COVID-19 pandemic, each figure adds in grey the expected all-cause mortality  
18 for 2020, based on levels and trends in the 5 preceding years. For each country, the figure also  
19 reports the total cumulative deaths for 2020 using both official COVID-19 deaths and excess  
20 mortality.  
21  
22  
23  
24  
25

26  
27 Official COVID-19 death counts are higher than excess-mortality estimates in some cases. These  
28 patterns indicate that for these country-age group combinations, the number of deaths averted  
29 due to the pandemic exceeds indirect COVID-19 deaths. This could have occurred, for example,  
30 because a decline in driving and exposure to violence during lockdowns and a reduction in  
31 transmission of other infectious diseases as a result of pandemic precautions. Similar to our  
32 estimates, dos Santo et al (2021) <sup>[34]</sup> find for Brazil that total estimated excess mortality in 2020  
33 was below the official COVID-19 death count, reflecting drops in deaths due to violence as well  
34 as cardiovascular and infectious diseases.  
35  
36  
37  
38  
39  
40

41  
42 In Mexico, the mortality estimates using excess deaths is consistently higher than using the  
43 official COVID-19 death count, and the gap between both measures increases with age. In the  
44 United States, mortality estimates using excess deaths are also higher than using official COVID-  
45 19 deaths, but that difference decreases with age and becomes minimal for older age groups. The  
46 especially extreme impact of the pandemic in Peru is evident in Figure 5. Among those ages 45-  
47 74, both deaths attributed to COVID-19 and excess deaths exceeded total expected all-cause  
48 mortality for 2020.  
49  
50  
51  
52  
53

54  
55 Another notable pattern evident in Figure 5 is the large gap between the two measures for the  
56 United States at younger age groups. For the 15-44 age group, the excess death estimate is four  
57



1  
2  
3 times the official COVID-19 death count. Given that testing of patients with COVID-19  
4 symptoms has been widespread in the United States in all but the early stages of the pandemic,  
5 the jump in excess mortality among young people most likely reflects indirect COVID-19 deaths.  
6  
7

8  
9 Figure 6 explores how the slope of the age-mortality gradient for each country varies with its  
10 level of income. More precisely, it shows the exponential rate of increase in mortality by age in  
11 percent per year against 2019 GNI per capita (the numbers for the estimated rates of increase are  
12 available in Appendix Table A3). The right panel presents this plot for the 76 countries with  
13 official COVID-19 deaths data and the right displays the corresponding plot for the 34 countries  
14 with excess deaths estimates available for a consistent set of age-groups as follows: 45-54, 55-  
15 64, 65-74, 75-84, 85+. Using all available data, we find that the increase in mortality risk with  
16 each additional year of age typically ranges (IQR) from 6.3 to 11.7 percent (median = 9.8) using  
17 excess deaths and 5.9 to 11.1 percent (median = 7.6) using official deaths.  
18  
19  
20  
21  
22  
23  
24

25 Both plots show a positive association between income per capita and the age-mortality gradient,  
26 indicating that COVID-19 mortality increases more steeply for older age groups in richer  
27 countries. Using official death rate data, across countries the rate of increase of mortality risk per  
28 year of age rises by 0.11 percent for each US\$1,000 of GNI. Using excess mortality data, it rises  
29 by 0.03 percent for each US\$1,000 of GNI.  
30  
31  
32  
33

34 To verify that this observed association is not driven by the composition of both sets of  
35 countries/economies, Figure 7 repeats the same exercise with the common set of 28  
36 countries/economies. The conclusions taken from Figures 6 and 7 are similar: COVID mortality  
37 is more concentrated among older individuals in richer countries. Using official death rate data,  
38 across countries the rate of increase of mortality risk per year of age rises by 0.13 percent for  
39 each US\$1,000 of GNI. Using excess mortality data, it rises by 0.05 percent for each US\$1,000  
40 of GNI.  
41  
42  
43  
44  
45  
46  
47

## 48 Discussion

49  
50 The age profile of COVID-19 mortality risk in 2020 was flatter (with relatively higher mortality  
51 at younger ages) in countries with lower incomes. This pattern is found using official COVID-19  
52 death data from a large set of countries as well as excess mortality from a smaller set of countries  
53 which include high-income countries plus Colombia, Mexico, and Peru. Our analysis concerns  
54  
55  
56  
57



1  
2  
3 the year 2020 and is therefore unaffected by the arrival of COVID-19 vaccines and their unequal  
4 distribution across countries.  
5

6  
7 One limitation of this study is that the available data does not allow ascertaining to what extent  
8 the reported differences in the age-specific mortality rates are driven by differences in age-  
9 specific cumulative infection rates or in the age-specific cumulative infection fatality rate or  
10 both. Further, because of limitations in available mortality data, the analysis includes a large set  
11 of high-and-middle income countries but does not include many low-income countries. Finally,  
12 we acknowledge that, even as we used excess mortality measures to address the concern of  
13 under-reporting of official COVID-19 deaths, all causes mortality itself could also be  
14 underreported in some countries and that the extent of underreporting might vary across  
15 countries. This would however affect our analysis only to the extent that the underreporting of all  
16 causes mortality was affected by the COVID pandemic.  
17  
18  
19  
20  
21  
22  
23  
24

25 The findings in this paper can provide the basis for a more comprehensive accounting of the  
26 impact of COVID-19. For example, the younger mortality profile in developing countries means  
27 that in those countries the pandemic has killed large numbers of people who were of working  
28 age, many of whom were their families' breadwinners. Earlier global estimates suggest that more  
29 than 1.5 million children have experienced the death of at least one caregiver as a consequence  
30 of the pandemic.<sup>[35]</sup> This raises the concern that long-term impacts via lower investments in  
31 human capital of orphaned children will be particularly deep in developing countries. This is  
32 highly worrisome given the already massive declines in school enrollment and learning losses  
33 generated by the pandemic in developing countries.<sup>[36–38]</sup>  
34  
35  
36  
37  
38  
39  
40

41 A full understanding of age-specific patterns of excess mortality will require country-by-country  
42 analysis using cause-of-death data, where available, to pull apart estimates of direct COVID-19  
43 deaths, indirect COVID-19 deaths, and averted deaths. A brief comparison of Colombia and the  
44 United States highlights how components of excess mortality can vary widely by country. In  
45 Colombia, both vehicular and homicide deaths fell during the country's lockdown, reducing its  
46 excess mortality count. For 2020 vehicular deaths dropped 18.2 percent, and the number of  
47 homicides fell 5.4 percent, causing Colombia's murder rate to reach its lowest level since  
48 1979.<sup>[39,40]</sup> In contrast, the United States excess mortality estimate for 2020 reflects in part a 7.2  
49  
50  
51  
52  
53  
54  
55  
56  
57  
58  
59  
60

percent increase in motor vehicle deaths, a 29.4 percent increase in homicides, and a 30.0 percent spike in drug overdose deaths.<sup>[41–43]</sup>

Official COVID-19 death reports and excess mortality estimates show broadly similar age patterns country-by-country. This finding, along with the fact that direct COVID-19 deaths account for the large share of excess mortality, suggests that the flatter profile of excess mortality in lower income countries is driven principally by direct COVID-19 deaths. To consider drivers of the direct COVID-19 age pattern it is useful to note that the age-specific mortality rate is the product of the age-specific cumulative infection rate (*IR*) and the age-specific cumulative infection fatality rate (*IFR*). Using a notation where  $N(x,i)$  is the population of the age group in country  $i$ ,  $D(x,i)$  is the number of deaths in the age group, and  $I(x,i)$  designates the cumulative number of infections of age group  $x$  in country  $i$ , this can be expressed as follows:

$$\begin{aligned} r(x,i) &= \frac{D(x,i)}{N(x,i)} = \frac{I(x,i)}{N(x,i)} * \frac{D(x,i)}{I(x,i)} \\ &= IR(x,i) * IFR(x,i) \end{aligned}$$

The greater flatness of direct COVID-19 age-specific mortality rates in lower income countries could result from differing patterns across countries by age of *IR*, *IFR*, or both. A number of studies have documented possible contributing factors to variation across countries in overall COVID-19 mortality and those same factors could generate different patterns in mortality by age.<sup>[14–18]</sup>

The relative *IR* of younger vs. older people may vary across countries for many reasons. First, in lower income countries, a large share of the population cannot work remotely.<sup>[44]</sup> Second, in developing countries, a lower share of older people are long-term care facility residents, who are at high risk for infection and death. One-quarter of recognized COVID-19 deaths during the first few months of the pandemic in the United Kingdom were residents of care facilities, and 31 percent of recognized COVID-19 deaths in the United States as of June 1, 2021 were care facility residents or staff.<sup>[45,46]</sup> Both of these characteristics of developing countries would tend to increase the relative risk of infection for younger people. On the other hand, in low- and middle-income countries, intergenerational households are more common. This means older people are more exposed to infection risk, particularly because in those countries people are more likely to live in crowded conditions. Roughly 20 percent of households in LMICs have at least one

1  
2  
3 household member under age 20 and one over age 60, as compared to just 5 percent in high-  
4 income countries.<sup>[47]</sup> In 54 LMICs with recent Demographic and Health Surveys, just half of the  
5 households have no more than two people per sleeping room.<sup>[17]</sup>  
6  
7

8  
9 Among those infected, age-specific IFRs may vary by age due to many different factors. One  
10 systematic review found that age-specific IFRs in developing countries were roughly 2 times  
11 higher than in high-income countries.<sup>[48]</sup> Country-level factors like the profile of comorbidities,  
12 differences in health system capacity, quality of care, infection prevention and control practices,  
13 and availability of personal protective equipment, could have age-specific effects on the  
14 IFR.<sup>[18,49]</sup> A form of survivor bias may be a factor as well. High quality medical care in wealthier  
15 countries keeps many older people alive despite weak health conditions that make them  
16 vulnerable to COVID-19. It may be that older people in developing countries are on average  
17 healthier than those in wealthier countries because those with ailments would have been at high  
18 risk for death at younger ages. If this is the case, older people in developing countries might be  
19 more resilient to the disease.  
20  
21  
22  
23  
24  
25  
26  
27

28  
29 Distinguishing various explanations for the observed age patterns of mortality identified in this  
30 paper should be a topic for further research. The analysis in this paper is also a reminder of the  
31 value of demographic data and in particular vital statistics as a tool amid the COVID-19 crisis.  
32 Excess mortality analysis by age presented here is only possible for countries that have well-  
33 functioning vital statistics systems and that have made their data widely available. Investments in  
34 vital statistics systems and greater data transparency should be encouraged as a global public  
35 good.  
36  
37  
38  
39  
40  
41  
42  
43  
44  
45  
46  
47  
48  
49  
50  
51  
52  
53  
54  
55  
56  
57  
58  
59  
60

## Acknowledgments

The authors express appreciation to Joshua Goldstein, Young Eun Kim, Ronald D. Lee, Norman Loayza, Andrew Noymer, Robert Oelrichs, Sharon Piza, and Philip Schellekens for helpful suggestions. The findings, interpretations, and conclusions in this paper are entirely those of the authors. They do not necessarily represent the views of the International Bank for Reconstruction and Development/World Bank and its affiliated organizations, or those of the Executive Directors of the World Bank or the governments they represent and are not intended to make any judgment on the legal or other status of geographic areas, or to prejudice the determination of any claims with respect to such area.

## Funding

None

## Author information

Affiliations

### *The World Bank, Human Development Global Practice*

Gabriel Demombynes ([gdemombynes@worldbank.org](mailto:gdemombynes@worldbank.org)), Paul Gubbins ([paul.gubbins@gmail.com](mailto:paul.gubbins@gmail.com)),  
Jeremy Veillard ([jveillard@worldbank.org](mailto:jveillard@worldbank.org))

### *The World Bank, Development Research Group*

Damien de Walque ([ddewalque@worldbank.org](mailto:ddewalque@worldbank.org))

### *School of Economics at Universidad Nacional de Colombia-Bogotá*

B. Piedad Urdinola ([bpurdinolac@unal.edu.co](mailto:bpurdinolac@unal.edu.co))

## Data availability statement

The data availability section in the online appendix describes the data sources used for this study. Upon acceptance a link to Github repository will be made available to facilitate replication.

## Author Contributions

The study and the methodology were conceived by GD, DdW, PG, BPU and JV. GD and PG conducted the formal analysis and validated the results. GD, DdW, PG, BPU and JV collaborated on writing the paper.

## Ethics Declaration

Ethics approval was not sought as the study presents results of an analysis of secondary data and does not involve human participants.

## Competing interests

The authors declare no competing interests.

1  
2  
3  
4  
5  
6  
7  
8  
9  
10  
11  
12  
13  
14  
15  
16  
17  
18  
19  
20  
21  
22  
23  
24  
25  
26  
27  
28  
29  
30  
31  
32  
33  
34  
35  
36  
37  
38  
39  
40  
41  
42  
43  
44  
45  
46  
47  
48  
49  
50  
51  
52  
53  
54  
55  
56  
57  
58  
59  
60

For peer review only

## References

1. Verity, R. *et al.* Estimates of the severity of coronavirus disease 2019: a model-based analysis. *Lancet Infect. Dis.* 2020: **20**, 669–677.
2. Sasson, I. Age and COVID-19 mortality: A comparison of Gompertz doubling time across countries and causes of death. *Demogr. Res.* 2021: **44**, 379–396.
3. Demombynes, G. COVID-19 Age-Mortality Curves Are Flatter in Developing Countries. World Bank Policy Research Working Paper. 2020. 9313.
4. Shapiro, V. COVID-19 Outbreaks and Age Mortality Patterns. 2020.
5. Goldstein, J. R. & Lee, R. D. Demographic perspectives on the mortality of COVID-19 and other epidemics. *Proc. Natl. Acad. Sci.* 2020: **117**, 22035–22041.
6. Sudharsanan, N., Didzun, O., Bärnighausen, T. & Geldsetzer, P. The Contribution of the Age Distribution of Cases to COVID-19 Case Fatality Across Countries: A Nine-Country Demographic Study. *Ann. Intern. Med.* 2020:**173**, 714–720.
7. Chauvin, J. P., Folwer, A. & Herrera, L. N. The Younger Age Profile of Covid-19 Deaths in Developing Countries. 2020. *Washington DC*.
8. Karlinsky, A. & Kobak, D. Tracking excess mortality across countries during the COVID-19 pandemic with the World Mortality Dataset. *Elife* 2021:**10**, e69336.
9. World Health Organization. Global excess deaths associated with COVID-19 (modelled estimates). May 5, 2022 Update. <https://www.who.int/data/sets/global-excess-deaths-associated-with-covid-19-modelled-estimates>
10. Knutson, V., Aleshin-Guendel, S., Karlinsky, A., Msemburi, W. and Wakefield, J., 2022. Estimating Global and Country-Specific Excess Mortality During the COVID-19 Pandemic. *arXiv preprint arXiv:2205.09081*.

- 1  
2  
3 11. Aburto, J.M., Jonas Schöley, Ilya Kashnitsky, Luyin Zhang, Charles Rahal, Trifon I Missov,  
4  
5 Melinda C Mills, Jennifer B Dowd, Ridhi Kashyap, Quantifying impacts of the COVID-19  
6  
7 pandemic through life-expectancy losses: a population-level study of 29  
8  
9 countries, *International Journal of Epidemiology*, 2021,  
10  
11
- 12 12. Islam N, Jdanov D A, Shkolnikov V M, Khunti K, Kawachi I, White M et al. Effects of  
13  
14 covid-19 pandemic on life expectancy and premature mortality in 2020: time series analysis in  
15  
16 37 countries *BMJ* 2021: 375:e066768  
17  
18
- 19 13. Castro, M.C., Gurzenda, S., Turra, C.M. *et al.* Reduction in life expectancy in Brazil after  
20  
21 COVID-19. *Nat Med* 2021: **27**, 1629–1635.  
22  
23
- 24 14. Schellekens, I. G. and P. COVID-19 is a developing country pandemic. *Brookings*  
25  
26 [https://www.brookings.edu/blog/future-development/2021/05/27/covid-19-is-a-developing-](https://www.brookings.edu/blog/future-development/2021/05/27/covid-19-is-a-developing-country-pandemic/)  
27  
28 [country-pandemic/](https://www.brookings.edu/blog/future-development/2021/05/27/covid-19-is-a-developing-country-pandemic/) (2021).  
29  
30
- 31 15. Schellekens, P. & Sourrouille, D. M. COVID-19 Mortality in Rich and Poor Countries: A  
32  
33 Tale of Two Pandemics? World Bank Policy Research Working Paper 2020: 9260.  
34  
35
- 36 16. Walker, P. G. *et al.* The impact of COVID-19 and strategies for mitigation and  
37  
38 suppression in low-and middle-income countries. *Science* 2020: 369, 413–422 2020.  
39  
40
- 41 17. Brown, C. S., Ravallion, M. & van de Walle, D. *Can the World's Poor Protect*  
42  
43 *Themselves from the New Coronavirus?* 2020.  
44  
45
- 46 18. Ghisolfi, S. *et al.* Predicted COVID-19 fatality rates based on age, sex, comorbidities and  
47  
48 health system capacity. *BMJ Glob. Health* 2020: **5**, e003094.  
49  
50
- 51 19. Ashton M Verdery, PhD, Lauren Newmyer, MA, Brandon Wagner, PhD, Rachel Margolis,  
52  
53 PhD, National Profiles of Coronavirus Disease 2019 Mortality Risks by Age Structure and  
54  
55  
56  
57  
58  
59  
60

Preexisting Health Conditions, *The Gerontologist*, Volume 61, Issue 1, February 2021, Pages 71–77, <https://doi.org/10.1093/geront/gnaa152>

[dataset] 20. Riffe, T., Acosta, E., & the COVERAGE-DB team. Data Resource Profile:

COVERAGE-DB: a global demographic database of COVID-19 cases and deaths. *Int. J. Epidemiol.* 2021: **50**, 390–390f. <https://doi.org/10.1093/ije/dyab027>

21. Hannah Ritchie, Edouard Mathieu, Lucas Rodés-Guirao, Cameron Appel, Charlie Giattino, Esteban Ortiz-Ospina, Joe Hasell, Bobbie Macdonald, Diana Beltekian and Max Roser (2020) - "Coronavirus Pandemic (COVID-19)". *Published online at OurWorldInData.org*. Retrieved from: '<https://ourworldindata.org/coronavirus>' [Online Resource]

22. Jdanov, D. A. *et al.* The short-term mortality fluctuation data series, monitoring mortality shocks across time and space. *Sci. Data* 2021: **8**, 235.

[dataset] 23. Human Mortality Database. University of California, Berkeley (USA), and Max Planck Institute for Demographic Research (Germany). Available at [www.mortality.org](http://www.mortality.org) or [www.humanmortality.de](http://www.humanmortality.de) (data downloaded on February 18, 2022).

[dataset] 24. DANE. 2022. Defunciones No Fetales. Dirección Nacional de Estadística, Bogotá, Colombia. <https://www.dane.gov.co/index.php/estadisticas-por-tema/salud/nacimientos-y-defunciones/defunciones-no-fetales> (data downloaded on February 18, 2022).

[dataset] 25. INEGI. 2022. Defunciones Registrada mortalidad general. Instituto Nacional de Estadística, Geografía e Informática (INEGI), Aguascalientes, Mexico. <https://www.inegi.org.mx/programas/mortalidad/#Microdatos> (data downloaded on February 18, 2022).

[dataset] 26. SINADef. 2022. Certificado Defunciones. Sistema Informato de Defunciones. Lima, Peru: <https://www.datosabiertos.gob.pe/dataset/sinadef-certificado->



1  
2  
3 [defunciones/resource/fef60d30-c135-4b51-82e1-a642ef29fe79](https://defunciones/resource/fef60d30-c135-4b51-82e1-a642ef29fe79) (data downloaded on February  
4  
5 18, 2022).

6  
7  
8 [dataset] 27. Ministério da Saúde. 2022. Mortalidade – Brasil. Ministério da Saúde, Brasília,  
9  
10 Brazil. <http://tabnet.datasus.gov.br/cgi/deftohtm.exe?sim/cnv/obt10uf.def> (data downloaded on  
11  
12 February 18, 2022).

13  
14  
15  
16  
17 28. DESA, U. World Population Prospects 2019. United Nations. Department of Economic  
18  
19 and Social Affairs. 2019. *World Popul. Prospects 2019*.

20  
21  
22 29. Beaney, T. *et al.* Excess mortality: the gold standard in measuring the impact of COVID-  
23  
24 19 worldwide? *J. R. Soc. Med.* 2020: **113**, 329–334.

25  
26  
27 30. Nepomuceno, M.R., Klimkin, I., Jdanov, D.A., Alustiza-Galarza, A. and Shkolnikov, V.M.  
28  
29 (2022). Sensitivity Analysis of Excess Mortality due to the COVID-19 Pandemic. *Population*  
30  
31 and Development Review. <https://doi.org/10.1111/padr.12475>

32  
33  
34 31. Schöley, J. (2021). Robustness and bias of European excess death estimates in 2020 under  
35  
36 varying model specifications. *MedRxiv*. <https://doi.org/10.1101/2021.06.04.21258353>

37  
38 32. Brillinger, D. R. (1986). A biometrics invited paper with discussion: The natural variability  
39  
40 of vital rates and associated statistics. *Biometrics*, 42(4):693–734.

41  
42  
43 33. Gompertz, B. (1825). On the nature of the function expressive of the law of human mortality,  
44  
45 and on a new mode of determining the value of life contingencies. *Philosophical Transactions*  
46  
47 of the Royal Society of London, 115:513–583.

48  
49  
50 34. Santos, A. M. dos, Souza, B. F. de, Carvalho, C. A. de, Campos, M. A. G., Oliveira, B. L. C.  
51  
52 A. de, Diniz, E. M., Branco, M. dos R. F. C. ., Queiroz, R. C. de S. ., Carvalho, V. A. de,  
53  
54 Araújo, W. R. M., & Silva, A. A. M. da. (2021). Excess deaths from all causes and by

COVID-19 in Brazil in 2020. *Revista De Saúde Pública*, 55, 71.

<https://doi.org/10.11606/s1518-8787.2021055004137>

35. Hillis, S. D. *et al.* Global minimum estimates of children affected by COVID-19-associated orphanhood and deaths of caregivers: a modelling study. *The Lancet* 2021: **398**, 391–402.
36. Bundervoet, T., Dávalos, M. E. & Garcia, N. *The Short-Term Impacts of COVID-19 on Households in Developing Countries: An Overview Based on a Harmonized Data Set of High-Frequency Surveys*. The World Bank, 2021. doi:10.1596/1813-9450-9582.
37. Miguel, E. & Mobarak, A. M. The Economics of the COVID-19 Pandemic in Poor Countries. *Annu. Rev. Econ.* 2021 doi:<https://doi.org/10.1146/annurev-economics-051520-025412>.
38. Azevedo, J. P., Hasan, A., Goldemberg, D., Geven, K. & Iqbal, S. A. Simulating the potential impacts of COVID-19 school closures on schooling and learning outcomes: A set of global estimates. *World Bank Res. Obs.* 2021: **36**, 1–40.
39. Departamento Administrativo Nacional de Estadística. Cuadros unificados: Defunciones no fatales cifras definitivas 2019. 2020.
40. Departamento Administrativo Nacional de Estadística. Cuadros unificados: Defunciones no fatales acumulado año 2020pr. 2021.
41. National Center for Statistics and Analysis. Early Estimate of Motor Vehicle Traffic Fatalities in 2020. 2021.
42. Krishnakumar, P. Murders rose sharply in 2020 but data is lacking across much of the country. 2021.
43. National Center for Health Statistics. Provisional Drug Overdose Death Counts. 2021.

- 1  
2  
3 44. Garrote Sanchez, D. *et al.* Who on earth can work from home? 2020.  
4  
5 45. Public Health England. *Disparities in the risk and outcomes of COVID-19*. 2020.  
6  
7 46. The New York Times, Nearly One-Third of U.S. Coronavirus Deaths Are Linked to  
8  
9 Nursing Homes. *The New York Times*. 2020.  
10  
11 47. Winskill, P. *et al.* *Report 22: Equity in response to the COVID-19 pandemic: an*  
12  
13 *assessment of the direct and indirect impacts on disadvantaged and vulnerable populations in*  
14  
15 *low-and lower middle-income countries WHO Collaborating Centre for Infectious Disease*  
16  
17 *Modelling MRC Centre for Global Infectious Disease Analysis*. 2020.  
18  
19 48. Levin AT, Owusu-Boaitey N, Pugh S, *et al.* Assessing the burden of COVID-19 in  
20  
21 developing countries: systematic review, meta-analysis and public policy implications *BMJ*  
22  
23 *Global Health* 2022;**7**:e008477.  
24  
25 49. Nepomuceno, M. R. *et al.* Besides population age structure, health and other  
26  
27 demographic factors can contribute to understanding the COVID-19 burden. 2020. *Proc. Natl.*  
28  
29 *Acad. Sci.* **117**, 13881–13883.  
30  
31  
32  
33  
34  
35  
36  
37  
38  
39  
40  
41  
42  
43  
44  
45  
46  
47  
48  
49  
50  
51  
52  
53  
54  
55  
56  
57  
58  
59  
60

### Figures Legend/Caption

Figure 1: Actual and predicted total deaths (all causes) by year, select countries in LAC

Figure 2: Age distribution of official COVID-19 deaths and excess deaths in 2020

Figure 3: Hypothetical age distribution of official COVID-19 and excess deaths in 2020, using country age-specific mortality rates and the US population age distribution

Figure 4: Official COVID-19 vs excess deaths by age group (per 100,000 population) [log scale]

Figure 5: Official COVID-19 vs excess deaths by age group, select Latin American countries and the United States (per 100,000 population)

Figure 6: Slope of the age-mortality curve vs GNI per capita, official COVID-19 deaths vs excess deaths, all data Poisson model (estimates use all age group and deaths recoded to 0 where they are negative)

Figure 7: Slope of the age-mortality curve vs GNI per capita, official COVID-19 deaths vs excess deaths common set of countries/economies. Poisson model (estimates use all age group and deaths recoded to 0 where they are negative)

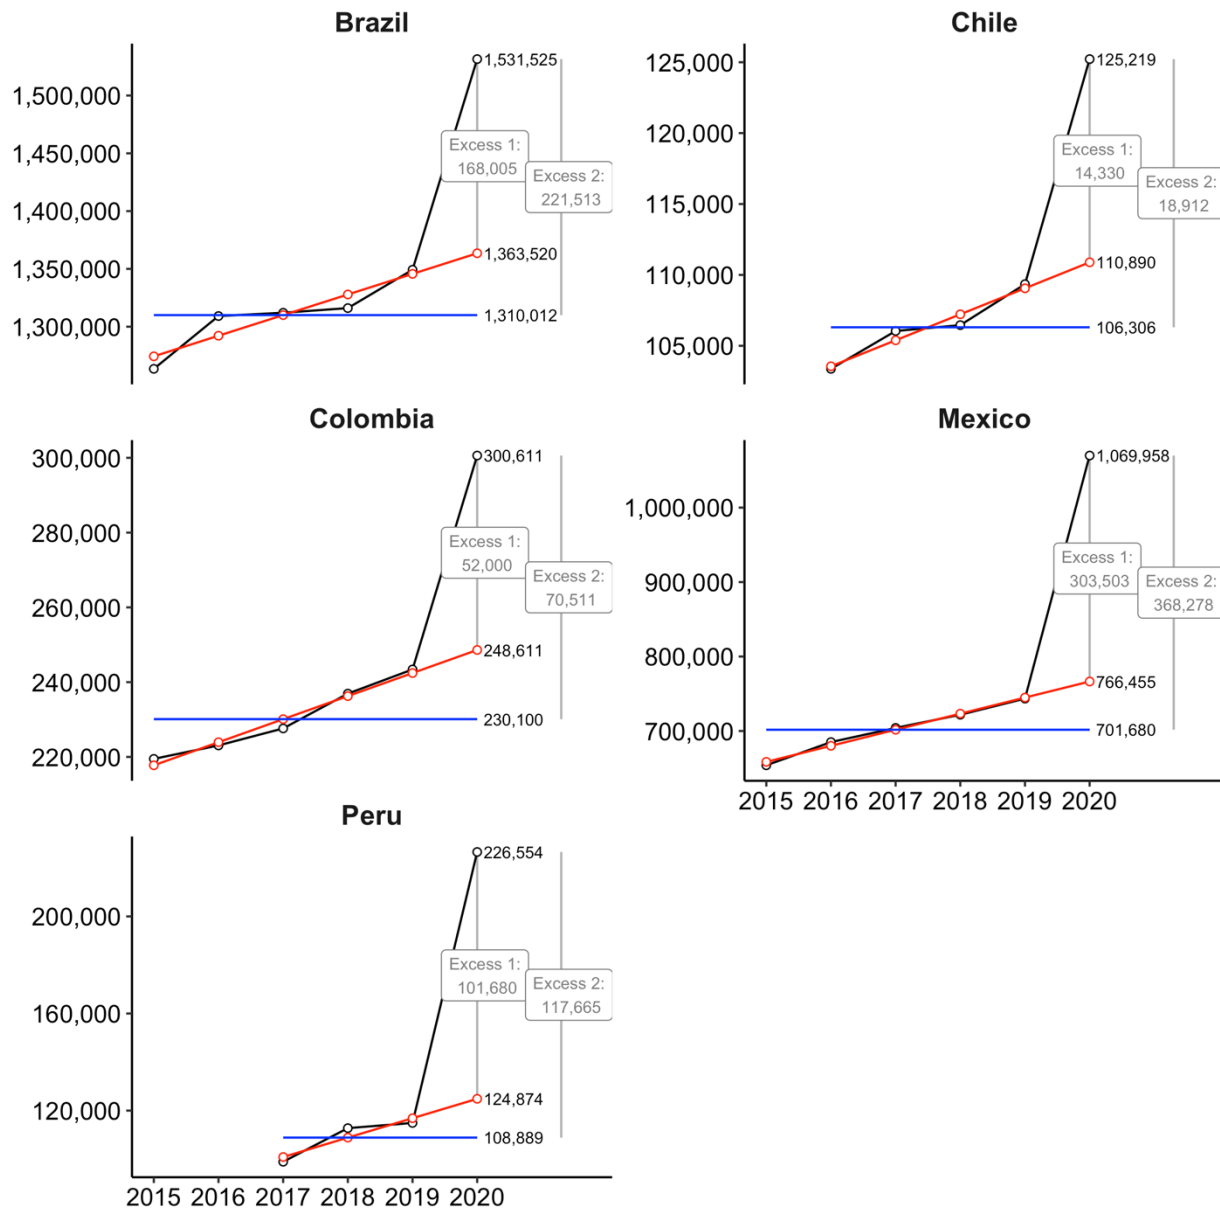

Notes: Actual deaths are shown in black. Predicted deaths based on a linear projection using annual mortality totals 2015-19 are shown in red. Mean deaths 2015-19 are shown in blue.

Figure 1: Actual and predicted total deaths (all causes) by year, select countries in LAC

1  
2  
3  
4  
5  
6  
7  
8  
9  
10  
11  
12  
13  
14  
15  
16  
17  
18  
19  
20  
21  
22  
23  
24  
25  
26  
27  
28  
29  
30  
31  
32  
33  
34  
35  
36  
37  
38  
39  
40  
41  
42  
43  
44  
45  
46  
47  
48  
49  
50  
51  
52  
53  
54  
55  
56  
57  
58  
59  
60

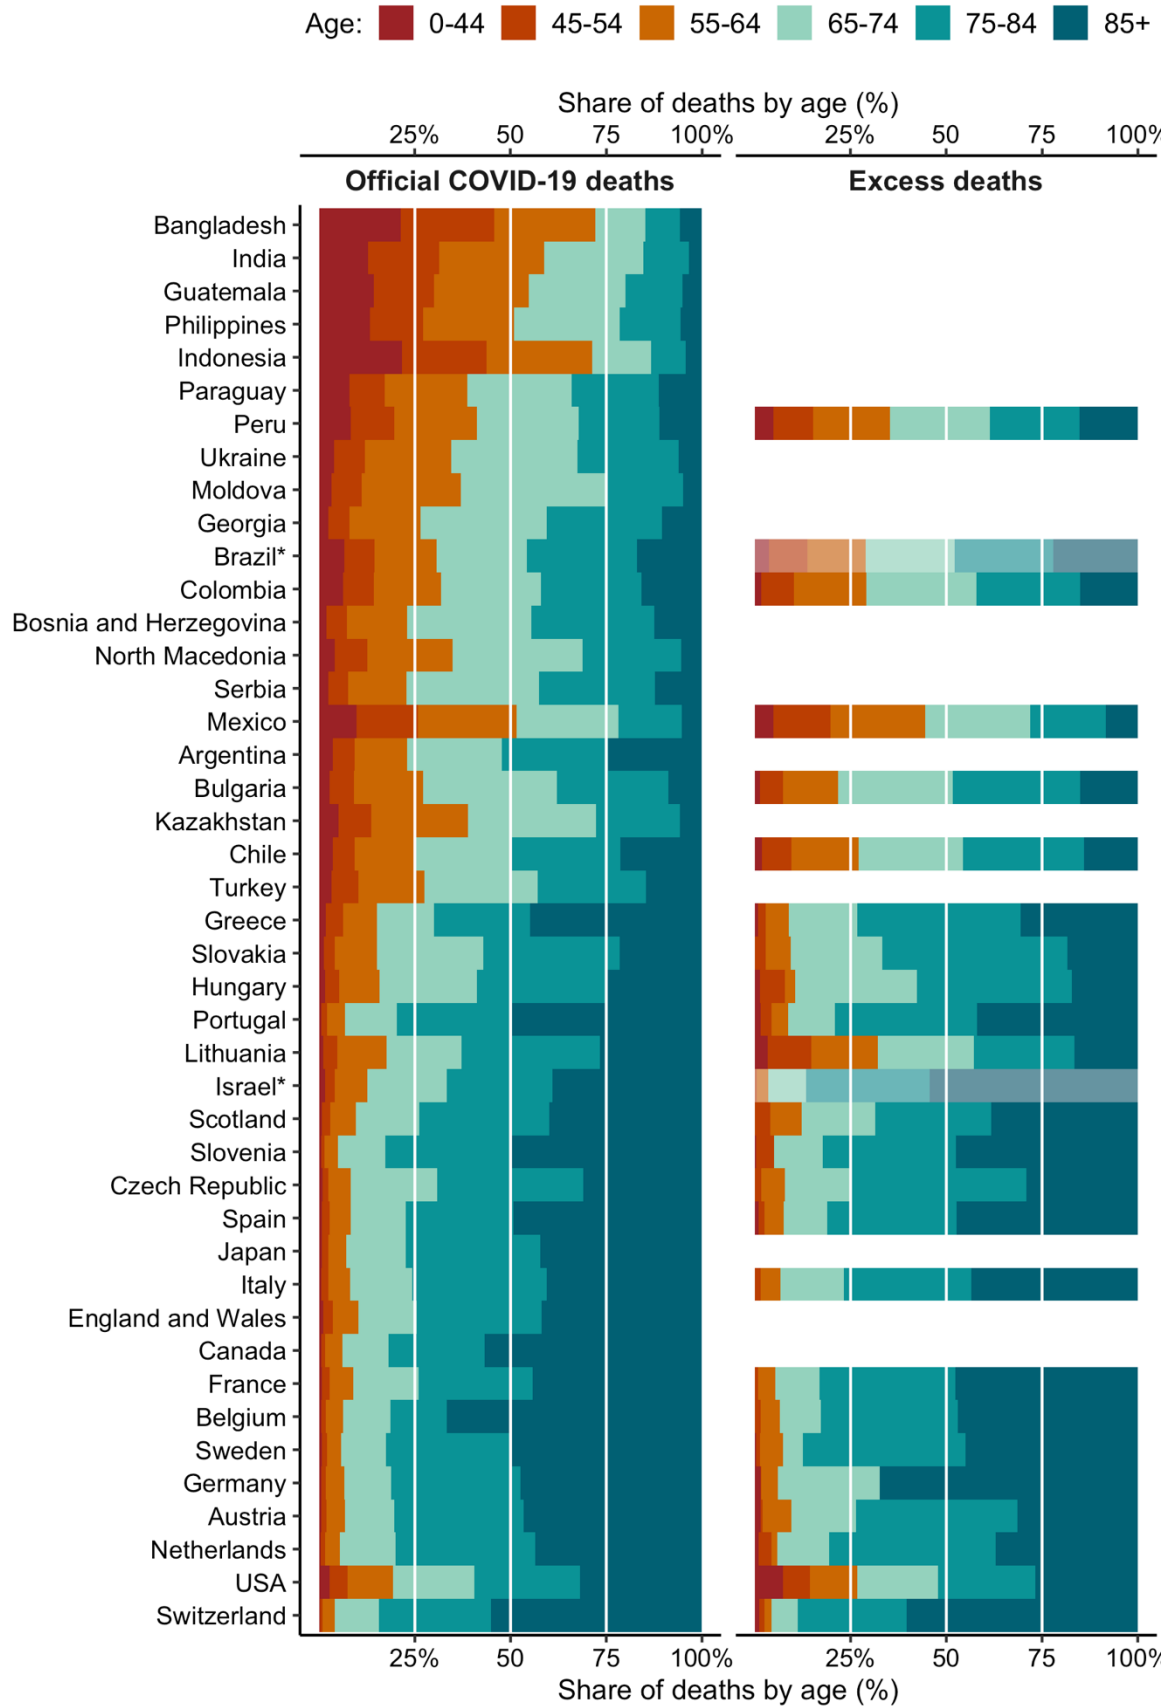

1  
2  
3 Notes: Countries with fewer than 2000 official COVID-19 deaths are excluded. The age-groups available to  
4 compute excess deaths for Brazil and Israel differ from those available in other countries. For Brazil and Israel,  
5 the age groups are: 0-39, 40-49, 50-59, 60-69, 70-79, 80+. Negative excess deaths estimated in the Philippines  
6 (age-groups 0-44 75-84 and 85+), Slovenia (55-64) and Scotland (0-44) are re-coded to zero. Countries are sorted  
7 by 2019 GNI per capita (PPP).  
8

9 Figure 2: Age distribution of official COVID-19 deaths and excess deaths in 2020  
10  
11  
12  
13  
14  
15  
16  
17  
18  
19  
20  
21  
22  
23  
24  
25  
26  
27  
28  
29  
30  
31  
32  
33  
34  
35  
36  
37  
38  
39  
40  
41  
42  
43  
44  
45  
46  
47  
48  
49  
50  
51  
52  
53  
54  
55  
56  
57  
58  
59  
60

1  
2  
3  
4  
5  
6  
7  
8  
9  
10  
11  
12  
13  
14  
15  
16  
17  
18  
19  
20  
21  
22  
23  
24  
25  
26  
27  
28  
29  
30  
31  
32  
33  
34  
35  
36  
37  
38  
39  
40  
41  
42  
43  
44  
45  
46  
47  
48  
49  
50  
51  
52  
53  
54  
55  
56  
57  
58  
59  
60

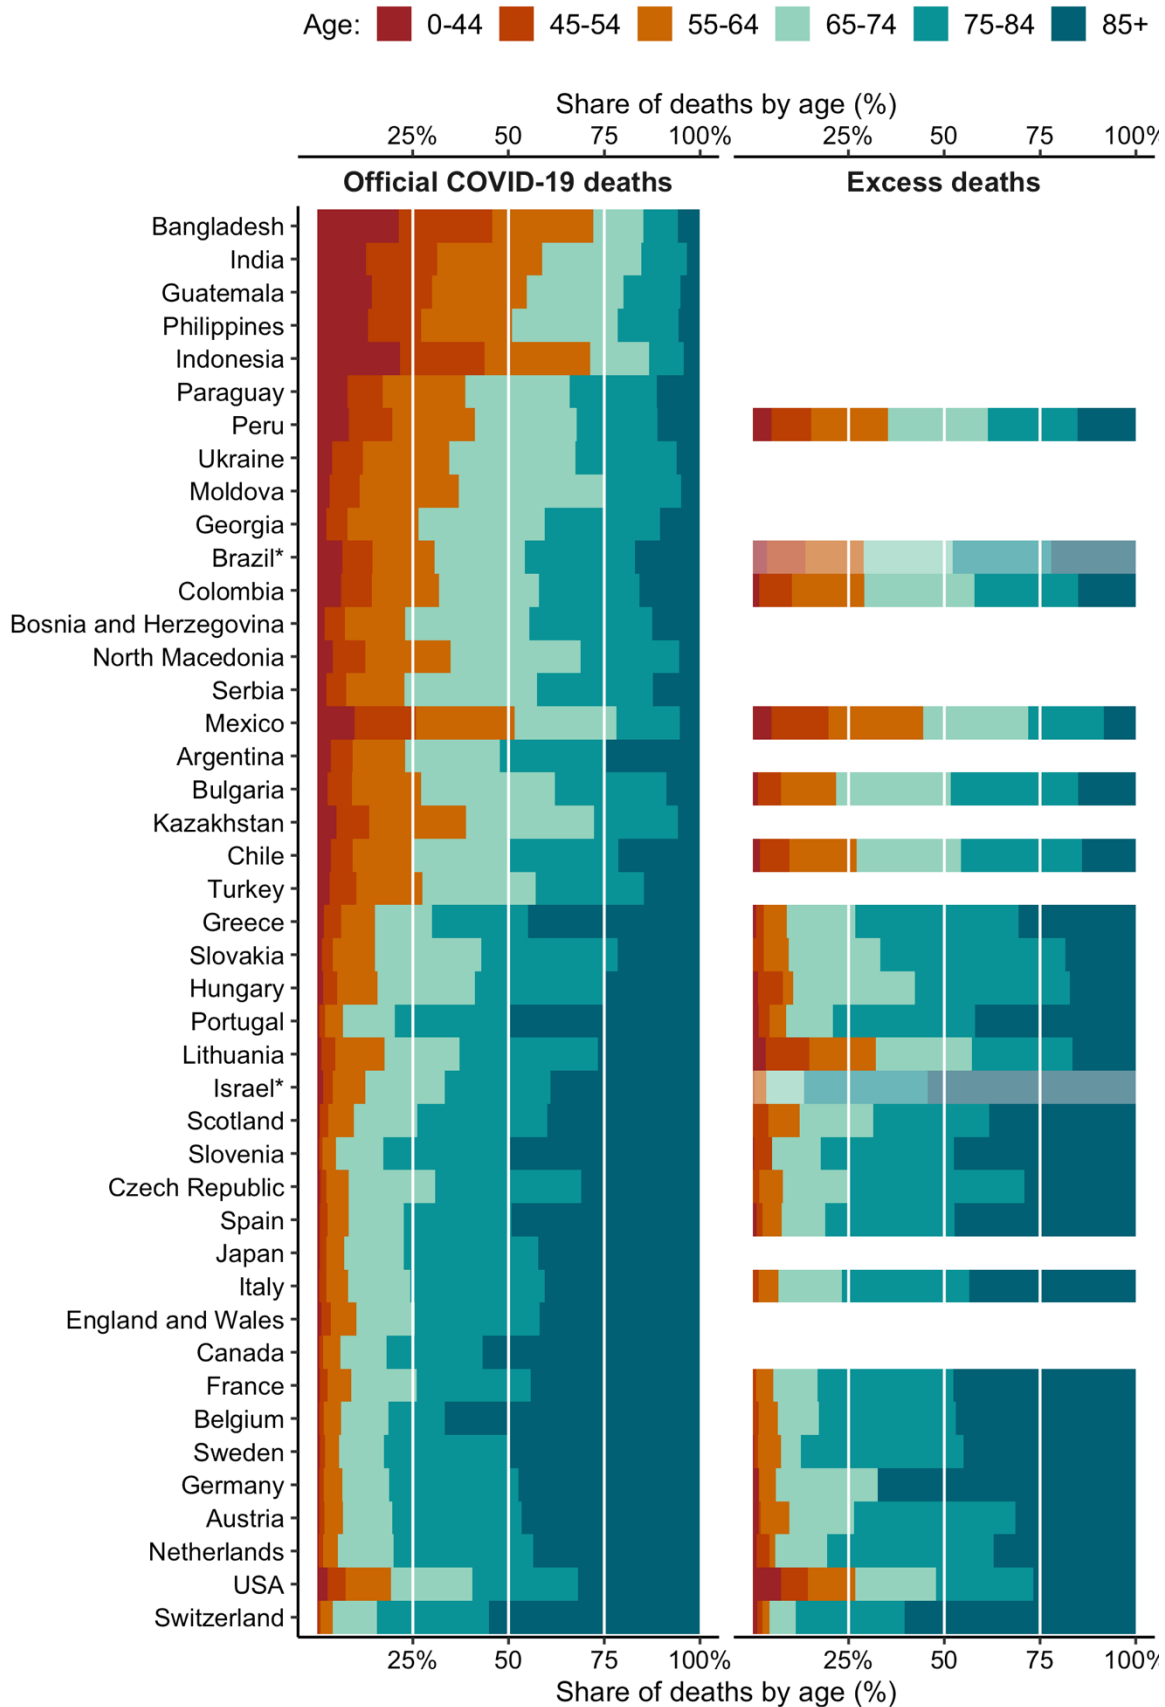



1  
2  
3 Notes: Countries with fewer than 2000 official COVID-19 deaths are excluded. The age-groups available to  
4 compute excess deaths for Brazil and Israel differ from those available in other countries. For Brazil and Israel,  
5 the age groups are: 0-39, 40-49, 50-59, 60-69, 70-79, 80+; Negative excess deaths estimated in the Philippines  
6 (age-groups 0-44 75-84 and 85+), Slovenia (55-64) and Scotland (0-44) are re-coded to zero. Countries are sorted  
7 by 2019 GNI per capita (PPP).  
8

9 Figure 3: Hypothetical age distribution of official COVID-19 and excess deaths in 2020,  
10 using country age-specific mortality rates and the US population age distribution  
11  
12  
13  
14  
15  
16  
17  
18  
19  
20  
21  
22  
23  
24  
25  
26  
27  
28  
29  
30  
31  
32  
33  
34  
35  
36  
37  
38  
39  
40  
41  
42  
43  
44  
45  
46  
47  
48  
49  
50  
51  
52  
53  
54  
55  
56  
57  
58  
59  
60

Source of death data: ○ Official COVID-19 deaths ○ Excess deaths

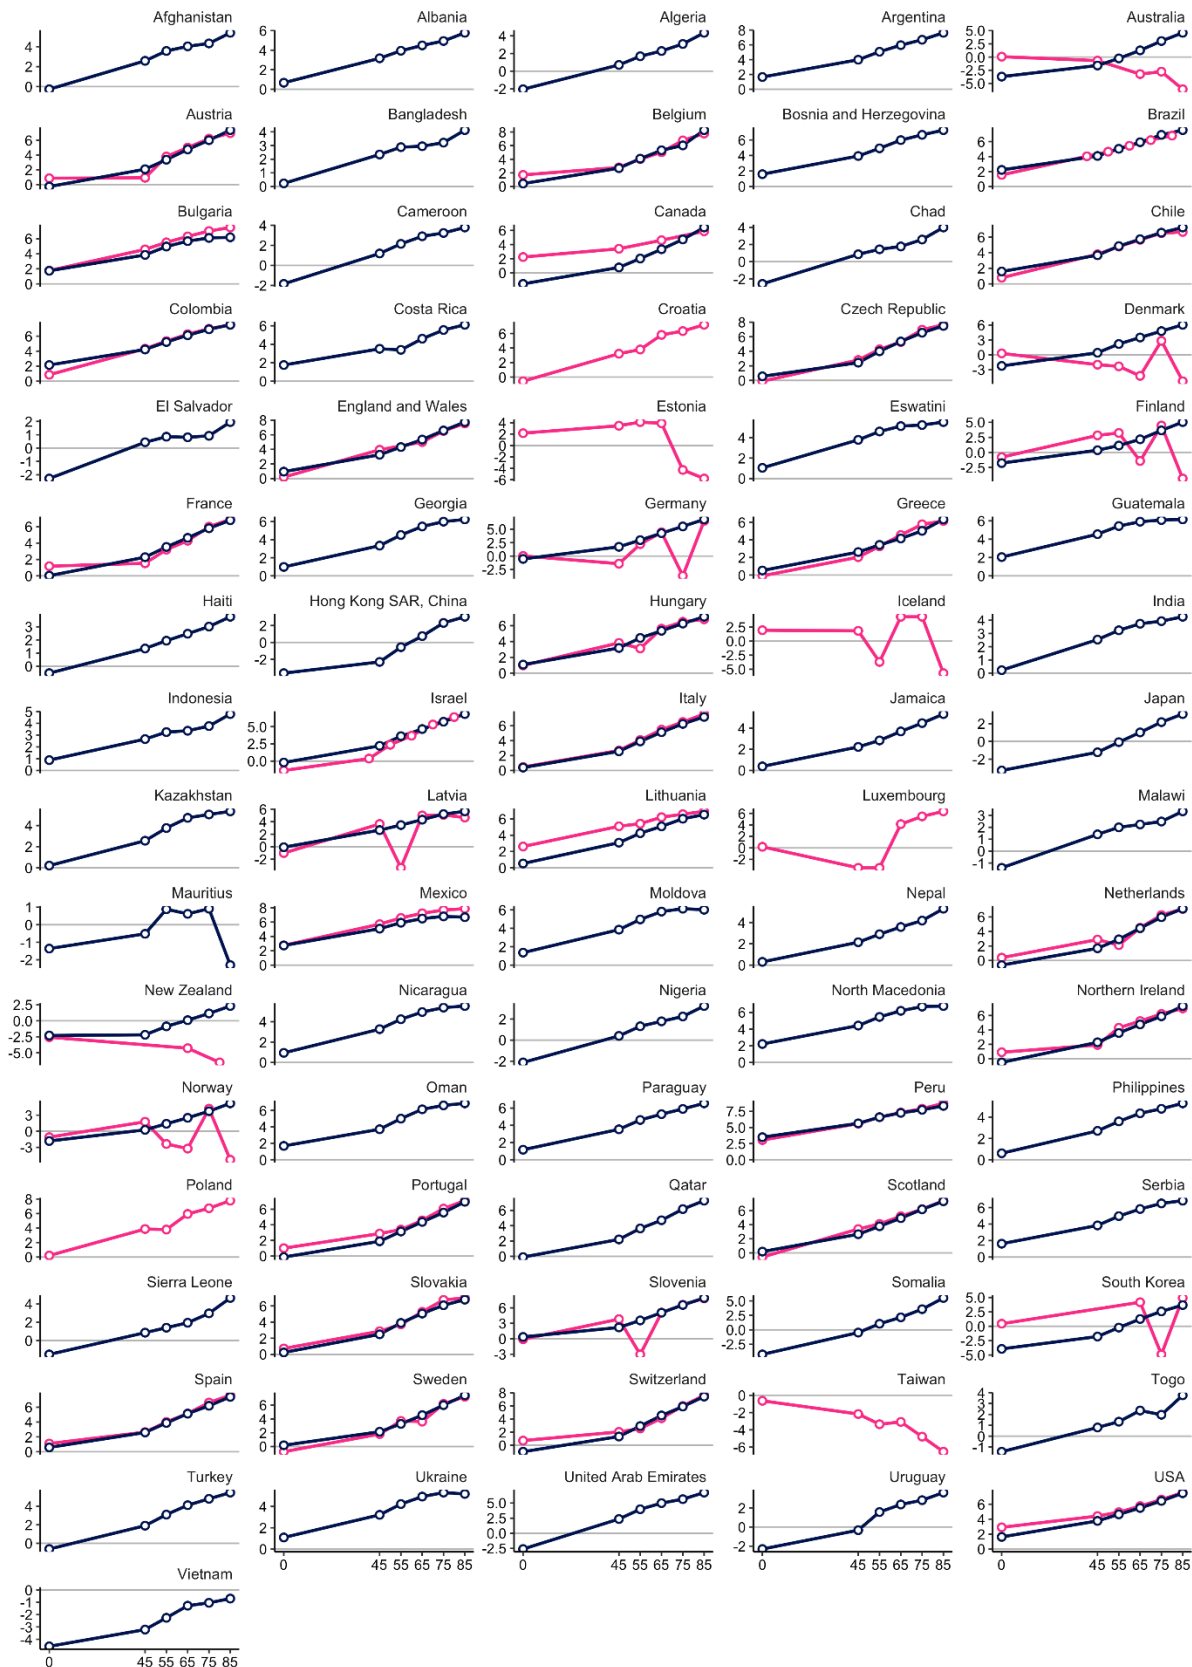

1  
2  
3 Note: Points are plotted at the start of each age group: 0-44,45-54,55-64,65-74,75-84, 85+  
4 Vertical axis labels are expressed as log (deaths/100,000 population).  
5

6 Figure 4: Official COVID-19 vs excess deaths by age group (per 100,000 population) [log  
7 scale]  
8  
9  
10  
11  
12  
13  
14  
15  
16  
17  
18  
19  
20  
21  
22  
23  
24  
25  
26  
27  
28  
29  
30  
31  
32  
33  
34  
35  
36  
37  
38  
39  
40  
41  
42  
43  
44  
45  
46  
47  
48  
49  
50  
51  
52  
53  
54  
55  
56  
57  
58  
59  
60

Log scale

○ Expected all-cause deaths ● Official COVID-19 deaths ○ Excess deaths

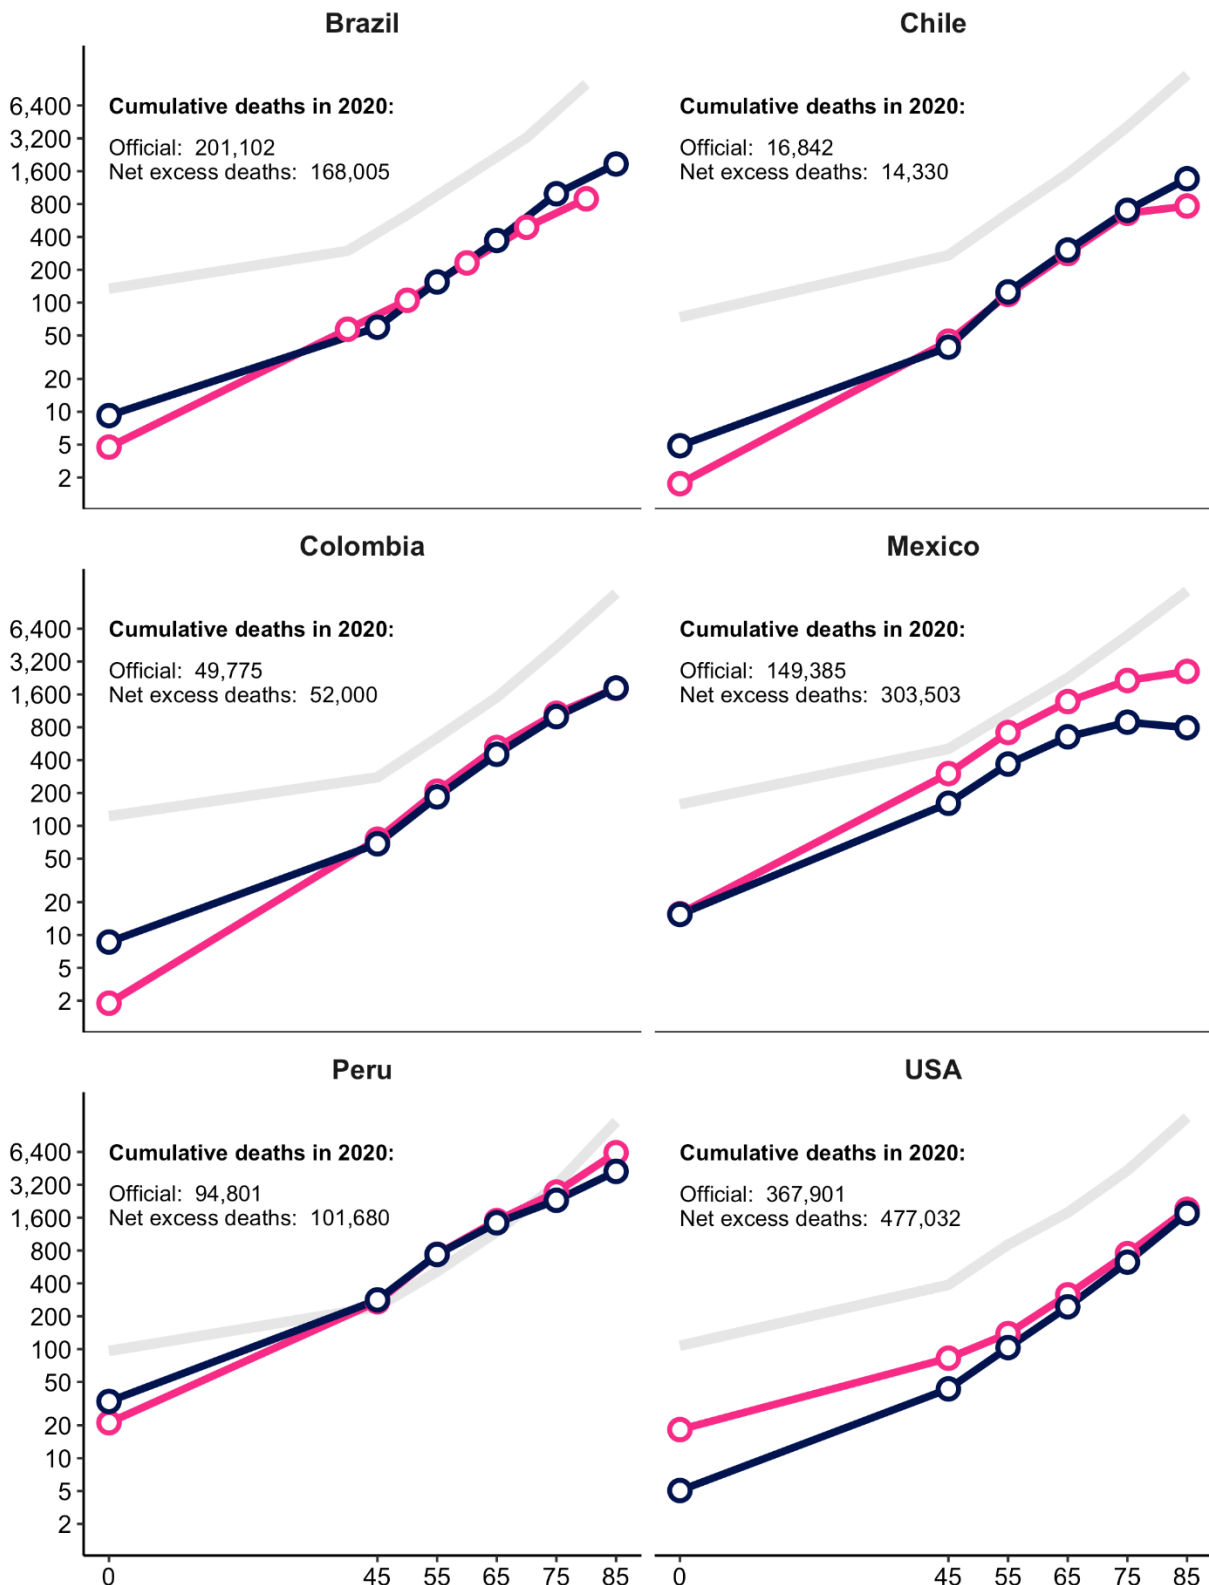

1  
2  
3  
4 Note: Points are plotted at the start of each age group: 0-44,45-54,55-64,65-74,75-84, 85+. Brazil has  
5 different age group categories. The excess mortality calculation for Chile is based on the first 52 weeks  
6 of the ISO calendar year and thus excludes the last 4 days of the calendar year.  
7

8  
9 Figure 5: Official COVID-19 vs excess deaths by age group, select Latin American countries  
10 and the United States (per 100,000 population)  
11  
12  
13  
14  
15  
16  
17  
18  
19  
20  
21  
22  
23  
24  
25  
26  
27  
28  
29  
30  
31  
32  
33  
34  
35  
36  
37  
38  
39  
40  
41  
42  
43  
44  
45  
46  
47  
48  
49  
50  
51  
52  
53  
54  
55  
56  
57  
58  
59  
60

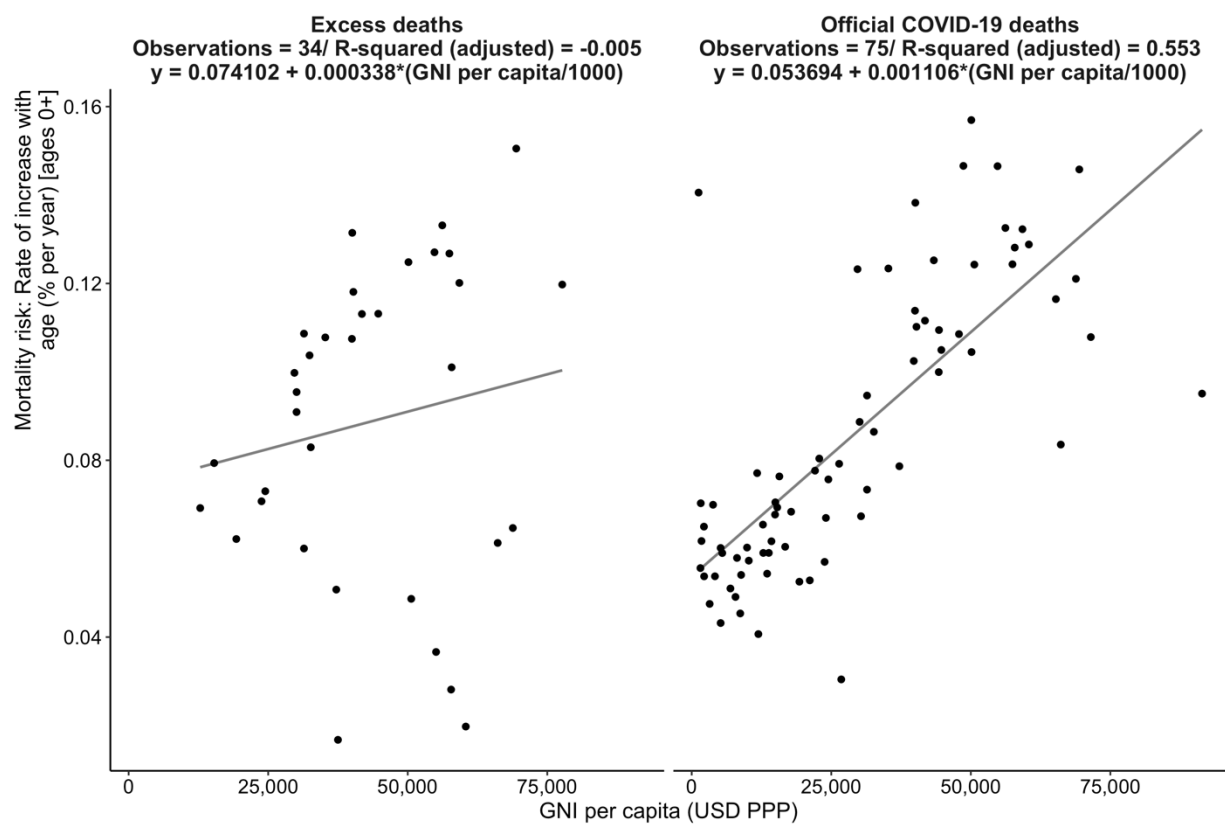

Figure 6: Slope of the age-mortality curve vs GNI per capita, official COVID-19 deaths vs excess deaths, all data Poisson model (estimates use all age group and deaths recoded to 0 where they are negative)

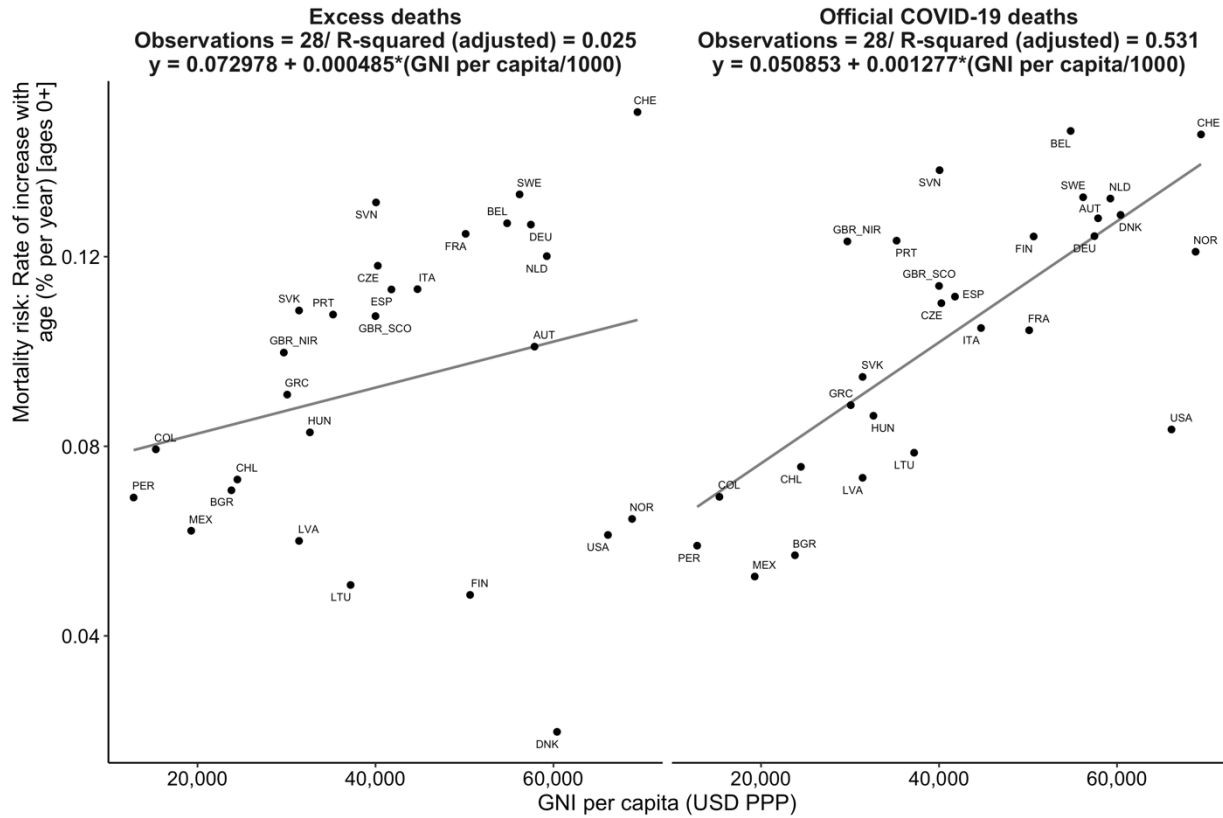

Figure 7: Slope of the age-mortality curve vs GNI per capita, official COVID-19 deaths vs excess deaths common set of countries/economies. Poisson model (estimates use all age group and deaths recoded to 0 where they are negative)

## *Online Appendix*

### **Data Availability**

#### *Data sources*

Official reported COVID-19 deaths aggregated in the COVERAGE database (Output\_5.zip Version 395 downloaded May 16, 2022 from <https://osf.io/7tnfh/>). For this analysis the output file with death counts aggregated to 5-year age-groups is used <sup>[20]</sup>.

There are 125 countries in the COVERAGE database (excluding England and United Kingdom). For this analysis, the political units that make up the United Kingdom are treated separately as follows: England and Wales, Scotland, and Northern Ireland.

85 countries have at least one record of cumulative deaths during 2020.

76 countries have a record of cumulative deaths that covers at least 6 months since the first case was detected in the country (per case-data derived from Our World in Data). Countries with an “exposure” of less than 6 months as of the end of 2020 are excluded from the analysis.

The following is the set of 76 countries and economies with official reported deaths used in the analysis: Afghanistan; Albania; Algeria; Argentina; Australia; Austria; Bangladesh; Belgium; Bosnia and Herzegovina; Brazil; Bulgaria; Cameroon; Canada; Chad; Chile; Colombia; Costa Rica; Czech Republic; Denmark; El Salvador; England and Wales; Eswatini; Finland; France; Georgia; Germany; Greece; Guatemala; Haiti; Hong Kong SAR, China; Hungary; India; Indonesia; Israel; Italy; Jamaica; Japan; Jordan; Kazakhstan; Latvia; Lithuania; Malawi; Mauritius; Mexico; Moldova; Nepal; Netherlands; New Zealand; Nicaragua; Nigeria; North Macedonia; Northern Ireland; Norway; Oman; Paraguay; Peru; Philippines; Portugal;; Qatar; Scotland; Serbia; Sierra Leone; Slovak Republic; Slovenia; Somalia; Republic of Korea; Spain; Sweden; Switzerland; Togo; Turkey; Ukraine; United Arab Emirates; Uruguay; United States; Vietnam.

**Excess all-cause deaths from vital statistics records**, from the following sources:

Short term mortality fluctuations (STMF) harmonized data series from the Human Mortality Database <sup>[23]</sup>, downloaded February 18, 2022 from <https://www.mortality.org>

For Colombia, Peru, Mexico, Brazil and the USA all cause death data are sources from national statistical authorities.



- For this analysis, the STMF input files are used. These input files cover 38 countries and economies: Australia; Austria; Belgium; Bulgaria; Canada; Switzerland; Chile; Czech Republic; Germany; Denmark; Spain; Estonia; Finland; France; Northern Ireland; Scotland; England and Wales; Greece; Croatia; Hungary; Iceland; Israel; Italy; Republic of Korea; Lithuania; Luxembourg; Latvia; Netherlands; Norway; New Zealand; Poland; Portugal; Russian Federation; Slovak Republic; Slovenia; Sweden; Taiwan, China; United States.
- Russia does not have data for 2020.
- Chile and Germany do not have data for 2015.

Colombia vital statistics tabulations (*Defunciones no fetales*) were compiled by DANE. 2019 and 2020 tabulations are preliminary <sup>[24]</sup>.

Mexico vital statistics microdata are those compiled by INEGI (*Defunciones registradas, mortalidad general*) and cover 2015-2020 <sup>[25]</sup>.

Peru death certificate microdata were compiled by SINADEF <sup>[26]</sup> obtained through the government's open data portal. These data cover 2017-2021.

Brazil vital statistics tabulations are obtained from the Ministry of Health's Sistema de Informação sobre Mortalidade (SIM) data portal <sup>[27]</sup>  
<http://tabnet.datasus.gov.br/cgi/deftohtm.exe?sim/cnv/obt10uf.def>

Together there are 41 countries and economies with excess death estimates: Austria; Belgium; Brazil; Bulgaria; Switzerland; Chile; Czech Republic; Germany; Denmark; Spain; Estonia; Finland; France; Scotland; Greece; Croatia; Hungary; Iceland; Italy; Lithuania; Luxembourg; Latvia; Netherlands; Norway; Poland; Portugal; Slovak Republic; Slovenia; Sweden; Taiwan, Colombia; Peru; Mexico; England and Wales; United States; Australia; Canada; Israel; Republic of Korea; New Zealand.

Of these, four do not have corresponding official death records from the coverage database: Estonia, Croatia, Luxembourg, and Poland.

1  
2  
3 For all countries, the official COVID-19 death data is drawn from the COVerAGE database and  
4 the figures correspond to calendar year 2020. The excess mortality estimates are based  
5 principally on all-cause data compiled in the Short Term Mortality Fluctuations (STMF)  
6 database and reported in terms of deaths by week, using weeks as defined by the International  
7 Organization for Standardization (ISO) weeks. All ISO weeks start on a Monday and end on a  
8 Sunday and thus do not conform precisely to the calendar year. There are 52 ISO weeks in most  
9 years but 53 ISO weeks in 2015 and 2020. Including all 53 ISO weeks for 2020 in the excess  
10 mortality calculations would result in an overestimate of excess mortality. In order to ensure that  
11 the excess mortality calculations are based on an identical number of days in each year, we use  
12 the first 52 weeks of each year, excluding week 53 from the calculations for 2015 and 2020 for  
13 all cases where the data comes from STMF. The 52-week ISO year for 2020 thus starts  
14 December 30, 2019, and ends December 27, 2020. For the Brazil, Colombia, Mexico, Peru and  
15 United States excess mortality estimates, which are based on data sourced directly to national  
16 statistical agencies, we use the full calendar year.  
17  
18

19  
20  
21 The preferred age group categories for the analyses conducted in this paper were as follows: 0-  
22 14, 15-44, 45-54, 55-64, 65-74, 75-84, 85+. However, since the reporting of all-cause deaths by  
23 age used by the Human Mortality Database is not consistent from country to country (not all  
24 countries report death counts tabulated at 5-year intervals or less), successively broader age-  
25 groupings are used in cases where the preferred age groups could not be constructed directly  
26 from the STMF input data. These countries include the United States, England and Wales,  
27 Australia, Canada, New Zealand, Israel and the Republic of Korea. We compute excess mortality  
28 rates for all unique country-age group combinations (as shown in Figure 4) but to estimate the  
29 age gradient of mortality, we only include countries for which we could construct the preferred  
30 age-group categories as described above. Countries for which we could not construct the  
31 preferred age-group categories are Brazil, Israel, and New Zealand. To avoid excluding the  
32 United States from this analysis, we use mortality data from the CDC which reports deaths for  
33 consistent age groups for 2015 through 2020.  
34  
35  
36  
37  
38  
39  
40  
41  
42  
43  
44  
45  
46  
47  
48  
49  
50  
51  
52  
53  
54  
55  
56  
57  
58  
59  
60

Annex Table A1: Age Distribution of Official COVID-19 Deaths and Excess Deaths in 2020 (Data Shown in Figure 2)

| Country                | GNI per capita (PPP) | World Bank Income Group | Share (%) of official COVID-19 deaths by age group |       |       |       |       |     | Share (%) of excess mortality deaths by age group |       |       |       |       |     |  |
|------------------------|----------------------|-------------------------|----------------------------------------------------|-------|-------|-------|-------|-----|---------------------------------------------------|-------|-------|-------|-------|-----|--|
|                        |                      |                         | 0-44                                               | 45-54 | 55-64 | 65-74 | 75-84 | 85+ | 0-44                                              | 45-54 | 55-64 | 65-74 | 75-84 | 85+ |  |
| Bangladesh             | 5,180                | LMIC                    | 21                                                 | 25    | 27    | 13    | 9     | 6   |                                                   |       |       |       |       |     |  |
| India                  | 6,930                | LMIC                    | 13                                                 | 19    | 27    | 26    | 12    | 3   |                                                   |       |       |       |       |     |  |
| Guatemala              | 8,850                | UMIC                    | 14                                                 | 16    | 25    | 25    | 15    | 5   |                                                   |       |       |       |       |     |  |
| Philippines            | 10,220               | LMIC                    | 13                                                 | 14    | 24    | 28    | 16    | 6   |                                                   |       |       |       |       |     |  |
| Indonesia              | 11,940               | LMIC                    | 22                                                 | 22    | 28    | 15    | 9     | 4   |                                                   |       |       |       |       |     |  |
| Paraguay               | 12,760               | UMIC                    | 8                                                  | 9     | 22    | 27    | 23    | 11  |                                                   |       |       |       |       |     |  |
| Peru                   | 12,820               | UMIC                    | 8                                                  | 11    | 22    | 27    | 21    | 11  | 5                                                 | 10    | 20    | 26    | 23    | 15  |  |
| Ukraine                | 13,510               | LMIC                    | 4                                                  | 8     | 23    | 33    | 26    | 6   |                                                   |       |       |       |       |     |  |
| Moldova                | 14,280               | LMIC                    | 3                                                  | 8     | 26    | 38    | 20    | 5   |                                                   |       |       |       |       |     |  |
| Georgia                | 14,930               | UMIC                    | 2                                                  | 6     | 19    | 33    | 30    | 10  |                                                   |       |       |       |       |     |  |
| Brazil*                | 14,980               | UMIC                    | 7                                                  | 8     | 16    | 24    | 29    | 17  | 4                                                 | 10    | 15    | 23    | 26    | 22  |  |
| Colombia               | 15,320               | UMIC                    | 6                                                  | 8     | 18    | 26    | 26    | 16  | 2                                                 | 9     | 19    | 29    | 27    | 15  |  |
| Bosnia and Herzegovina | 15,700               | UMIC                    | 2                                                  | 5     | 16    | 32    | 32    | 13  |                                                   |       |       |       |       |     |  |
| North Macedonia        | 16,740               | UMIC                    | 4                                                  | 9     | 22    | 34    | 26    | 6   |                                                   |       |       |       |       |     |  |
| Serbia                 | 17,810               | UMIC                    | 2                                                  | 5     | 15    | 35    | 30    | 12  |                                                   |       |       |       |       |     |  |
| Mexico                 | 19,290               | UMIC                    | 10                                                 | 16    | 26    | 27    | 17    | 5   | 5                                                 | 15    | 25    | 28    | 20    | 8   |  |
| Argentina              | 22,090               | UMIC                    | 4                                                  | 6     | 14    | 25    | 28    | 25  |                                                   |       |       |       |       |     |  |
| Bulgaria               | 23,810               | UMIC                    | 3                                                  | 6     | 18    | 35    | 29    | 9   | 1                                                 | 6     | 14    | 30    | 33    | 15  |  |
| Kazakhstan             | 24,040               | UMIC                    | 5                                                  | 9     | 25    | 34    | 22    | 6   |                                                   |       |       |       |       |     |  |
| Chile                  | 24,480               | HIC                     | 4                                                  | 6     | 16    | 25    | 29    | 21  | 2                                                 | 8     | 18    | 27    | 32    | 14  |  |
| Turkey                 | 26,410               | UMIC                    | 3                                                  | 7     | 17    | 30    | 28    | 15  |                                                   |       |       |       |       |     |  |
| Greece                 | 30,080               | HIC                     | 2                                                  | 5     | 9     | 15    | 25    | 45  | 1                                                 | 2     | 6     | 18    | 43    | 31  |  |
| Slovakia               | 31,410               | HIC                     | 1                                                  | 3     | 11    | 28    | 36    | 22  | 0                                                 | 3     | 6     | 24    | 48    | 19  |  |
| Hungary                | 32,630               | HIC                     | 2                                                  | 4     | 11    | 25    | 34    | 25  | 1                                                 | 7     | 3     | 32    | 40    | 17  |  |
| Portugal               | 35,230               | HIC                     | 1                                                  | 2     | 5     | 14    | 30    | 50  | 1                                                 | 3     | 4     | 12    | 37    | 42  |  |

1  
2  
3  
4  
5  
6  
7  
8  
9  
10  
11  
12  
13  
14  
15  
16  
17  
18  
19  
20  
21  
22  
23  
24  
25  
26  
27  
28  
29  
30  
31  
32  
33  
34  
35  
36  
37  
38  
39  
40  
41  
42  
43  
44  
45  
46  
47  
48  
49  
50  
51  
52  
53  
54  
55  
56  
57  
58  
59  
60

|                   |        |     |   |   |    |    |    |    |   |    |    |    |    |    |
|-------------------|--------|-----|---|---|----|----|----|----|---|----|----|----|----|----|
| Lithuania         | 37,200 | HIC | 1 | 4 | 13 | 20 | 36 | 27 | 3 | 11 | 17 | 25 | 26 | 17 |
| Israel*           | 39,780 | HIC | 2 | 3 | 8  | 21 | 28 | 39 | 0 | 1  | 3  | 10 | 32 | 54 |
| Scotland          | 40,000 | HIC | 1 | 2 | 7  | 17 | 34 | 40 | 0 | 4  | 8  | 19 | 30 | 38 |
| Slovenia          | 40,060 | HIC | 1 | 1 | 3  | 12 | 33 | 50 | 0 | 5  | 0  | 13 | 35 | 48 |
| Czech Republic    | 40,260 | HIC | 1 | 2 | 6  | 23 | 38 | 31 | 0 | 2  | 6  | 17 | 46 | 29 |
| Spain             | 41,790 | HIC | 1 | 2 | 6  | 14 | 28 | 49 | 1 | 2  | 5  | 11 | 34 | 47 |
| Japan             | 44,260 | HIC | 1 | 2 | 5  | 16 | 35 | 42 |   |    |    |    |    |    |
| Italy             | 44,720 | HIC | 1 | 2 | 6  | 16 | 35 | 41 | 0 | 1  | 5  | 17 | 33 | 43 |
| England and Wales | 47,880 | HIC | 1 | 3 | 7  | 15 | 33 | 42 |   |    |    |    |    |    |
| Canada            | 48,670 | HIC | 1 | 1 | 4  | 12 | 25 | 57 |   |    |    |    |    |    |
| France            | 50,130 | HIC | 1 | 2 | 6  | 17 | 30 | 44 | 0 | 1  | 4  | 12 | 35 | 48 |
| Belgium           | 54,790 | HIC | 1 | 1 | 5  | 12 | 15 | 67 | 0 | 2  | 5  | 11 | 36 | 47 |
| Sweden            | 56,190 | HIC | 1 | 1 | 4  | 12 | 32 | 50 | 0 | 1  | 6  | 5  | 43 | 45 |
| Germany           | 57,460 | HIC | 1 | 1 | 5  | 12 | 34 | 47 | 2 | 0  | 4  | 27 | 0  | 67 |
| Austria           | 57,870 | HIC | 1 | 1 | 5  | 13 | 34 | 47 | 2 | 0  | 8  | 17 | 42 | 31 |
| Netherlands       | 59,250 | HIC | 0 | 1 | 4  | 15 | 37 | 44 | 1 | 3  | 2  | 14 | 43 | 37 |
| USA               | 66,120 | HIC | 3 | 5 | 12 | 21 | 28 | 32 | 7 | 7  | 12 | 21 | 25 | 27 |
| Switzerland       | 69,440 | HIC | 0 | 1 | 3  | 12 | 29 | 55 | 1 | 1  | 2  | 7  | 29 | 60 |

\* The age groups available to compute excess deaths for Brazil differ from those used in other countries and correspond to the following: 0-39, 40-49, 50-59, 60-69, 70-79, 80+. GNI is from 2019.

Annex Table A2: Hypothetical Age Distribution of Official COVID-19 and Excess Deaths in 2020, Using Country Age-Specific Mortality Rates and the US Population Age Distribution (Data Shown in Figure 3)

| Country                | GNI per capita (PPP) | World Bank Income Group | Share (%) of official COVID-19 deaths by age group |       |       |       |       |     | Share (%) of excess mortality deaths by age group |       |       |       |       |     |  |
|------------------------|----------------------|-------------------------|----------------------------------------------------|-------|-------|-------|-------|-----|---------------------------------------------------|-------|-------|-------|-------|-----|--|
|                        |                      |                         | 0-44                                               | 45-54 | 55-64 | 65-74 | 75-84 | 85+ | 0-44                                              | 45-54 | 55-64 | 65-74 | 75-84 | 85+ |  |
| Bangladesh             | 5,180                | LMIC                    | 21                                                 | 25    | 27    | 13    | 9     | 6   |                                                   |       |       |       |       |     |  |
| India                  | 6,930                | LMIC                    | 13                                                 | 19    | 27    | 26    | 12    | 3   |                                                   |       |       |       |       |     |  |
| Guatemala              | 8,850                | UMIC                    | 14                                                 | 16    | 25    | 25    | 15    | 5   |                                                   |       |       |       |       |     |  |
| Philippines            | 10,220               | LMIC                    | 13                                                 | 14    | 24    | 28    | 16    | 6   |                                                   |       |       |       |       |     |  |
| Indonesia              | 11,940               | LMIC                    | 22                                                 | 22    | 28    | 15    | 9     | 4   |                                                   |       |       |       |       |     |  |
| Paraguay               | 12,760               | UMIC                    | 8                                                  | 9     | 22    | 27    | 23    | 11  |                                                   |       |       |       |       |     |  |
| Peru                   | 12,820               | UMIC                    | 8                                                  | 11    | 22    | 27    | 21    | 11  | 5                                                 | 10    | 20    | 26    | 23    | 15  |  |
| Ukraine                | 13,510               | LMIC                    | 4                                                  | 8     | 23    | 33    | 26    | 6   |                                                   |       |       |       |       |     |  |
| Moldova                | 14,280               | LMIC                    | 3                                                  | 8     | 26    | 38    | 20    | 5   |                                                   |       |       |       |       |     |  |
| Georgia                | 14,930               | UMIC                    | 2                                                  | 6     | 19    | 33    | 30    | 10  |                                                   |       |       |       |       |     |  |
| Brazil*                | 14,980               | UMIC                    | 7                                                  | 8     | 16    | 24    | 29    | 17  | 4                                                 | 10    | 15    | 23    | 26    | 22  |  |
| Colombia               | 15,320               | UMIC                    | 6                                                  | 8     | 18    | 26    | 26    | 16  | 2                                                 | 9     | 19    | 29    | 27    | 15  |  |
| Bosnia and Herzegovina | 15,700               | UMIC                    | 2                                                  | 5     | 16    | 32    | 32    | 13  |                                                   |       |       |       |       |     |  |
| North Macedonia        | 16,740               | UMIC                    | 4                                                  | 9     | 22    | 34    | 26    | 6   |                                                   |       |       |       |       |     |  |
| Serbia                 | 17,810               | UMIC                    | 2                                                  | 5     | 15    | 35    | 30    | 12  |                                                   |       |       |       |       |     |  |
| Mexico                 | 19,290               | UMIC                    | 10                                                 | 16    | 26    | 27    | 17    | 5   | 5                                                 | 15    | 25    | 28    | 20    | 8   |  |
| Argentina              | 22,090               | UMIC                    | 4                                                  | 6     | 14    | 25    | 28    | 25  |                                                   |       |       |       |       |     |  |
| Bulgaria               | 23,810               | UMIC                    | 3                                                  | 6     | 18    | 35    | 29    | 9   | 1                                                 | 6     | 14    | 30    | 33    | 15  |  |
| Kazakhstan             | 24,040               | UMIC                    | 5                                                  | 9     | 25    | 34    | 22    | 6   |                                                   |       |       |       |       |     |  |
| Chile                  | 24,480               | HIC                     | 4                                                  | 6     | 16    | 25    | 29    | 21  | 2                                                 | 8     | 18    | 27    | 32    | 14  |  |
| Turkey                 | 26,410               | UMIC                    | 3                                                  | 7     | 17    | 30    | 28    | 15  |                                                   |       |       |       |       |     |  |
| Greece                 | 30,080               | HIC                     | 2                                                  | 5     | 9     | 15    | 25    | 45  | 1                                                 | 2     | 6     | 18    | 43    | 31  |  |
| Slovakia               | 31,410               | HIC                     | 1                                                  | 3     | 11    | 28    | 36    | 22  | 0                                                 | 3     | 6     | 24    | 48    | 19  |  |

1  
2  
3  
4  
5  
6  
7  
8  
9  
10  
11  
12  
13  
14  
15  
16  
17  
18  
19  
20  
21  
22  
23  
24  
25  
26  
27  
28  
29  
30  
31  
32  
33  
34  
35  
36  
37  
38  
39  
40  
41  
42  
43  
44  
45  
46  
47  
48  
49  
50  
51  
52  
53  
54  
55  
56  
57  
58  
59  
60

|                   |        |     |   |   |    |    |    |    |   |    |    |    |    |    |
|-------------------|--------|-----|---|---|----|----|----|----|---|----|----|----|----|----|
| Hungary           | 32,630 | HIC | 2 | 4 | 11 | 25 | 34 | 25 | 1 | 7  | 3  | 32 | 40 | 17 |
| Portugal          | 35,230 | HIC | 1 | 2 | 5  | 14 | 30 | 50 | 1 | 3  | 4  | 12 | 37 | 42 |
| Lithuania         | 37,200 | HIC | 1 | 4 | 13 | 20 | 36 | 27 | 3 | 11 | 17 | 25 | 26 | 17 |
| Israel*           | 39,780 | HIC | 2 | 3 | 8  | 21 | 28 | 39 | 0 | 1  | 3  | 10 | 32 | 54 |
| Scotland          | 40,000 | HIC | 1 | 2 | 7  | 17 | 34 | 40 | 0 | 4  | 8  | 19 | 30 | 38 |
| Slovenia          | 40,060 | HIC | 1 | 1 | 3  | 12 | 33 | 50 | 0 | 5  | 0  | 13 | 35 | 48 |
| Czech Republic    | 40,260 | HIC | 1 | 2 | 6  | 23 | 38 | 31 | 0 | 2  | 6  | 17 | 46 | 29 |
| Spain             | 41,790 | HIC | 1 | 2 | 6  | 14 | 28 | 49 | 1 | 2  | 5  | 11 | 34 | 47 |
| Japan             | 44,260 | HIC | 1 | 2 | 5  | 16 | 35 | 42 |   |    |    |    |    |    |
| Italy             | 44,720 | HIC | 1 | 2 | 6  | 16 | 35 | 41 | 0 | 1  | 5  | 17 | 33 | 43 |
| England and Wales | 47,880 | HIC | 1 | 3 | 7  | 15 | 33 | 42 |   |    |    |    |    |    |
| Canada            | 48,670 | HIC | 1 | 1 | 4  | 12 | 25 | 57 |   |    |    |    |    |    |
| France            | 50,130 | HIC | 1 | 2 | 6  | 17 | 30 | 44 | 0 | 1  | 4  | 12 | 35 | 48 |
| Belgium           | 54,790 | HIC | 1 | 1 | 5  | 12 | 15 | 67 | 0 | 2  | 5  | 11 | 36 | 47 |
| Sweden            | 56,190 | HIC | 1 | 1 | 4  | 12 | 32 | 50 | 0 | 1  | 6  | 5  | 43 | 45 |
| Germany           | 57,460 | HIC | 1 | 1 | 5  | 12 | 34 | 47 | 2 | 0  | 4  | 27 | 0  | 67 |
| Austria           | 57,870 | HIC | 1 | 1 | 5  | 13 | 34 | 47 | 2 | 0  | 8  | 17 | 42 | 31 |
| Netherlands       | 59,250 | HIC | 0 | 1 | 4  | 15 | 37 | 44 | 1 | 3  | 2  | 14 | 43 | 37 |
| USA               | 66,120 | HIC | 3 | 5 | 12 | 21 | 28 | 32 | 7 | 7  | 12 | 21 | 25 | 27 |
| Switzerland       | 69,440 | HIC | 0 | 1 | 3  | 12 | 29 | 55 | 1 | 1  | 2  | 7  | 29 | 60 |

\* The age groups available to compute excess deaths for Brazil differ from those used in other countries and correspond to the following: 0-39, 40-49, 50-59, 60-69, 70-79, 80+. GNI is from 2019.

Annex Table A3: Rate of Increase in Risk of Death by Age and Ratio of Mortality Risk Between Age Groups

| Country                | Official deaths                                                    |                            | Excess deaths                                                      |                            |
|------------------------|--------------------------------------------------------------------|----------------------------|--------------------------------------------------------------------|----------------------------|
|                        | Exponential rate of increase in risk of death for each year of age | Ratio (MR 75-84/ MR 45-54) | Exponential rate of increase in risk of death for each year of age | Ratio (MR 75-84/ MR 45-54) |
| Afghanistan            | 0.06                                                               | 5.74                       |                                                                    |                            |
| Albania                | 0.06                                                               | 5.88                       |                                                                    |                            |
| Algeria                | 0.08                                                               | 10.72                      |                                                                    |                            |
| Argentina              | 0.08                                                               | 14.89                      |                                                                    |                            |
| Australia              | 0.16                                                               | 103.71                     |                                                                    |                            |
| Austria                | 0.13                                                               | 50.11                      | 0.10                                                               | 195.28                     |
| Bangladesh             | 0.04                                                               | 2.39                       |                                                                    |                            |
| Belgium                | 0.15                                                               | 28.08                      | 0.13                                                               | 52.81                      |
| Bosnia and Herzegovina | 0.08                                                               | 15.22                      |                                                                    |                            |
| Brazil                 | 0.07                                                               | 16.70                      |                                                                    |                            |
| Bulgaria               | 0.06                                                               | 9.59                       | 0.07                                                               | 11.48                      |
| Cameroon               | 0.07                                                               | 7.73                       |                                                                    |                            |
| Cada                   | 0.15                                                               | 52.78                      |                                                                    |                            |
| Chad                   | 0.07                                                               | 5.58                       |                                                                    |                            |
| Chile                  | 0.08                                                               | 17.96                      | 0.07                                                               | 14.85                      |
| Colombia               | 0.07                                                               | 14.63                      | 0.08                                                               | 14.24                      |
| Costa Rica             | 0.05                                                               | 7.67                       |                                                                    |                            |
| Croatia                |                                                                    |                            | 0.10                                                               | 22.54                      |
| Czech Republic         | 0.11                                                               | 61.17                      | 0.12                                                               | 64.18                      |
| Denmark                | 0.13                                                               | 78.46                      | 0.02                                                               | -2.31                      |
| El Salvador            | 0.05                                                               | 1.62                       |                                                                    |                            |
| England and Wales      | 0.11                                                               | 27.90                      |                                                                    |                            |
| Estonia                |                                                                    |                            | 0.02                                                               | -2.26                      |
| Eswatini               | 0.06                                                               | 4.26                       |                                                                    |                            |
| Finland                | 0.12                                                               | 26.90                      | 0.05                                                               | 5.10                       |
| France                 | 0.10                                                               | 34.25                      | 0.12                                                               | 87.28                      |
| Georgia                | 0.07                                                               | 14.21                      |                                                                    |                            |
| Germany                | 0.12                                                               | 44.66                      | 0.13                                                               | -164.35                    |
| Greece                 | 0.09                                                               | 11.09                      | 0.09                                                               | 41.67                      |
| Guatemala              | 0.05                                                               | 4.66                       |                                                                    |                            |
| Haiti                  | 0.05                                                               | 5.29                       |                                                                    |                            |
| Hong Kong SAR, China   | 0.12                                                               |                            |                                                                    |                            |
| Hungary                | 0.09                                                               | 21.90                      | 0.08                                                               | 14.44                      |
| Iceland                |                                                                    |                            | 0.03                                                               | 12.27                      |
| India                  | 0.05                                                               | 4.03                       |                                                                    |                            |

|    |                      |      |       |      |       |
|----|----------------------|------|-------|------|-------|
| 1  |                      |      |       |      |       |
| 2  |                      |      |       |      |       |
| 3  | Indonesia            | 0.04 | 3.02  |      |       |
| 4  | Israel               | 0.10 | 32.91 |      |       |
| 5  | Italy                | 0.10 | 39.76 | 0.11 | 46.03 |
| 6  | Jamaica              | 0.06 | 9.42  |      |       |
| 7  | Japan                | 0.10 | 29.85 |      |       |
| 8  | Kazakhstan           | 0.07 | 12.00 |      |       |
| 9  | Latvia               | 0.07 | 12.95 | 0.06 | 4.29  |
| 10 | Lithuania            | 0.08 | 18.85 | 0.05 | 4.42  |
| 11 | Luxembourg           |      |       | 0.12 | -7.52 |
| 12 | Malawi               | 0.06 | 2.93  |      |       |
| 13 | Mauritius            | 0.03 | 4.19  |      |       |
| 14 | Mexico               | 0.05 | 5.53  | 0.06 | 7.13  |
| 15 | Moldova              | 0.06 | 9.75  |      |       |
| 16 | Nepal                | 0.05 | 7.62  |      |       |
| 17 | Netherlands          | 0.13 | 72.86 | 0.12 | 29.32 |
| 18 | New Zealand          | 0.11 | 28.02 |      |       |
| 19 | Nicaragua            | 0.06 | 8.32  |      |       |
| 20 | Nigeria              | 0.06 | 6.32  |      |       |
| 21 | North Macedonia      | 0.06 | 9.73  |      |       |
| 22 | Northern Ireland     | 0.12 | 37.00 | 0.10 | 74.72 |
| 23 | Norway               | 0.12 | 32.03 | 0.06 | 11.47 |
| 24 | Oman                 | 0.07 | 18.21 |      |       |
| 25 | Paraguay             | 0.07 | 10.69 |      |       |
| 26 | Peru                 | 0.06 | 8.17  | 0.07 | 10.09 |
| 27 | Philippines          | 0.06 | 7.94  |      |       |
| 28 | Poland               |      |       | 0.10 | 17.50 |
| 29 | Portugal             | 0.12 | 39.63 | 0.11 | 24.73 |
| 30 | Qatar                | 0.10 | 52.10 |      |       |
| 31 | Scotland             | 0.11 | 34.29 | 0.11 | 16.75 |
| 32 | Serbia               | 0.07 | 14.42 |      |       |
| 33 | Sierra Leone         | 0.06 | 8.29  |      |       |
| 34 | Slovakia             | 0.09 | 36.46 | 0.11 | 48.40 |
| 35 | Slovenia             | 0.14 | 78.16 | 0.13 | 16.23 |
| 36 | Somalia              | 0.14 | 56.77 |      |       |
| 37 | South Korea          | 0.13 | 78.62 |      |       |
| 38 | Spain                | 0.11 | 36.59 | 0.11 | 54.12 |
| 39 | Sweden               | 0.13 | 47.08 | 0.13 | 79.55 |
| 40 | Switzerland          | 0.15 | 96.99 | 0.15 | 51.80 |
| 41 | Taiwan               |      |       | 0.04 | 13.73 |
| 42 | Togo                 | 0.05 | 3.22  |      |       |
| 43 | Turkey               | 0.08 | 18.27 |      |       |
| 44 | Ukraine              | 0.05 | 8.09  |      |       |
| 45 | United Arab Emirates | 0.11 | 26.72 |      |       |
| 46 | Uruguay              | 0.08 | 23.17 |      |       |
| 47 | USA                  | 0.08 | 14.50 | 0.06 | 9.07  |
| 48 | Vietnam              | 0.05 | 8.74  |      |       |



1  
2  
3  
4  
5  
6  
7  
8  
9  
10  
11  
12  
13  
14  
15  
16  
17  
18  
19  
20  
21  
22  
23  
24  
25  
26  
27  
28  
29  
30  
31  
32  
33  
34  
35  
36  
37  
38  
39  
40  
41  
42  
43  
44  
45  
46  
47  
48  
49  
50  
51  
52  
53  
54  
55  
56  
57  
58  
59  
60

For peer review only

1  
2  
3  
4  
5  
6  
7  
8  
9  
10  
11  
12  
13  
14  
15  
16  
17  
18  
19  
20  
21  
22  
23  
24  
25  
26  
27  
28  
29  
30  
31  
32  
33  
34  
35  
36  
37  
38  
39  
40  
41  
42  
43  
44  
45  
46  
47  
48  
49  
50  
51  
52  
53  
54  
55  
56  
57  
58  
59  
60

## STROBE Statement—checklist of items that should be included in reports of observational studies

|                              | Item No | Recommendation                                                                                                                                                                                                                                                                                                                                                                                                                                                                                                                                                                                                                                                                                               |
|------------------------------|---------|--------------------------------------------------------------------------------------------------------------------------------------------------------------------------------------------------------------------------------------------------------------------------------------------------------------------------------------------------------------------------------------------------------------------------------------------------------------------------------------------------------------------------------------------------------------------------------------------------------------------------------------------------------------------------------------------------------------|
| <b>Title and abstract</b>    | 1       | (a) Indicate the study's design with a commonly used term in the title or the abstract<br><b>Yes, in title</b><br>(b) Provide in the abstract an informative and balanced summary of what was done and what was found. <b>Yes, in abstract</b>                                                                                                                                                                                                                                                                                                                                                                                                                                                               |
| <b>Introduction</b>          |         |                                                                                                                                                                                                                                                                                                                                                                                                                                                                                                                                                                                                                                                                                                              |
| Background/rationale         | 2       | Explain the scientific background and rationale for the investigation being reported. <b>P. 3</b>                                                                                                                                                                                                                                                                                                                                                                                                                                                                                                                                                                                                            |
| Objectives                   | 3       | State specific objectives, including any prespecified hypotheses. <b>P. 3</b>                                                                                                                                                                                                                                                                                                                                                                                                                                                                                                                                                                                                                                |
| <b>Methods</b>               |         |                                                                                                                                                                                                                                                                                                                                                                                                                                                                                                                                                                                                                                                                                                              |
| Study design                 | 4       | Present key elements of study design early in the paper. <b>P 3-4</b>                                                                                                                                                                                                                                                                                                                                                                                                                                                                                                                                                                                                                                        |
| Setting                      | 5       | Describe the setting, locations, and relevant dates, including periods of recruitment, exposure, follow-up, and data collection <b>P. 4</b>                                                                                                                                                                                                                                                                                                                                                                                                                                                                                                                                                                  |
| Participants                 | 6       | (a) <i>Cohort study</i> —Give the eligibility criteria, and the sources and methods of selection of participants. Describe methods of follow-up<br><i>Case-control study</i> —Give the eligibility criteria, and the sources and methods of case ascertainment and control selection. Give the rationale for the choice of cases and controls<br><i>Cross-sectional study</i> —Give the eligibility criteria, and the sources and methods of selection of participants <b>P. 4</b><br>(b) <i>Cohort study</i> —For matched studies, give matching criteria and number of exposed and unexposed<br><i>Case-control study</i> —For matched studies, give matching criteria and the number of controls per case |
| Variables                    | 7       | Clearly define all outcomes, exposures, predictors, potential confounders, and effect modifiers. Give diagnostic criteria, if applicable <b>P 4-5</b> .                                                                                                                                                                                                                                                                                                                                                                                                                                                                                                                                                      |
| Data sources/<br>measurement | 8*      | For each variable of interest, give sources of data and details of methods of assessment (measurement). Describe comparability of assessment methods if there is more than one group <b>P. 4</b>                                                                                                                                                                                                                                                                                                                                                                                                                                                                                                             |
| Bias                         | 9       | Describe any efforts to address potential sources of bias <b>P. 4-5</b>                                                                                                                                                                                                                                                                                                                                                                                                                                                                                                                                                                                                                                      |
| Study size                   | 10      | Explain how the study size was arrived at <b>P 4</b> .                                                                                                                                                                                                                                                                                                                                                                                                                                                                                                                                                                                                                                                       |
| Quantitative variables       | 11      | Explain how quantitative variables were handled in the analyses. If applicable, describe which groupings were chosen and why <b>P. 4-6</b>                                                                                                                                                                                                                                                                                                                                                                                                                                                                                                                                                                   |
| Statistical methods          | 12      | (a) Describe all statistical methods, including those used to control for confounding <b>P. 4-6</b><br>(b) Describe any methods used to examine subgroups and interactions <b>P. 4-6</b><br>(c) Explain how missing data were addressed<br>(d) <i>Cohort study</i> —If applicable, explain how loss to follow-up was addressed<br><i>Case-control study</i> —If applicable, explain how matching of cases and controls was addressed<br><i>Cross-sectional study</i> —If applicable, describe analytical methods taking account of sampling strategy <b>P. 6</b><br>(e) Describe any sensitivity analyses. <b>Figure 3, Figure 7, P. 7 and 9.</b>                                                            |

Continued on next page

**Results**

|                  |     |                                                                                                                                                                                                                                                                                                                                                                                                                                 |
|------------------|-----|---------------------------------------------------------------------------------------------------------------------------------------------------------------------------------------------------------------------------------------------------------------------------------------------------------------------------------------------------------------------------------------------------------------------------------|
| Participants     | 13* | (a) Report numbers of individuals at each stage of study—eg numbers potentially eligible, examined for eligibility, confirmed eligible, included in the study, completing follow-up, and analysed. <b>Not applicable as the unit of analysis is the country.</b><br>(b) Give reasons for non-participation at each stage<br>(c) Consider use of a flow diagram                                                                  |
| Descriptive data | 14* | (a) Give characteristics of study participants (eg demographic, clinical, social) and information on exposures and potential confounders. <b>Countries are classified by income level.</b><br>(b) Indicate number of participants with missing data for each variable of interest<br>(c) <i>Cohort study</i> —Summarise follow-up time (eg, average and total amount) N.A.                                                      |
| Outcome data     | 15* | <i>Cohort study</i> —Report numbers of outcome events or summary measures over time<br><i>Case-control study</i> —Report numbers in each exposure category, or summary measures of exposure<br><i>Cross-sectional study</i> —Report numbers of outcome events or summary measures <b>P. 6-9.</b>                                                                                                                                |
| Main results     | 16  | (a) Give unadjusted estimates and, if applicable, confounder-adjusted estimates and their precision (eg, 95% confidence interval). Make clear which confounders were adjusted for and why they were included. Figures 2 and 3.<br>(b) Report category boundaries when continuous variables were categorized<br>(c) If relevant, consider translating estimates of relative risk into absolute risk for a meaningful time period |
| Other analyses   | 17  | Report other analyses done—eg analyses of subgroups and interactions, and sensitivity analyses <b>Figure 3, Figure 7, P. 7 and 9.</b>                                                                                                                                                                                                                                                                                           |

**Discussion**

|                  |    |                                                                                                                                                                                            |
|------------------|----|--------------------------------------------------------------------------------------------------------------------------------------------------------------------------------------------|
| Key results      | 18 | Summarise key results with reference to study objectives <b>P. 9-10</b>                                                                                                                    |
| Limitations      | 19 | Discuss limitations of the study, taking into account sources of potential bias or imprecision. Discuss both direction and magnitude of any potential bias <b>P. 10</b>                    |
| Interpretation   | 20 | Give a cautious overall interpretation of results considering objectives, limitations, multiplicity of analyses, results from similar studies, and other relevant evidence <b>P. 10-12</b> |
| Generalisability | 21 | Discuss the generalisability (external validity) of the study results <b>P. 10</b>                                                                                                         |

**Other information**

|         |    |                                                                                                                                                                                             |
|---------|----|---------------------------------------------------------------------------------------------------------------------------------------------------------------------------------------------|
| Funding | 22 | Give the source of funding and the role of the funders for the present study and, if applicable, for the original study on which the present article is based. <b>No funding to report.</b> |
|---------|----|---------------------------------------------------------------------------------------------------------------------------------------------------------------------------------------------|

\*Give information separately for cases and controls in case-control studies and, if applicable, for exposed and unexposed groups in cohort and cross-sectional studies.

**Note:** An Explanation and Elaboration article discusses each checklist item and gives methodological background and published examples of transparent reporting. The STROBE checklist is best used in conjunction with this article (freely available on the Web sites of PLoS Medicine at <http://www.plosmedicine.org/>, Annals of Internal Medicine at <http://www.annals.org/>, and Epidemiology at <http://www.epidem.com/>). Information on the STROBE Initiative is available at [www.strobe-statement.org](http://www.strobe-statement.org).

# BMJ Open

**Are COVID-19 age-mortality curves for 2020 flatter in developing countries?  
Evidence from a cross-sectional observational study of population-level official death counts and excess deaths estimates.**

|                                 |                                                                                                                                                                                                                                                                                                                                                        |
|---------------------------------|--------------------------------------------------------------------------------------------------------------------------------------------------------------------------------------------------------------------------------------------------------------------------------------------------------------------------------------------------------|
| Journal:                        | <i>BMJ Open</i>                                                                                                                                                                                                                                                                                                                                        |
| Manuscript ID                   | bmjopen-2022-061589.R2                                                                                                                                                                                                                                                                                                                                 |
| Article Type:                   | Original research                                                                                                                                                                                                                                                                                                                                      |
| Date Submitted by the Author:   | 29-Aug-2022                                                                                                                                                                                                                                                                                                                                            |
| Complete List of Authors:       | Demombynes, Gabriel; World Bank, Human Development Global Practice de Walque, Damien; World Bank, Development Research Group Gubbins, Paul; World Bank, Human Development Global Practice Urdinola, Piedad ; Universidad Nacional de Colombia - Sede Bogotá, School of Economics Veillard, Jeremy; World Bank Group, Human Development Global Practice |
| <b>Primary Subject Heading</b>: | Infectious diseases                                                                                                                                                                                                                                                                                                                                    |
| Secondary Subject Heading:      | Epidemiology                                                                                                                                                                                                                                                                                                                                           |
| Keywords:                       | COVID-19, EPIDEMIOLOGY, PUBLIC HEALTH                                                                                                                                                                                                                                                                                                                  |
|                                 |                                                                                                                                                                                                                                                                                                                                                        |

SCHOLARONE™  
Manuscripts



I, the Submitting Author has the right to grant and does grant on behalf of all authors of the Work (as defined in the below author licence), an exclusive licence and/or a non-exclusive licence for contributions from authors who are: i) UK Crown employees; ii) where BMJ has agreed a CC-BY licence shall apply, and/or iii) in accordance with the terms applicable for US Federal Government officers or employees acting as part of their official duties; on a worldwide, perpetual, irrevocable, royalty-free basis to BMJ Publishing Group Ltd ("BMJ") its licensees and where the relevant Journal is co-owned by BMJ to the co-owners of the Journal, to publish the Work in this journal and any other BMJ products and to exploit all rights, as set out in our [licence](#).

The Submitting Author accepts and understands that any supply made under these terms is made by BMJ to the Submitting Author unless you are acting as an employee on behalf of your employer or a postgraduate student of an affiliated institution which is paying any applicable article publishing charge ("APC") for Open Access articles. Where the Submitting Author wishes to make the Work available on an Open Access basis (and intends to pay the relevant APC), the terms of reuse of such Open Access shall be governed by a Creative Commons licence – details of these licences and which [Creative Commons](#) licence will apply to this Work are set out in our licence referred to above.

Other than as permitted in any relevant BMJ Author's Self Archiving Policies, I confirm this Work has not been accepted for publication elsewhere, is not being considered for publication elsewhere and does not duplicate material already published. I confirm all authors consent to publication of this Work and authorise the granting of this licence.

1  
2  
3  
4  
5 **Are COVID-19 age-mortality curves for 2020 flatter in developing countries?**  
6 **Evidence from a cross-sectional observational study of population-level official death**  
7 **counts and excess deaths estimates.**  
8

9  
10 Gabriel Demombynes<sup>1</sup>, Damien de Walque<sup>2</sup>, Paul Gubbins<sup>1</sup>,  
11  
12 B. Piedad Urdinola<sup>3</sup>, Jeremy Veillard<sup>1</sup>  
13  
14  
15  
16  
17  
18  
19  
20  
21  
22  
23  
24  
25  
26  
27  
28  
29  
30  
31  
32

33 Keywords: COVID-19, Pandemic, Developing Countries, Mortality  
34  
35  
36  
37

38 Corresponding author: Damien de Walque, The World Bank, Development Research Group, The  
39 World Bank. [ddewalque@worldbank.org](mailto:ddewalque@worldbank.org)  
40  
41  
42

43 Affiliations  
44

- 45 1. The World Bank, Human Development Global Practice
- 46 2. The World Bank, Development Research Group
- 47 3. School of Economics at Universidad Nacional de Colombia-Bogotá
- 48
- 49
- 50
- 51
- 52
- 53
- 54
- 55
- 56
- 57
- 58
- 59
- 60

## Abstract

### *Objectives*

Previous studies have found a pattern of flatter COVID-19 age-mortality curves among low- and middle-income countries using only official COVID-19 death counts. This study examines this question by comparing the age gradient of COVID-19 mortality in a broad set of countries using both official COVID-19 death counts and excess mortality estimates for 2020.

### *Design*

This observational study uses official COVID-19 death counts for 76 countries and excess death estimates for 42 countries. A standardized population analysis was conducted to assess the extent to which variation across countries in the age distribution of COVID-19 deaths was driven by variation in the population age distribution.

### *Setting and primary outcomes*

Official reported COVID-19 deaths and excess deaths for 2020 for all countries where such data was available in the COVERAGE database and the Short-Term Mortality Fluctuations (STMF) harmonized data series, respectively.

### *Results*

A higher share of pandemic-related deaths in 2020 occurred at younger ages in middle-income countries compared to high-income countries. People under age 65 constituted on average (1) 10 percent of official deaths and 11 percent of excess deaths in high-income countries, (2) 34 percent of official deaths and 33 percent of excess deaths in upper-middle-income countries, and (3) 54 percent of official deaths in lower-middle-income countries. These contrasting profiles are due only in part to differences in population age structure.

### *Conclusions*

These findings are driven by some combination of variation in age patterns of infection rates and infection fatality rates. They indicate that COVID-19 is not just a danger to older people in developing countries, where a large share of victims are people of working age, who are caregivers and breadwinners for their families.

### Strengths and limitations of this study

- This study compares the age gradient of COVID-19 mortality in a broad set of countries using both official COVID-19 death counts and excess mortality estimates for 2020.
- This represents a methodological contribution because nearly all studies of the pandemic's age mortality patterns have used only official COVID-19 death data. However, excess deaths at the aggregate population level during the pandemic exceed officially recognized COVID-19 deaths in most countries.
- Using a standardized population analysis, this study assesses the extent to which variation across countries in the age distribution of COVID-19 deaths was driven by variation in the population age distribution.
- The available data for this study does not allow ascertaining to what extent the reported differences in the age-specific mortality rates are driven by differences in age-specific cumulative infection rates or in the age-specific cumulative infection fatality rate or both.
- Because of limitations in available mortality data, the analysis includes a large set of high-and-middle income countries but does not include many low-income countries.



## Introduction

An important question for understanding the global impact of the COVID-19 pandemic is the disease's age pattern of mortality across countries. Early in the pandemic, case data from COVID-19 patients in mainland China showed that COVID-19 mortality risk increases rapidly with age.<sup>[1]</sup> This risk profile would tend to limit the death toll in developing countries, which generally have younger populations. But this prediction only holds if the age profile of COVID-19 mortality remains similar across countries.

Our study examines this question by comparing the age gradient of COVID-19 mortality in a broad set of countries using both official COVID-19 death counts and excess mortality estimates for 2020. Vaccine availability was very limited before 2021 and therefore is unlikely to affect the mortality patterns identified in this analysis.

Nearly all studies of the pandemic's age mortality patterns have used only official COVID-19 death data.<sup>[2-7]</sup> Some of these studies have found a pattern of flatter COVID-19 age-mortality curves among low- and middle-income countries (LMICs) using only official COVID-19 death counts.<sup>[4],[7]</sup> However, excess deaths at the aggregate population level during the pandemic exceed officially recognized COVID-19 deaths in most countries.<sup>[8-10]</sup> Other studies have used excess mortality estimates but have mainly focused on estimating changes to life-expectancy without examining the age profile of the COVID-19 impacts on mortality.<sup>[11-13]</sup> This is to our knowledge the first study that estimates COVID-19 excess mortality by age for a wide swath of countries.

Several studies have highlighted possible contributing factors to variation across countries in overall COVID-19 mortality, including age structure of the population and preexisting health conditions and those same factors could generate different patterns in mortality by age.<sup>[14-19]</sup> When using only official death counts, it is unclear to what extent the finding of flatter COVID-19 age-mortality curves among low- and middle-income countries (LMICs) may have been driven by data reporting issues. In particular, it is possible that deaths among older people in developing countries have been more likely to be under-attributed to the disease in official COVID-19 death counts. This paper addresses that concern and examines this question by

1  
2  
3 comparing the age gradient of COVID-19 mortality in a broad set of countries using both official  
4 COVID-19 death counts and excess mortality estimates for 2020.  
5  
6  
7  
8  
9  
10

## 11 **Methods**

### 12 *Data sources*

13 The analysis employs two main sources of data:  
14  
15

- 16 1. Official reported COVID-19 deaths drawn from the COVERAGE database, with death  
17 counts aggregated to 5-year age-groups, downloaded May 16, 2022.<sup>[20]</sup> 76 countries have  
18 a record of cumulative deaths that satisfies the inclusion criteria of covering at least 6  
19 months since the first case was detected in the country (per case-data derived from [Our](#)  
20 [World in Data](#)<sup>[21]</sup>).  
21  
22
- 23 2. All-cause deaths by age drawn from national vital statistics records, aggregated in the  
24 Short-Term Mortality Fluctuations harmonized data series assembled as part of the  
25 Human Mortality Database, downloaded February 18, 2022 (38 countries).<sup>[22], [23]</sup>  
26  
27  
28  
29  
30  
31

32 Additional all-cause death data from Colombia, Mexico, Brazil, Peru and the United States was  
33 obtained from national statistical offices.<sup>[24-27]</sup> Contrary to other COVID mortality estimates  
34 such as those released by the World Health Organization, this study does not use modelled data.  
35  
36  
37  
38  
39  
40  
41  
42  
43  
44  
45  
46  
47  
48  
49  
50  
51  
52  
53  
54  
55  
56  
57  
58  
59  
60

### *Standardized population*

A standardized population analysis was conducted to assess the extent to which variation across  
countries in the age distribution of COVID-19 deaths was driven by variation in the population  
age distribution. First age-specific mortality rates were calculated by dividing the number of  
deaths attributed to COVID-19 for each age group by the population in each age group. These  
calculations were conducted for the following age groups: under 45, 45-54, 55-64, 65-74, 75-84,  
85 and above. A hypothetical age distribution of deaths for each country was calculated by  
multiplying the age-specific COVID-19 mortality rates by corresponding population shares from

1  
2  
3 the United States. A parallel calculation was carried out using estimates of excess mortality by  
4 age.  
5

### 6 *Excess mortality calculations*

7  
8  
9 Excess mortality methods compare the number of deaths to the number of expected deaths  
10 during a period of interest. Excess mortality is often treated as the “gold standard” in analysis of  
11 COVID-19 mortality.<sup>[29]</sup> However, there are two issues that are often overlooked in the analysis  
12 of excess mortality.  
13  
14

15  
16  
17 The first issue is that estimates are sensitive to the choice of method. Many COVID-19 excess  
18 mortality calculations have estimated expected deaths as the mean number of deaths over a  
19 corresponding period in previous years. If the number of deaths was trending upward in previous  
20 years, this common approach will over-estimate excess mortality.<sup>[30], [31]</sup>  
21  
22

23  
24 This issue is illustrated in Figure 1 for five Latin American countries. All five countries show an  
25 increase in the number of annual deaths over 2015-19. Excess death estimates based on  
26 predicting expected 2020 deaths using estimated 2015-19 linear trends (red lines) are shown as  
27 “Excess 1.” Alternative excess death estimates using a prediction based on the 2015-19 mean  
28 death count (blue lines) are shown as “Excess 2.” In all cases, ignoring the increase over time  
29 and using the historical mean to calculate expected deaths would result in substantial  
30 overestimation of excess deaths.  
31  
32

33  
34  
35 For the analysis in this paper, expected deaths are estimated using a simple regression using  
36 2015-2019 historical data, run separately by country and age-group, where observed deaths are  
37 modeled as a linear function of year and an error term.  
38  
39

40  
41  
42 The second issue often neglected in COVID-19 excess mortality discussions is that excess  
43 mortality represents a combination of effects. Specifically,  
44

45  
46  
47 *Net excess deaths* =

$$48 \quad [Direct\ COVID-19\ deaths] + [Indirect\ COVID-19\ deaths] - [Averted\ deaths]$$

49  
50  
51 *Direct COVID-19 deaths* are those due to infection with the virus. *Indirect COVID-19 deaths* are  
52 those due in part to factors such as congestion in the health system, delays in care-seeking, or  
53 mental health issues caused by the pandemic. *Averted deaths* are those that would have taken  
54  
55  
56  
57

1  
2  
3 place in the absence of the pandemic but did not occur as a result of pandemic-induced measures.  
4 These could include deaths due to other infectious diseases, violence, or traffic injuries that were  
5 avoided due to voluntary or mandated social distancing. The possibility of non-zero indirect  
6 deaths and averted deaths makes the interpretation of excess deaths more complex than is often  
7 recognized.  
8  
9

### 10 11 12 *Slope calculation*

13  
14 The shape of an age-mortality curve can be summarized in terms of the percent rate of increase  
15 in the mortality rate per year of additional age after age 45, calculated by running a Poisson  
16 regression using deaths as response variable and exposures as an offset, fitting a Gompertz  
17 (1825) model to the data. [32, 33]  
18  
19

$$20 \quad D_{x,i} \sim \text{Poisson}(u_i \theta_i) \text{ where } \theta_i = \exp(\alpha_i + \beta_i X_i)$$

21  
22 where the age-specific number of deaths is  $D_{x,i}$  for the ten-year age group age  $x$  to age  $x + 9$ , ( $x$   
23 = 45, 55, 65, 75, 85) in country  $i$ . The  $x = 85$  points correspond to the group consisting of all ages  
24 85 and above. To interpret death counts relative to person-years, an exposure term  $u_i$  is  
25 introduced as an offset in the model as  $\log(u_i)$ .  
26  
27

28  
29 The coefficients,  $\beta_i$ , are the rates of increase per year of age in the mortality rate. This  
30 calculation was performed first defining  $D(x,i)$  in terms of official COVID-19 counts by age for  
31 each country for which data was available. The calculation was also performed for each country  
32 defining  $D(x,i)$  using excess mortality estimates by age as described in the previous section.<sup>1</sup>  
33  
34 These results provide 1) the slope of the COVID-19 age-mortality curve according to official  
35 counts, and 2) the slope of the age-mortality curve for excess deaths.  
36  
37  
38  
39  
40  
41  
42

### 43 **Patient and public involvement**

44  
45 The study presents analysis of secondary data. There was no patient and public involvement.  
46  
47

### 48 **Results**

49  
50 The left side of Figure 2 shows the age distribution of officially recorded COVID-19 deaths in  
51 2020 by country and the age distribution of excess deaths. According to official reports, on  
52  
53

---

54  
55 <sup>1</sup> When estimated excess deaths were zero or less, a weight of zero was assigned to such cases.  
56  
57

1  
2  
3 average across high-income countries, just 10 percent of deaths were among those under age 65.<sup>2</sup>  
4  
5 In contrast, people under 65 constituted on average 34 percent of official COVID-19 deaths in  
6  
7 upper-middle-income countries and 54 percent of deaths in lower-middle-income countries. The  
8  
9 same pattern is observed using the distribution of excess deaths by age, shown on the right side  
10  
11 of Figure 2. In high-income countries, those under 65 are 11 percent of excess deaths. For the  
12  
13 upper-middle-income countries for which data is available (Peru, Colombia, and Mexico), the  
14  
15 age profiles of excess deaths are similar to those of official COVID-19 deaths, and those under  
16  
17 age 65 account for on average 33 percent of excess deaths.<sup>3</sup>

18  
19 Figure 3 shows the hypothetical age distribution of COVID-19 deaths according to official  
20  
21 reports, as well as excess deaths, applying the United States standardized age distribution. This  
22  
23 controls for the differing population age distributions across countries. Unsurprisingly in low-  
24  
25 and middle-income countries, which have younger populations than the United States, the  
26  
27 hypothetical distribution shows an older profile of deaths as compared to the actual distribution.  
28  
29 However, the pattern of a younger profile of deaths in less wealthy countries remains, both with  
30  
31 official data and with excess mortality data. The numbers shown in Figures 2 and 3 can also be  
32  
33 found in Appendix Tables A1 and A2.

34  
35 Notably the United States has a much younger profile of death—using both official COVID-19  
36  
37 death counts and excess mortality—than countries with similar income levels. This is the case  
38  
39 even after controlling for differences in population age distribution. The age distribution of  
40  
41 deaths in the United States is roughly similar to that of Chile. In both countries, 27 percent of  
42  
43 excess deaths were among those under age 65.

44  
45 Figure 4 presents a visual representation of all the mortality rates by age group across all  
46  
47 countries and economies with available data. The vertical axis represents mortality rates per  
48  
49 100,000 on a log scale, and it is important to note that the scale varies across countries, reflecting  
50  
51 the different levels of exposure to the pandemic and to its related mortality across the globe.

---

52  
53 <sup>2</sup> Note that all countries in Figure 2 from Chile downward with the exception of Turkey on the figure are classified  
54  
55 as high-income countries. Turkey is classified as an upper-middle-income country. Bangladesh, India, the  
56  
57 Philippines, Jordan, and Indonesia are lower-middle-income countries. World Bank classifications are based on GNI  
58  
59 calculated by the Atlas method while the figure uses GNI calculated with purchasing power parity exchange rates.

60  
<sup>3</sup> Data is also available to produce excess death estimates by age for Brazil, but not with our preferred age group  
breakdown.

1  
2  
3 Overall, mortality rates increase with age, albeit with different gradients. With the excess  
4 mortality data, a few deviations from this gradient are likely due to the relatively low mortality  
5 as well as the overall small number of deaths (e.g., Iceland). Australia, New Zealand and  
6 Taiwan, China have close to zero official COVID-19 deaths and show negative estimates of  
7 excess mortality rates, especially for the older age groups, likely reflecting averted deaths due to  
8 isolation policies.  
9

10  
11  
12  
13  
14 Figure 5 shows a more detailed comparison of results for five Latin American countries and the  
15 United States, using the same log scale for all countries. To add perspective on the extent of  
16 COVID-19 related mortality compared to what might have been the mortality experience in the  
17 absence of the COVID-19 pandemic, each figure adds in grey the expected all-cause mortality  
18 for 2020, based on levels and trends in the 5 preceding years. For each country, the figure also  
19 reports the total cumulative deaths for 2020 using both official COVID-19 deaths and excess  
20 mortality.  
21  
22  
23  
24  
25

26  
27 Official COVID-19 death counts are higher than excess-mortality estimates in some cases. These  
28 patterns indicate that for these country-age group combinations, the number of deaths averted  
29 due to the pandemic exceeds indirect COVID-19 deaths. This could have occurred, for example,  
30 because a decline in driving and exposure to violence during lockdowns and a reduction in  
31 transmission of other infectious diseases as a result of pandemic precautions. Similar to our  
32 estimates, dos Santo et al (2021) <sup>[34]</sup> find for Brazil that total estimated excess mortality in 2020  
33 was below the official COVID-19 death count, reflecting drops in deaths due to violence as well  
34 as cardiovascular and infectious diseases.  
35  
36  
37  
38  
39  
40

41  
42 In Mexico, the mortality estimates using excess deaths is consistently higher than using the  
43 official COVID-19 death count, and the gap between both measures increases with age. In the  
44 United States, mortality estimates using excess deaths are also higher than using official COVID-  
45 19 deaths, but that difference decreases with age and becomes minimal for older age groups. The  
46 especially extreme impact of the pandemic in Peru is evident in Figure 5. Among those ages 45-  
47 74, both deaths attributed to COVID-19 and excess deaths exceeded total expected all-cause  
48 mortality for 2020.  
49  
50  
51  
52  
53

54  
55 Another notable pattern evident in Figure 5 is the large gap between the two measures for the  
56 United States at younger age groups. For the 15-44 age group, the excess death estimate is four  
57

1  
2  
3 times the official COVID-19 death count. Given that testing of patients with COVID-19  
4 symptoms has been widespread in the United States in all but the early stages of the pandemic,  
5 the jump in excess mortality among young people most likely reflects indirect COVID-19 deaths.  
6  
7

8  
9 Figure 6 explores how the slope of the age-mortality gradient for each country varies with its  
10 level of income. More precisely, it shows the exponential rate of increase in mortality by age in  
11 percent per year against 2019 GNI per capita (the numbers for the estimated rates of increase are  
12 available in Appendix Table A3). The right panel presents this plot for the 76 countries with  
13 official COVID-19 deaths data and the right displays the corresponding plot for the 34 countries  
14 with excess deaths estimates available for a consistent set of age-groups as follows: 45-54, 55-  
15 64, 65-74, 75-84, 85+. Using all available data, we find that the increase in mortality risk with  
16 each additional year of age typically ranges (IQR) from 6.3 to 11.7 percent (median = 9.8) using  
17 excess deaths and 5.9 to 11.1 percent (median = 7.6) using official deaths.  
18  
19  
20  
21  
22  
23  
24

25 Both plots show a positive association between income per capita and the age-mortality gradient,  
26 indicating that COVID-19 mortality increases more steeply for older age groups in richer  
27 countries. Using official death rate data, across countries the rate of increase of mortality risk per  
28 year of age rises by 0.11 percent for each US\$1,000 of GNI. Using excess mortality data, it rises  
29 by 0.03 percent for each US\$1,000 of GNI.  
30  
31  
32  
33

34 To verify that this observed association is not driven by the composition of both sets of  
35 countries/economies, Figure 7 repeats the same exercise with the common set of 28  
36 countries/economies. The conclusions taken from Figures 6 and 7 are similar: COVID mortality  
37 is more concentrated among older individuals in richer countries. Using official death rate data,  
38 across countries the rate of increase of mortality risk per year of age rises by 0.13 percent for  
39 each US\$1,000 of GNI. Using excess mortality data, it rises by 0.05 percent for each US\$1,000  
40 of GNI.  
41  
42  
43  
44  
45  
46  
47

## 48 **Discussion**

49  
50 The age profile of COVID-19 mortality risk in 2020 was flatter (with relatively higher mortality  
51 at younger ages) in countries with lower incomes. This pattern is found using official COVID-19  
52 death data from a large set of countries as well as excess mortality from a smaller set of countries  
53 which include high-income countries plus Colombia, Mexico, and Peru. Our analysis concerns  
54  
55  
56  
57



1  
2  
3 the year 2020 and is therefore unaffected by the arrival of COVID-19 vaccines and their unequal  
4 distribution across countries.  
5

6  
7 One limitation of this study is that the available data does not allow ascertaining to what extent  
8 the reported differences in the age-specific mortality rates are driven by differences in age-  
9 specific cumulative infection rates or in the age-specific cumulative infection fatality rate or  
10 both. Further, because of limitations in available mortality data, the analysis includes a large set  
11 of high-and-middle income countries but does not include many low-income countries. Finally,  
12 we acknowledge that, even as we used excess mortality measures to address the concern of  
13 under-reporting of official COVID-19 deaths, all causes mortality itself could also be  
14 underreported in some countries and that the extent of underreporting might vary across  
15 countries. This would however affect our analysis only to the extent that the underreporting of all  
16 causes mortality was affected by the COVID pandemic.  
17  
18  
19  
20  
21  
22  
23  
24

25 The findings in this paper can provide the basis for a more comprehensive accounting of the  
26 impact of COVID-19. For example, the younger mortality profile in developing countries means  
27 that in those countries the pandemic has killed large numbers of people who were of working  
28 age, many of whom were their families' breadwinners. Earlier global estimates suggest that more  
29 than 1.5 million children have experienced the death of at least one caregiver as a consequence  
30 of the pandemic.<sup>[35]</sup> This raises the concern that long-term impacts via lower investments in  
31 human capital of orphaned children will be particularly deep in developing countries. This is  
32 highly worrisome given the already massive declines in school enrollment and learning losses  
33 generated by the pandemic in developing countries.<sup>[36-38]</sup>  
34  
35  
36  
37  
38  
39  
40

41 A full understanding of age-specific patterns of excess mortality will require country-by-country  
42 analysis using cause-of-death data, where available, to pull apart estimates of direct COVID-19  
43 deaths, indirect COVID-19 deaths, and averted deaths. A brief comparison of Colombia and the  
44 United States highlights how components of excess mortality can vary widely by country. In  
45 Colombia, both vehicular and homicide deaths fell during the country's lockdown, reducing its  
46 excess mortality count. For 2020 vehicular deaths dropped 18.2 percent, and the number of  
47 homicides fell 5.4 percent, causing Colombia's murder rate to reach its lowest level since  
48 1979.<sup>[39,40]</sup> In contrast, the United States excess mortality estimate for 2020 reflects in part a 7.2  
49  
50  
51  
52  
53  
54  
55  
56  
57  
58  
59  
60



percent increase in motor vehicle deaths, a 29.4 percent increase in homicides, and a 30.0 percent spike in drug overdose deaths.<sup>[41–43]</sup>

Official COVID-19 death reports and excess mortality estimates show broadly similar age patterns country-by-country. This finding, along with the fact that direct COVID-19 deaths account for the large share of excess mortality, suggests that the flatter profile of excess mortality in lower income countries is driven principally by direct COVID-19 deaths. To consider drivers of the direct COVID-19 age pattern it is useful to note that the age-specific mortality rate is the product of the age-specific cumulative infection rate (*IR*) and the age-specific cumulative infection fatality rate (*IFR*). Using a notation where  $N(x,i)$  is the population of the age group in country  $i$ ,  $D(x,i)$  is the number of deaths in the age group, and  $I(x,i)$  designates the cumulative number of infections of age group  $x$  in country  $i$ , this can be expressed as follows:

$$\begin{aligned} r(x,i) &= \frac{D(x,i)}{N(x,i)} = \frac{I(x,i)}{N(x,i)} * \frac{D(x,i)}{I(x,i)} \\ &= IR(x,i) * IFR(x,i) \end{aligned}$$

The greater flatness of direct COVID-19 age-specific mortality rates in lower income countries could result from differing patterns across countries by age of *IR*, *IFR*, or both. A number of studies have documented possible contributing factors to variation across countries in overall COVID-19 mortality and those same factors could generate different patterns in mortality by age.<sup>[14–18]</sup>

The relative *IR* of younger vs. older people may vary across countries for many reasons. First, in lower income countries, a large share of the population cannot work remotely.<sup>[44]</sup> Second, in developing countries, a lower share of older people are long-term care facility residents, who are at high risk for infection and death. One-quarter of recognized COVID-19 deaths during the first few months of the pandemic in the United Kingdom were residents of care facilities, and 31 percent of recognized COVID-19 deaths in the United States as of June 1, 2021 were care facility residents or staff.<sup>[45,46]</sup> Both of these characteristics of developing countries would tend to increase the relative risk of infection for younger people. On the other hand, in low- and middle-income countries, intergenerational households are more common. This means older people are more exposed to infection risk, particularly because in those countries people are more likely to live in crowded conditions. Roughly 20 percent of households in LMICs have at least one

1  
2  
3 household member under age 20 and one over age 60, as compared to just 5 percent in high-  
4 income countries.<sup>[47]</sup> In 54 LMICs with recent Demographic and Health Surveys, just half of the  
5 households have no more than two people per sleeping room.<sup>[17]</sup>  
6  
7

8  
9 Among those infected, age-specific IFRs may vary by age due to many different factors. One  
10 systematic review found that age-specific IFRs in developing countries were roughly 2 times  
11 higher than in high-income countries.<sup>[48]</sup> Country-level factors like the profile of comorbidities,  
12 differences in health system capacity, quality of care, infection prevention and control practices,  
13 and availability of personal protective equipment, could have age-specific effects on the  
14 IFR.<sup>[18,49]</sup> A form of survivor bias may be a factor as well. High quality medical care in wealthier  
15 countries keeps many older people alive despite weak health conditions that make them  
16 vulnerable to COVID-19. It may be that older people in developing countries are on average  
17 healthier than those in wealthier countries because those with ailments would have been at high  
18 risk for death at younger ages. If this is the case, older people in developing countries might be  
19 more resilient to the disease.  
20  
21  
22  
23  
24  
25  
26  
27

28  
29 Distinguishing various explanations for the observed age patterns of mortality identified in this  
30 paper should be a topic for further research. The analysis in this paper is also a reminder of the  
31 value of demographic data and in particular vital statistics as a tool amid the COVID-19 crisis.  
32 Excess mortality analysis by age presented here is only possible for countries that have well-  
33 functioning vital statistics systems and that have made their data widely available. Investments in  
34 vital statistics systems and greater data transparency should be encouraged as a global public  
35 good.  
36  
37  
38  
39  
40  
41  
42  
43  
44  
45  
46  
47  
48  
49  
50  
51  
52  
53  
54  
55  
56  
57  
58  
59  
60

## Acknowledgments

The authors express appreciation to Joshua Goldstein, Young Eun Kim, Ronald D. Lee, Norman Loayza, Andrew Noymer, Robert Oelrichs, Sharon Piza, and Philip Schellekens for helpful suggestions. The findings, interpretations, and conclusions in this paper are entirely those of the authors. They do not necessarily represent the views of the International Bank for Reconstruction and Development/World Bank and its affiliated organizations, or those of the Executive Directors of the World Bank or the governments they represent and are not intended to make any judgment on the legal or other status of geographic areas, or to prejudice the determination of any claims with respect to such area.

## Funding

None

## Author information

Affiliations

### *The World Bank, Human Development Global Practice*

Gabriel Demombynes ([gdemombynes@worldbank.org](mailto:gdemombynes@worldbank.org)), Paul Gubbins ([paul.gubbins@gmail.com](mailto:paul.gubbins@gmail.com)),  
Jeremy Veillard ([jveillard@worldbank.org](mailto:jveillard@worldbank.org))

### *The World Bank, Development Research Group*

Damien de Walque ([ddewalque@worldbank.org](mailto:ddewalque@worldbank.org))

### *School of Economics at Universidad Nacional de Colombia-Bogotá*

B. Piedad Urdinola ([bpurdinolac@unal.edu.co](mailto:bpurdinolac@unal.edu.co))

## Data availability statement

The data availability section in the online appendix describes the data sources used for this study. Upon acceptance a link to Github repository will be made available to facilitate replication.

## Author Contributions

The study and the methodology were conceived by GD, DdW, PG, BPU and JV. GD and PG conducted the formal analysis and validated the results. GD, DdW, PG, BPU and JV collaborated on writing the paper.

## Ethics Declaration

Ethics approval was not sought as the study presents results of an analysis of secondary data and does not involve human participants.

## Competing interests

The authors declare no competing interests.

1  
2  
3  
4  
5  
6  
7  
8  
9  
10  
11  
12  
13  
14  
15  
16  
17  
18  
19  
20  
21  
22  
23  
24  
25  
26  
27  
28  
29  
30  
31  
32  
33  
34  
35  
36  
37  
38  
39  
40  
41  
42  
43  
44  
45  
46  
47  
48  
49  
50  
51  
52  
53  
54  
55  
56  
57  
58  
59  
60

For peer review only

## References

1. Verity, R. *et al.* Estimates of the severity of coronavirus disease 2019: a model-based analysis. *Lancet Infect. Dis.* 2020: **20**, 669–677.
2. Sasson, I. Age and COVID-19 mortality: A comparison of Gompertz doubling time across countries and causes of death. *Demogr. Res.* 2021: **44**, 379–396.
3. Demombynes, G. COVID-19 Age-Mortality Curves Are Flatter in Developing Countries. World Bank Policy Research Working Paper. 2020. 9313.
4. Shapiro, V. COVID-19 Outbreaks and Age Mortality Patterns. 2020.
5. Goldstein, J. R. & Lee, R. D. Demographic perspectives on the mortality of COVID-19 and other epidemics. *Proc. Natl. Acad. Sci.* 2020: **117**, 22035–22041.
6. Sudharsanan, N., Didzun, O., Bärnighausen, T. & Geldsetzer, P. The Contribution of the Age Distribution of Cases to COVID-19 Case Fatality Across Countries: A Nine-Country Demographic Study. *Ann. Intern. Med.* 2020:**173**, 714–720.
7. Chauvin, J. P., Folwer, A. & Herrera, L. N. The Younger Age Profile of Covid-19 Deaths in Developing Countries. 2020. *Washington DC*.
8. Karlinsky, A. & Kobak, D. Tracking excess mortality across countries during the COVID-19 pandemic with the World Mortality Dataset. *Elife* 2021:**10**, e69336.
9. World Health Organization. Global excess deaths associated with COVID-19 (modelled estimates). May 5, 2022 Update. <https://www.who.int/data/sets/global-excess-deaths-associated-with-covid-19-modelled-estimates>
10. Knutson, V., Aleshin-Guendel, S., Karlinsky, A., Msemburi, W. and Wakefield, J., 2022. Estimating Global and Country-Specific Excess Mortality During the COVID-19 Pandemic. *arXiv preprint arXiv:2205.09081*.

- 1  
2  
3 11. Aburto, J.M., Jonas Schöley, Ilya Kashnitsky, Luyin Zhang, Charles Rahal, Trifon I Missov,  
4  
5 Melinda C Mills, Jennifer B Dowd, Ridhi Kashyap, Quantifying impacts of the COVID-19  
6  
7 pandemic through life-expectancy losses: a population-level study of 29  
8  
9 countries, *International Journal of Epidemiology*, 2021,  
10  
11
- 12 12. Islam N, Jdanov D A, Shkolnikov V M, Khunti K, Kawachi I, White M et al. Effects of  
13  
14 covid-19 pandemic on life expectancy and premature mortality in 2020: time series analysis in  
15  
16 37 countries *BMJ* 2021: 375:e066768  
17  
18
- 19 13. Castro, M.C., Gurzenda, S., Turra, C.M. *et al.* Reduction in life expectancy in Brazil after  
20  
21 COVID-19. *Nat Med* 2021: **27**, 1629–1635.  
22  
23
- 24 14. Schellekens, I. G. and P. COVID-19 is a developing country pandemic. *Brookings*  
25  
26 [https://www.brookings.edu/blog/future-development/2021/05/27/covid-19-is-a-developing-](https://www.brookings.edu/blog/future-development/2021/05/27/covid-19-is-a-developing-country-pandemic/)  
27  
28 [country-pandemic/](https://www.brookings.edu/blog/future-development/2021/05/27/covid-19-is-a-developing-country-pandemic/) (2021).  
29  
30
- 31 15. Schellekens, P. & Sourrouille, D. M. COVID-19 Mortality in Rich and Poor Countries: A  
32  
33 Tale of Two Pandemics? World Bank Policy Research Working Paper 2020: 9260.  
34  
35
- 36 16. Walker, P. G. *et al.* The impact of COVID-19 and strategies for mitigation and  
37  
38 suppression in low-and middle-income countries. *Science* 2020: 369, 413–422 2020.  
39  
40
- 41 17. Brown, C. S., Ravallion, M. & van de Walle, D. *Can the World's Poor Protect*  
42  
43 *Themselves from the New Coronavirus?* 2020.  
44  
45
- 46 18. Ghisolfi, S. *et al.* Predicted COVID-19 fatality rates based on age, sex, comorbidities and  
47  
48 health system capacity. *BMJ Glob. Health* 2020: **5**, e003094.  
49  
50
- 51 19. Ashton M Verdery, PhD, Lauren Newmyer, MA, Brandon Wagner, PhD, Rachel Margolis,  
52  
53 PhD, National Profiles of Coronavirus Disease 2019 Mortality Risks by Age Structure and  
54  
55  
56  
57  
58  
59  
60

Preexisting Health Conditions, *The Gerontologist*, Volume 61, Issue 1, February 2021, Pages 71–77, <https://doi.org/10.1093/geront/gnaa152>

[dataset] 20. Riffe, T., Acosta, E., & the COVERAGE-DB team. Data Resource Profile:

COVERAGE-DB: a global demographic database of COVID-19 cases and deaths. *Int. J. Epidemiol.* 2021: **50**, 390–390f. <https://doi.org/10.1093/ije/dyab027>

21. Hannah Ritchie, Edouard Mathieu, Lucas Rodés-Guirao, Cameron Appel, Charlie Giattino, Esteban Ortiz-Ospina, Joe Hasell, Bobbie Macdonald, Diana Beltekian and Max Roser (2020) - "Coronavirus Pandemic (COVID-19)". *Published online at OurWorldInData.org*. Retrieved from: '<https://ourworldindata.org/coronavirus>' [Online Resource]

22. Jdanov, D. A. *et al.* The short-term mortality fluctuation data series, monitoring mortality shocks across time and space. *Sci. Data* 2021: **8**, 235.

[dataset] 23. Human Mortality Database. University of California, Berkeley (USA), and Max Planck Institute for Demographic Research (Germany). Available at [www.mortality.org](http://www.mortality.org) or [www.humanmortality.de](http://www.humanmortality.de) (data downloaded on February 18, 2022).

[dataset] 24. DANE. 2022. Defunciones No Fetales. Dirección Nacional de Estadística, Bogotá, Colombia. <https://www.dane.gov.co/index.php/estadisticas-por-tema/salud/nacimientos-y-defunciones/defunciones-no-fetales> (data downloaded on February 18, 2022).

[dataset] 25. INEGI. 2022. Defunciones Registrada mortalidad general. Instituto Nacional de Estadística, Geografía e Informática (INEGI), Aguascalientes, Mexico. <https://www.inegi.org.mx/programas/mortalidad/#Microdatos> (data downloaded on February 18, 2022).

[dataset] 26. SINADef. 2022. Certificado Defunciones. Sistema Informato de Defunciones. Lima, Peru: <https://www.datosabiertos.gob.pe/dataset/sinadef-certificado->

1  
2  
3 [defunciones/resource/fef60d30-c135-4b51-82e1-a642ef29fe79](https://defunciones/resource/fef60d30-c135-4b51-82e1-a642ef29fe79) (data downloaded on February  
4  
5 18, 2022).

6  
7  
8 [dataset] 27. Ministério da Saúde. 2022. Mortalidade – Brasil. Ministério da Saúde, Brasília,  
9  
10 Brazil. <http://tabnet.datasus.gov.br/cgi/deftohtm.exe?sim/cnv/obt10uf.def> (data downloaded on  
11  
12 February 18, 2022).

13  
14  
15  
16  
17 28. DESA, U. World Population Prospects 2019. United Nations. Department of Economic  
18  
19 and Social Affairs. 2019. *World Popul. Prospects 2019*.

20  
21  
22 29. Beaney, T. *et al.* Excess mortality: the gold standard in measuring the impact of COVID-  
23  
24 19 worldwide? *J. R. Soc. Med.* 2020: **113**, 329–334.

25  
26  
27 30. Nepomuceno, M.R., Klimkin, I., Jdanov, D.A., Alustiza-Galarza, A. and Shkolnikov, V.M.  
28  
29 (2022). Sensitivity Analysis of Excess Mortality due to the COVID-19 Pandemic. *Population*  
30  
31 and Development Review. <https://doi.org/10.1111/padr.12475>

32  
33  
34 31. Schöley, J. (2021). Robustness and bias of European excess death estimates in 2020 under  
35  
36 varying model specifications. *MedRxiv*. <https://doi.org/10.1101/2021.06.04.21258353>

37  
38 32. Brillinger, D. R. (1986). A biometrics invited paper with discussion: The natural variability  
39  
40 of vital rates and associated statistics. *Biometrics*, 42(4):693–734.

41  
42  
43 33. Gompertz, B. (1825). On the nature of the function expressive of the law of human mortality,  
44  
45 and on a new mode of determining the value of life contingencies. *Philosophical Transactions*  
46  
47 of the Royal Society of London, 115:513–583.

48  
49  
50 34. Santos, A. M. dos, Souza, B. F. de, Carvalho, C. A. de, Campos, M. A. G., Oliveira, B. L. C.  
51  
52 A. de, Diniz, E. M., Branco, M. dos R. F. C. ., Queiroz, R. C. de S. ., Carvalho, V. A. de,  
53  
54 Araújo, W. R. M., & Silva, A. A. M. da. (2021). Excess deaths from all causes and by



COVID-19 in Brazil in 2020. *Revista De Saúde Pública*, 55, 71.

<https://doi.org/10.11606/s1518-8787.2021055004137>

35. Hillis, S. D. *et al.* Global minimum estimates of children affected by COVID-19-associated orphanhood and deaths of caregivers: a modelling study. *The Lancet* 2021: **398**, 391–402.
36. Bundervoet, T., Dávalos, M. E. & Garcia, N. *The Short-Term Impacts of COVID-19 on Households in Developing Countries: An Overview Based on a Harmonized Data Set of High-Frequency Surveys*. The World Bank, 2021. doi:10.1596/1813-9450-9582.
37. Miguel, E. & Mobarak, A. M. The Economics of the COVID-19 Pandemic in Poor Countries. *Annu. Rev. Econ.* 2021 doi:<https://doi.org/10.1146/annurev-economics-051520-025412>.
38. Azevedo, J. P., Hasan, A., Goldemberg, D., Geven, K. & Iqbal, S. A. Simulating the potential impacts of COVID-19 school closures on schooling and learning outcomes: A set of global estimates. *World Bank Res. Obs.* 2021: **36**, 1–40.
39. Departamento Administrativo Nacional de Estadística. Cuadros unificados: Defunciones no fatales cifras definitivas 2019. 2020.
40. Departamento Administrativo Nacional de Estadística. Cuadros unificados: Defunciones no fatales acumulado año 2020pr. 2021.
41. National Center for Statistics and Analysis. Early Estimate of Motor Vehicle Traffic Fatalities in 2020. 2021.
42. Krishnakumar, P. Murders rose sharply in 2020 but data is lacking across much of the country. 2021.
43. National Center for Health Statistics. Provisional Drug Overdose Death Counts. 2021.

- 1  
2  
3 44. Garrote Sanchez, D. *et al.* Who on earth can work from home? 2020.  
4  
5 45. Public Health England. *Disparities in the risk and outcomes of COVID-19*. 2020.  
6  
7 46. The New York Times, Nearly One-Third of U.S. Coronavirus Deaths Are Linked to  
8  
9 Nursing Homes. *The New York Times*. 2020.  
10  
11 47. Winskill, P. *et al.* *Report 22: Equity in response to the COVID-19 pandemic: an*  
12  
13 *assessment of the direct and indirect impacts on disadvantaged and vulnerable populations in*  
14  
15 *low-and lower middle-income countries WHO Collaborating Centre for Infectious Disease*  
16  
17 *Modelling MRC Centre for Global Infectious Disease Analysis*. 2020.  
18  
19 48. Levin AT, Owusu-Boaitey N, Pugh S, *et al.* Assessing the burden of COVID-19 in  
20  
21 developing countries: systematic review, meta-analysis and public policy implications *BMJ*  
22  
23 *Global Health* 2022;**7**:e008477.  
24  
25 49. Nepomuceno, M. R. *et al.* Besides population age structure, health and other  
26  
27 demographic factors can contribute to understanding the COVID-19 burden. 2020. *Proc. Natl.*  
28  
29 *Acad. Sci.* **117**, 13881–13883.  
30  
31  
32  
33  
34  
35  
36  
37  
38  
39  
40  
41  
42  
43  
44  
45  
46  
47  
48  
49  
50  
51  
52  
53  
54  
55  
56  
57  
58  
59  
60

### Figures Legend/Caption

Figure 1: Actual and predicted total deaths (all causes) by year, select countries in LAC

Figure 2: Age distribution of official COVID-19 deaths and excess deaths in 2020

Figure 3: Hypothetical age distribution of official COVID-19 and excess deaths in 2020, using country age-specific mortality rates and the US population age distribution

Figure 4: Official COVID-19 vs excess deaths by age group (per 100,000 population) [log scale]

Figure 5: Official COVID-19 vs excess deaths by age group, select Latin American countries and the United States (per 100,000 population)

Figure 6: Slope of the age-mortality curve vs GNI per capita, official COVID-19 deaths vs excess deaths, all data Poisson model (estimates use all age group and deaths recoded to 0 where they are negative)

Figure 7: Slope of the age-mortality curve vs GNI per capita, official COVID-19 deaths vs excess deaths common set of countries/economies. Poisson model (estimates use all age group and deaths recoded to 0 where they are negative)

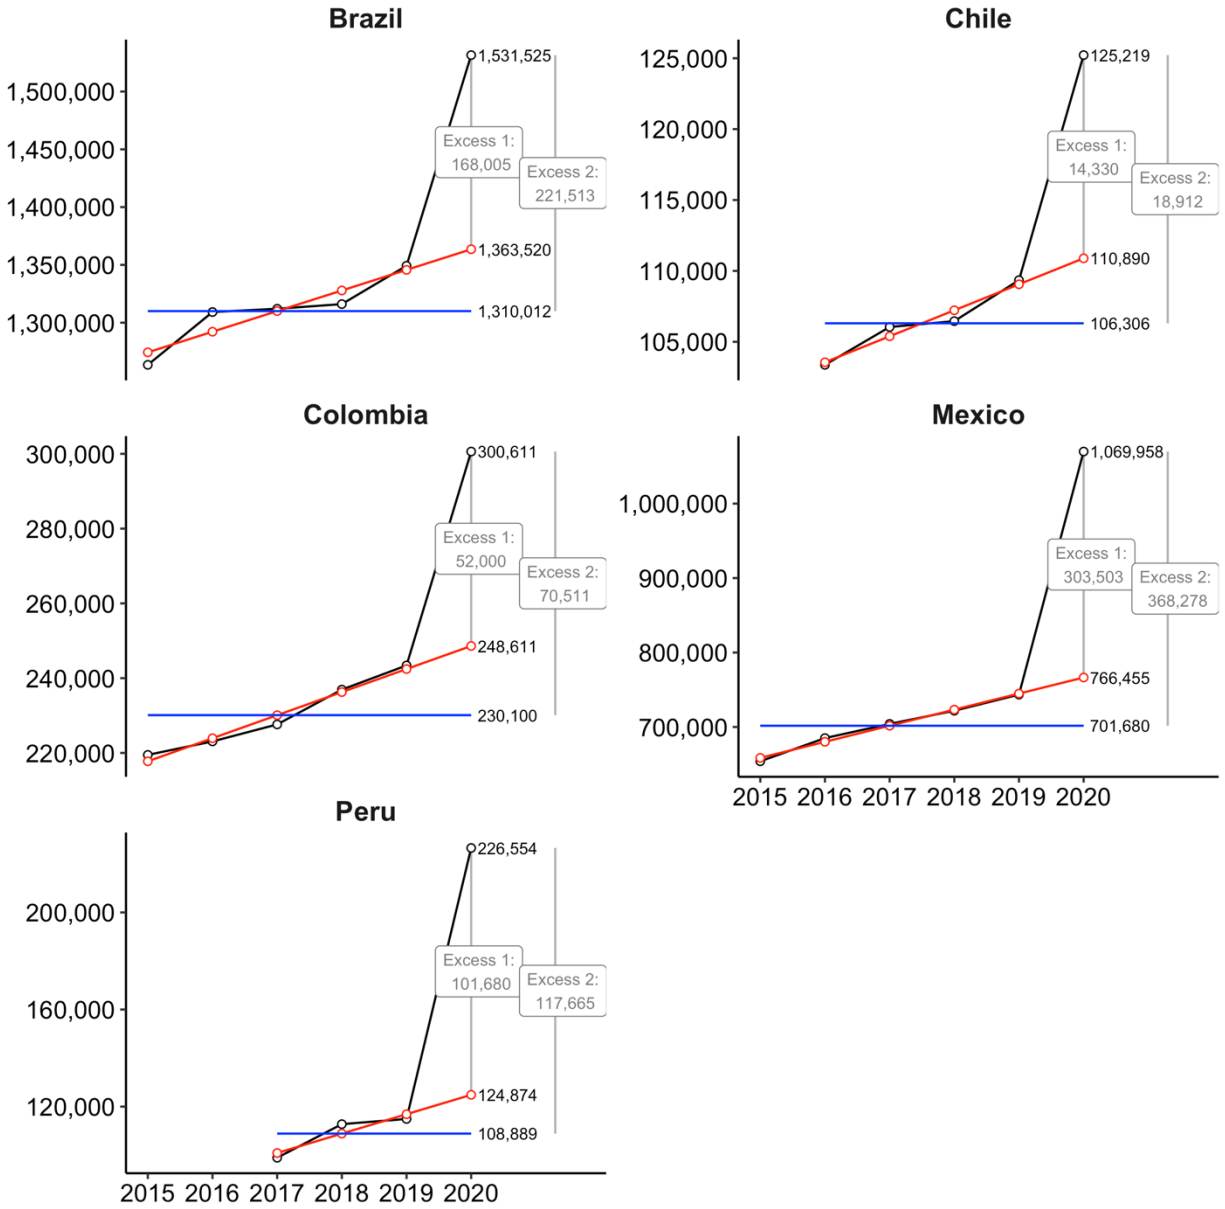

Notes: Actual deaths are shown in black. Predicted deaths based on a linear projection using annual mortality totals 2015-19 are shown in red. Mean deaths 2015-19 are shown in blue.

Figure 1: Actual and predicted total deaths (all causes) by year, select countries in LAC

1  
2  
3  
4  
5  
6  
7  
8  
9  
10  
11  
12  
13  
14  
15  
16  
17  
18  
19  
20  
21  
22  
23  
24  
25  
26  
27  
28  
29  
30  
31  
32  
33  
34  
35  
36  
37  
38  
39  
40  
41  
42  
43  
44  
45  
46  
47  
48  
49  
50  
51  
52  
53  
54  
55  
56  
57  
58  
59  
60



1  
2  
3 Notes: Countries with fewer than 2000 official COVID-19 deaths are excluded. The age-groups available to  
4 compute excess deaths for Brazil and Israel differ from those available in other countries. For Brazil and Israel,  
5 the age groups are: 0-39, 40-49, 50-59, 60-69, 70-79, 80+. Negative excess deaths estimated in the Philippines  
6 (age-groups 0-44 75-84 and 85+), Slovenia (55-64) and Scotland (0-44) are re-coded to zero. Countries are sorted  
7 by 2019 GNI per capita (PPP).  
8

9 Figure 2: Age distribution of official COVID-19 deaths and excess deaths in 2020  
10  
11  
12  
13  
14  
15  
16  
17  
18  
19  
20  
21  
22  
23  
24  
25  
26  
27  
28  
29  
30  
31  
32  
33  
34  
35  
36  
37  
38  
39  
40  
41  
42  
43  
44  
45  
46  
47  
48  
49  
50  
51  
52  
53  
54  
55  
56  
57  
58  
59  
60

1  
2  
3  
4  
5  
6  
7  
8  
9  
10  
11  
12  
13  
14  
15  
16  
17  
18  
19  
20  
21  
22  
23  
24  
25  
26  
27  
28  
29  
30  
31  
32  
33  
34  
35  
36  
37  
38  
39  
40  
41  
42  
43  
44  
45  
46  
47  
48  
49  
50  
51  
52  
53  
54  
55  
56  
57  
58  
59  
60

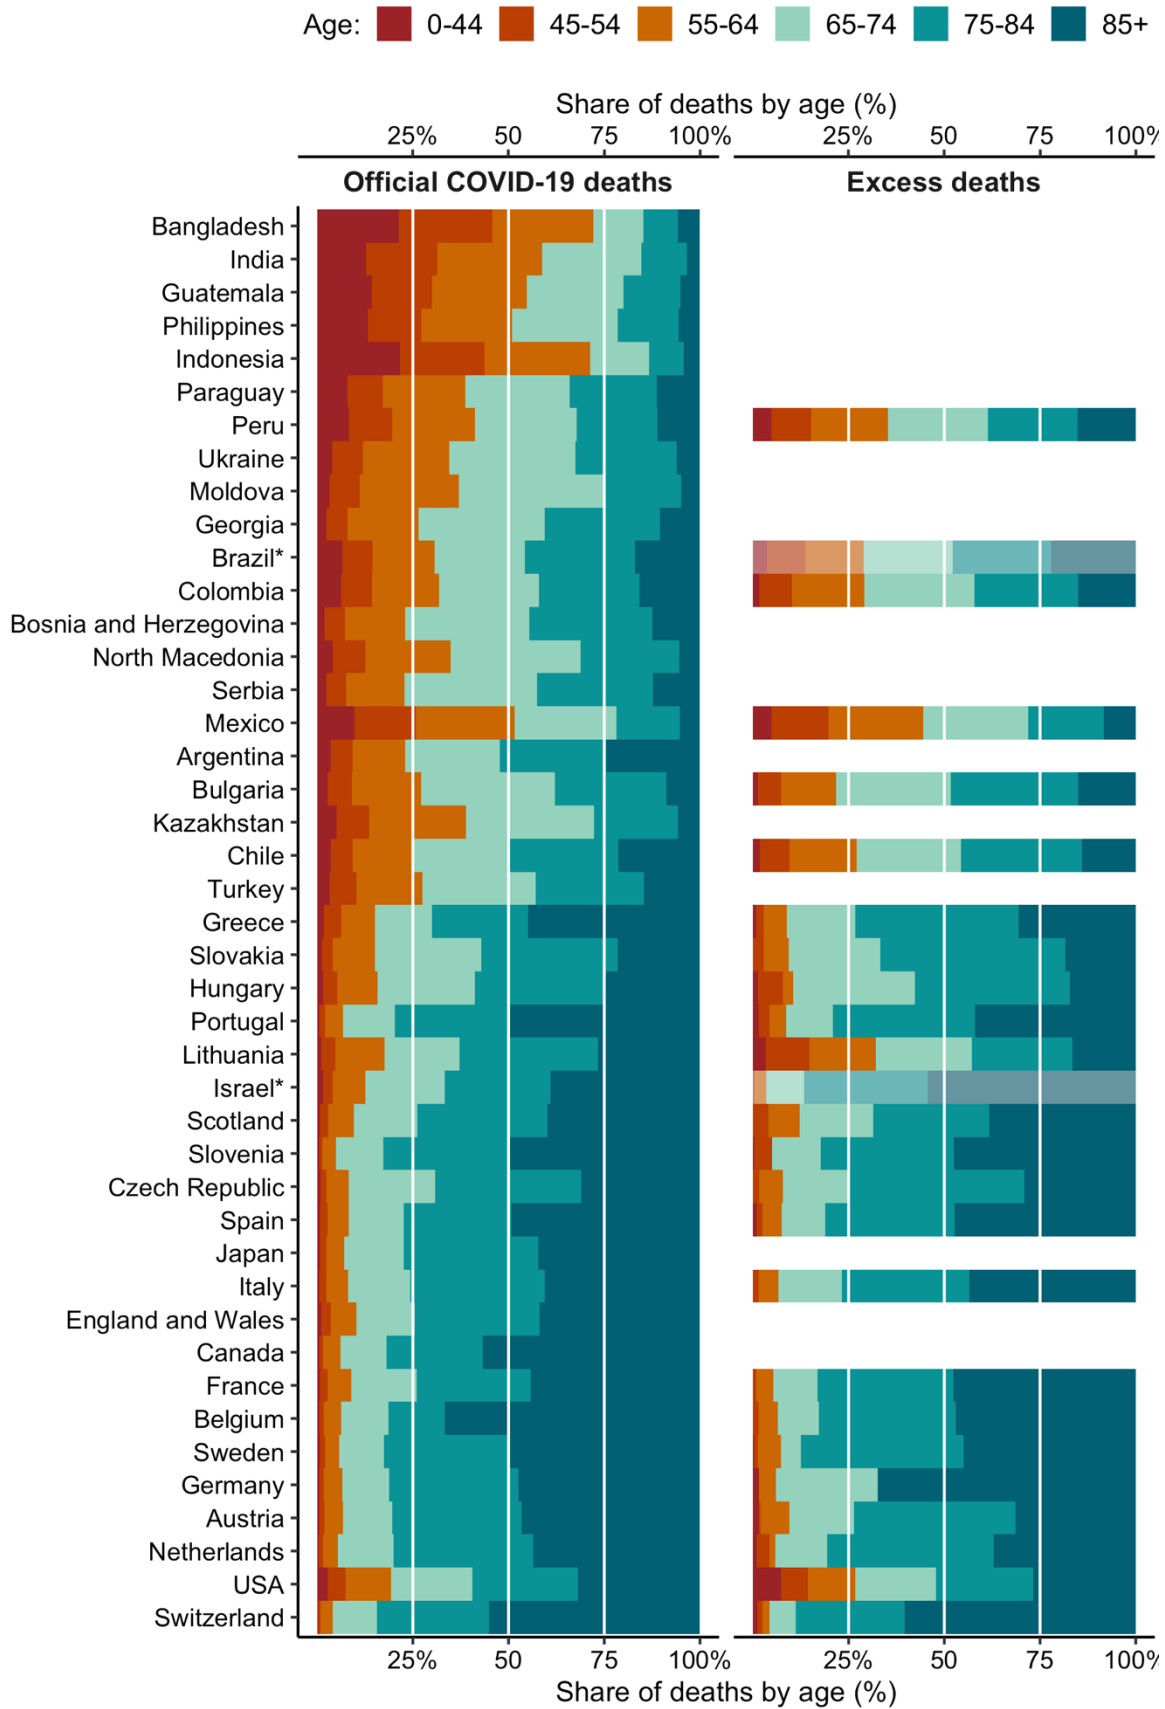

1  
2  
3 Notes: Countries with fewer than 2000 official COVID-19 deaths are excluded. The age-groups available to  
4 compute excess deaths for Brazil and Israel differ from those available in other countries. For Brazil and Israel,  
5 the age groups are: 0-39, 40-49, 50-59, 60-69, 70-79, 80+; Negative excess deaths estimated in the Philippines  
6 (age-groups 0-44 75-84 and 85+), Slovenia (55-64) and Scotland (0-44) are re-coded to zero. Countries are sorted  
7 by 2019 GNI per capita (PPP).  
8

9 Figure 3: Hypothetical age distribution of official COVID-19 and excess deaths in 2020,  
10 using country age-specific mortality rates and the US population age distribution  
11  
12  
13  
14  
15  
16  
17  
18  
19  
20  
21  
22  
23  
24  
25  
26  
27  
28  
29  
30  
31  
32  
33  
34  
35  
36  
37  
38  
39  
40  
41  
42  
43  
44  
45  
46  
47  
48  
49  
50  
51  
52  
53  
54  
55  
56  
57  
58  
59  
60



1  
2  
3  
4  
5  
6  
7  
8  
9  
10  
11  
12  
13  
14  
15  
16  
17  
18  
19  
20  
21  
22  
23  
24  
25  
26  
27  
28  
29  
30  
31  
32  
33  
34  
35  
36  
37  
38  
39  
40  
41  
42  
43  
44  
45  
46  
47  
48  
49  
50  
51  
52  
53  
54  
55  
56  
57  
58  
59  
60

Source of death data: ○ Official COVID-19 deaths ○ Excess deaths

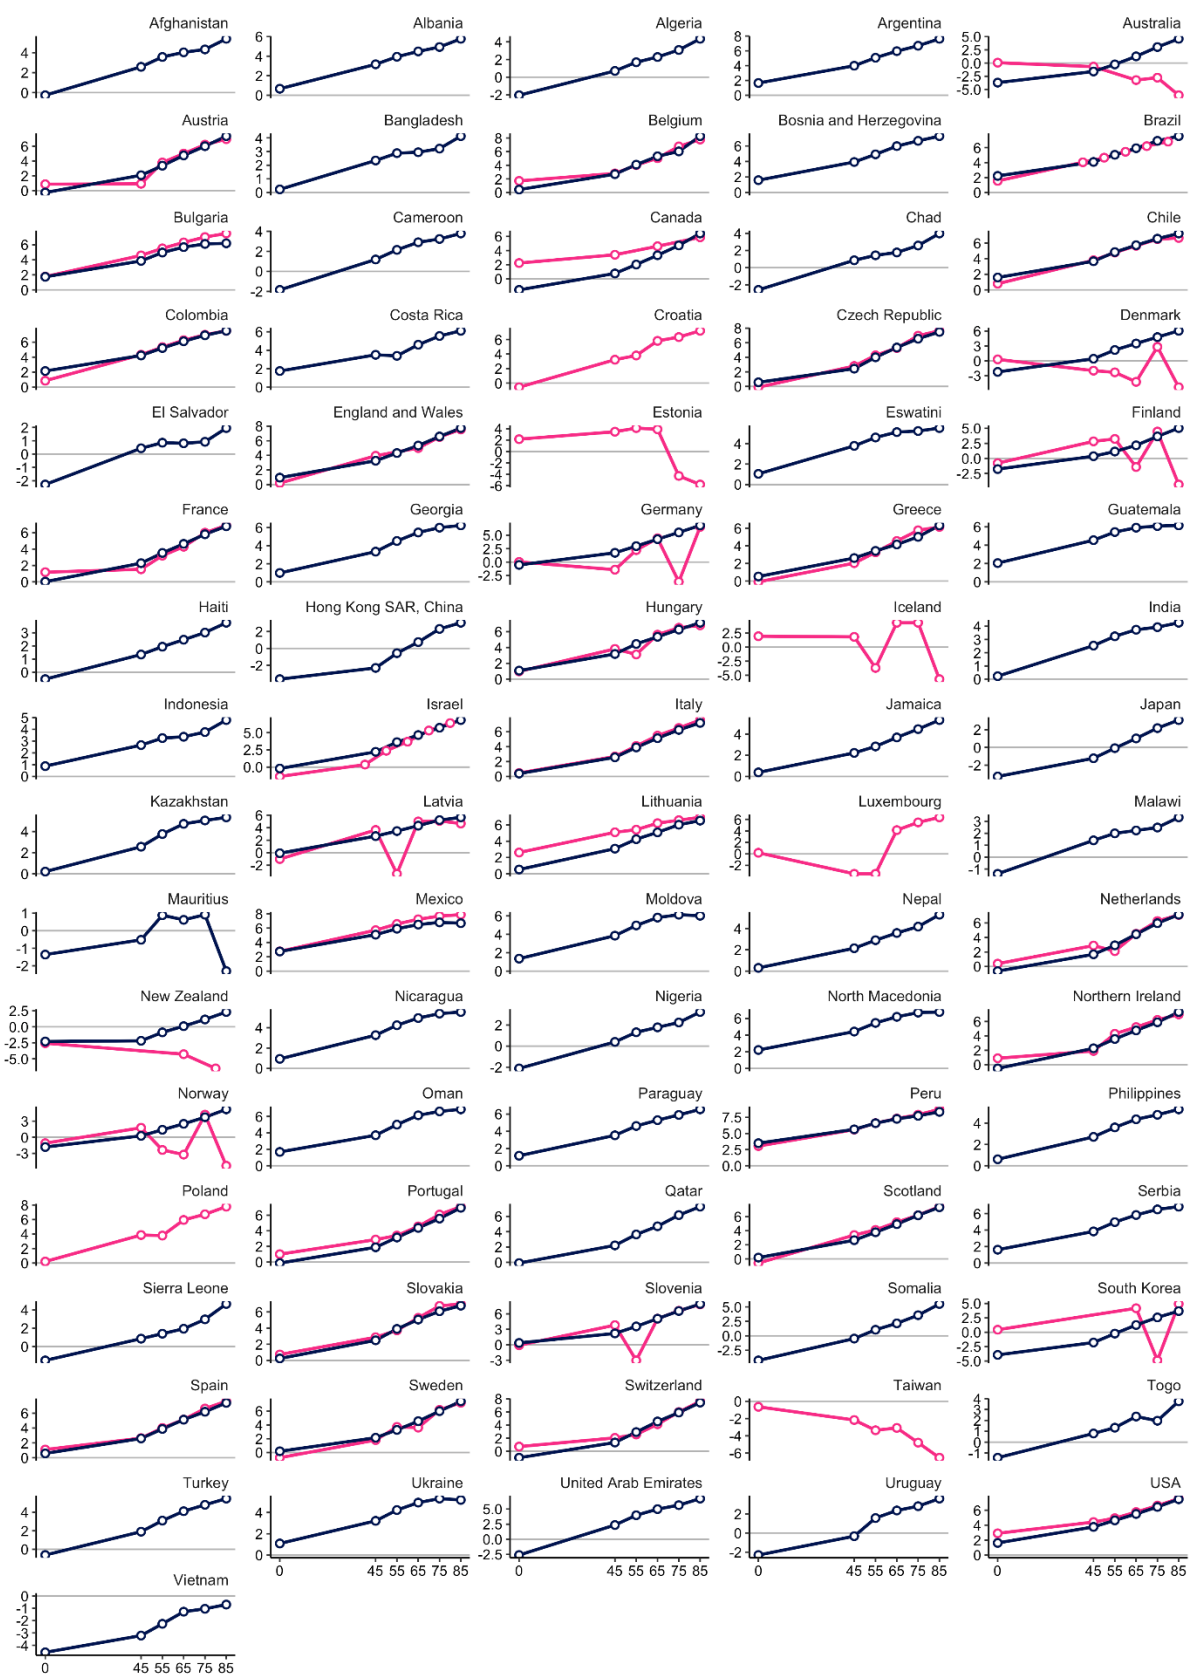

1  
2  
3 Note: Points are plotted at the start of each age group: 0-44,45-54,55-64,65-74,75-84, 85+  
4 Vertical axis labels are expressed as log (deaths/100,000 population).  
5

6 Figure 4: Official COVID-19 vs excess deaths by age group (per 100,000 population) [log  
7 scale]  
8  
9  
10  
11  
12  
13  
14  
15  
16  
17  
18  
19  
20  
21  
22  
23  
24  
25  
26  
27  
28  
29  
30  
31  
32  
33  
34  
35  
36  
37  
38  
39  
40  
41  
42  
43  
44  
45  
46  
47  
48  
49  
50  
51  
52  
53  
54  
55  
56  
57  
58  
59  
60

Log scale

○ Expected all-cause deaths ● Official COVID-19 deaths ○ Excess deaths



1  
2  
3  
4 Note: Points are plotted at the start of each age group: 0-44,45-54,55-64,65-74,75-84, 85+. Brazil has  
5 different age group categories. The excess mortality calculation for Chile is based on the first 52 weeks  
6 of the ISO calendar year and thus excludes the last 4 days of the calendar year.  
7

8  
9 Figure 5: Official COVID-19 vs excess deaths by age group, select Latin American countries  
10 and the United States (per 100,000 population)  
11  
12  
13  
14  
15  
16  
17  
18  
19  
20  
21  
22  
23  
24  
25  
26  
27  
28  
29  
30  
31  
32  
33  
34  
35  
36  
37  
38  
39  
40  
41  
42  
43  
44  
45  
46  
47  
48  
49  
50  
51  
52  
53  
54  
55  
56  
57  
58  
59  
60



Figure 6: Slope of the age-mortality curve vs GNI per capita, official COVID-19 deaths vs excess deaths, all data Poisson model (estimates use all age group and deaths recoded to 0 where they are negative)



Figure 7: Slope of the age-mortality curve vs GNI per capita, official COVID-19 deaths vs excess deaths common set of countries/economies. Poisson model (estimates use all age group and deaths recoded to 0 where they are negative)

## *Online Appendix*

### **Data Availability**

#### *Data sources*

Official reported COVID-19 deaths aggregated in the COVERAGE database (Output\_5.zip Version 395 downloaded May 16, 2022 from <https://osf.io/7tnfh/>). For this analysis the output file with death counts aggregated to 5-year age-groups is used <sup>[20]</sup>.

There are 125 countries in the COVERAGE database (excluding England and United Kingdom). For this analysis, the political units that make up the United Kingdom are treated separately as follows: England and Wales, Scotland, and Northern Ireland.

85 countries have at least one record of cumulative deaths during 2020.

76 countries have a record of cumulative deaths that covers at least 6 months since the first case was detected in the country (per case-data derived from Our World in Data). Countries with an “exposure” of less than 6 months as of the end of 2020 are excluded from the analysis.

The following is the set of 76 countries and economies with official reported deaths used in the analysis: Afghanistan; Albania; Algeria; Argentina; Australia; Austria; Bangladesh; Belgium; Bosnia and Herzegovina; Brazil; Bulgaria; Cameroon; Canada; Chad; Chile; Colombia; Costa Rica; Czech Republic; Denmark; El Salvador; England and Wales; Eswatini; Finland; France; Georgia; Germany; Greece; Guatemala; Haiti; Hong Kong SAR, China; Hungary; India; Indonesia; Israel; Italy; Jamaica; Japan; Jordan; Kazakhstan; Latvia; Lithuania; Malawi; Mauritius; Mexico; Moldova; Nepal; Netherlands; New Zealand; Nicaragua; Nigeria; North Macedonia; Northern Ireland; Norway; Oman; Paraguay; Peru; Philippines; Portugal;; Qatar; Scotland; Serbia; Sierra Leone; Slovak Republic; Slovenia; Somalia; Republic of Korea; Spain; Sweden; Switzerland; Togo; Turkey; Ukraine; United Arab Emirates; Uruguay; United States; Vietnam.

**Excess all-cause deaths from vital statistics records**, from the following sources:

Short term mortality fluctuations (STMF) harmonized data series from the Human Mortality Database <sup>[23]</sup>, downloaded February 18, 2022 from <https://www.mortality.org>

For Colombia, Peru, Mexico, Brazil and the USA all cause death data are sources from national statistical authorities.

- For this analysis, the STMF input files are used. These input files cover 38 countries and economies: Australia; Austria; Belgium; Bulgaria; Canada; Switzerland; Chile; Czech Republic; Germany; Denmark; Spain; Estonia; Finland; France; Northern Ireland; Scotland; England and Wales; Greece; Croatia; Hungary; Iceland; Israel; Italy; Republic of Korea; Lithuania; Luxembourg; Latvia; Netherlands; Norway; New Zealand; Poland; Portugal; Russian Federation; Slovak Republic; Slovenia; Sweden; Taiwan, China; United States.
- Russia does not have data for 2020.
- Chile and Germany do not have data for 2015.

Colombia vital statistics tabulations (*Defunciones no fetales*) were compiled by DANE. 2019 and 2020 tabulations are preliminary <sup>[24]</sup>.

Mexico vital statistics microdata are those compiled by INEGI (*Defunciones registradas, mortalidad general*) and cover 2015-2020 <sup>[25]</sup>.

Peru death certificate microdata were compiled by SINADEF <sup>[26]</sup> obtained through the government's open data portal. These data cover 2017-2021.

Brazil vital statistics tabulations are obtained from the Ministry of Health's Sistema de Informação sobre Mortalidade (SIM) data portal <sup>[27]</sup>  
<http://tabnet.datasus.gov.br/cgi/deftohtm.exe?sim/cnv/obt10uf.def>

Together there are 41 countries and economies with excess death estimates: Austria; Belgium; Brazil; Bulgaria; Switzerland; Chile; Czech Republic; Germany; Denmark; Spain; Estonia; Finland; France; Scotland; Greece; Croatia; Hungary; Iceland; Italy; Lithuania; Luxembourg; Latvia; Netherlands; Norway; Poland; Portugal; Slovak Republic; Slovenia; Sweden; Taiwan, Colombia; Peru; Mexico; England and Wales; United States; Australia; Canada; Israel; Republic of Korea; New Zealand.

Of these, four do not have corresponding official death records from the coverage database: Estonia, Croatia, Luxembourg, and Poland.



1  
2  
3 For all countries, the official COVID-19 death data is drawn from the COVerAGE database and  
4 the figures correspond to calendar year 2020. The excess mortality estimates are based  
5 principally on all-cause data compiled in the Short Term Mortality Fluctuations (STMF)  
6 database and reported in terms of deaths by week, using weeks as defined by the International  
7 Organization for Standardization (ISO) weeks. All ISO weeks start on a Monday and end on a  
8 Sunday and thus do not conform precisely to the calendar year. There are 52 ISO weeks in most  
9 years but 53 ISO weeks in 2015 and 2020. Including all 53 ISO weeks for 2020 in the excess  
10 mortality calculations would result in an overestimate of excess mortality. In order to ensure that  
11 the excess mortality calculations are based on an identical number of days in each year, we use  
12 the first 52 weeks of each year, excluding week 53 from the calculations for 2015 and 2020 for  
13 all cases where the data comes from STMF. The 52-week ISO year for 2020 thus starts  
14 December 30, 2019, and ends December 27, 2020. For the Brazil, Colombia, Mexico, Peru and  
15 United States excess mortality estimates, which are based on data sourced directly to national  
16 statistical agencies, we use the full calendar year.  
17  
18

19  
20  
21  
22  
23  
24  
25  
26  
27  
28 The preferred age group categories for the analyses conducted in this paper were as follows: 0-  
29 14, 15-44, 45-54, 55-64, 65-74, 75-84, 85+. However, since the reporting of all-cause deaths by  
30 age used by the Human Mortality Database is not consistent from country to country (not all  
31 countries report death counts tabulated at 5-year intervals or less), successively broader age-  
32 groupings are used in cases where the preferred age groups could not be constructed directly  
33 from the STMF input data. These countries include the United States, England and Wales,  
34 Australia, Canada, New Zealand, Israel and the Republic of Korea. We compute excess mortality  
35 rates for all unique country-age group combinations (as shown in Figure 4) but to estimate the  
36 age gradient of mortality, we only include countries for which we could construct the preferred  
37 age-group categories as described above. Countries for which we could not construct the  
38 preferred age-group categories are Brazil, Israel, and New Zealand. To avoid excluding the  
39 United States from this analysis, we use mortality data from the CDC which reports deaths for  
40 consistent age groups for 2015 through 2020.  
41  
42  
43  
44  
45  
46  
47  
48  
49  
50  
51  
52  
53  
54  
55  
56  
57  
58  
59  
60

Annex Table A1: Age Distribution of Official COVID-19 Deaths and Excess Deaths in 2020 (Data Shown in Figure 2)

| Country                | GNI per capita (PPP) | World Bank Income Group | Share (%) of official COVID-19 deaths by age group |       |       |       |       |     | Share (%) of excess mortality deaths by age group |       |       |       |       |     |  |
|------------------------|----------------------|-------------------------|----------------------------------------------------|-------|-------|-------|-------|-----|---------------------------------------------------|-------|-------|-------|-------|-----|--|
|                        |                      |                         | 0-44                                               | 45-54 | 55-64 | 65-74 | 75-84 | 85+ | 0-44                                              | 45-54 | 55-64 | 65-74 | 75-84 | 85+ |  |
| Bangladesh             | 5,180                | LMIC                    | 21                                                 | 25    | 27    | 13    | 9     | 6   |                                                   |       |       |       |       |     |  |
| India                  | 6,930                | LMIC                    | 13                                                 | 19    | 27    | 26    | 12    | 3   |                                                   |       |       |       |       |     |  |
| Guatemala              | 8,850                | UMIC                    | 14                                                 | 16    | 25    | 25    | 15    | 5   |                                                   |       |       |       |       |     |  |
| Philippines            | 10,220               | LMIC                    | 13                                                 | 14    | 24    | 28    | 16    | 6   |                                                   |       |       |       |       |     |  |
| Indonesia              | 11,940               | LMIC                    | 22                                                 | 22    | 28    | 15    | 9     | 4   |                                                   |       |       |       |       |     |  |
| Paraguay               | 12,760               | UMIC                    | 8                                                  | 9     | 22    | 27    | 23    | 11  |                                                   |       |       |       |       |     |  |
| Peru                   | 12,820               | UMIC                    | 8                                                  | 11    | 22    | 27    | 21    | 11  | 5                                                 | 10    | 20    | 26    | 23    | 15  |  |
| Ukraine                | 13,510               | LMIC                    | 4                                                  | 8     | 23    | 33    | 26    | 6   |                                                   |       |       |       |       |     |  |
| Moldova                | 14,280               | LMIC                    | 3                                                  | 8     | 26    | 38    | 20    | 5   |                                                   |       |       |       |       |     |  |
| Georgia                | 14,930               | UMIC                    | 2                                                  | 6     | 19    | 33    | 30    | 10  |                                                   |       |       |       |       |     |  |
| Brazil*                | 14,980               | UMIC                    | 7                                                  | 8     | 16    | 24    | 29    | 17  | 4                                                 | 10    | 15    | 23    | 26    | 22  |  |
| Colombia               | 15,320               | UMIC                    | 6                                                  | 8     | 18    | 26    | 26    | 16  | 2                                                 | 9     | 19    | 29    | 27    | 15  |  |
| Bosnia and Herzegovina | 15,700               | UMIC                    | 2                                                  | 5     | 16    | 32    | 32    | 13  |                                                   |       |       |       |       |     |  |
| North Macedonia        | 16,740               | UMIC                    | 4                                                  | 9     | 22    | 34    | 26    | 6   |                                                   |       |       |       |       |     |  |
| Serbia                 | 17,810               | UMIC                    | 2                                                  | 5     | 15    | 35    | 30    | 12  |                                                   |       |       |       |       |     |  |
| Mexico                 | 19,290               | UMIC                    | 10                                                 | 16    | 26    | 27    | 17    | 5   | 5                                                 | 15    | 25    | 28    | 20    | 8   |  |
| Argentina              | 22,090               | UMIC                    | 4                                                  | 6     | 14    | 25    | 28    | 25  |                                                   |       |       |       |       |     |  |
| Bulgaria               | 23,810               | UMIC                    | 3                                                  | 6     | 18    | 35    | 29    | 9   | 1                                                 | 6     | 14    | 30    | 33    | 15  |  |
| Kazakhstan             | 24,040               | UMIC                    | 5                                                  | 9     | 25    | 34    | 22    | 6   |                                                   |       |       |       |       |     |  |
| Chile                  | 24,480               | HIC                     | 4                                                  | 6     | 16    | 25    | 29    | 21  | 2                                                 | 8     | 18    | 27    | 32    | 14  |  |
| Turkey                 | 26,410               | UMIC                    | 3                                                  | 7     | 17    | 30    | 28    | 15  |                                                   |       |       |       |       |     |  |
| Greece                 | 30,080               | HIC                     | 2                                                  | 5     | 9     | 15    | 25    | 45  | 1                                                 | 2     | 6     | 18    | 43    | 31  |  |
| Slovakia               | 31,410               | HIC                     | 1                                                  | 3     | 11    | 28    | 36    | 22  | 0                                                 | 3     | 6     | 24    | 48    | 19  |  |
| Hungary                | 32,630               | HIC                     | 2                                                  | 4     | 11    | 25    | 34    | 25  | 1                                                 | 7     | 3     | 32    | 40    | 17  |  |
| Portugal               | 35,230               | HIC                     | 1                                                  | 2     | 5     | 14    | 30    | 50  | 1                                                 | 3     | 4     | 12    | 37    | 42  |  |

1  
2  
3  
4  
5  
6  
7  
8  
9  
10  
11  
12  
13  
14  
15  
16  
17  
18  
19  
20  
21  
22  
23  
24  
25  
26  
27  
28  
29  
30  
31  
32  
33  
34  
35  
36  
37  
38  
39  
40  
41  
42  
43  
44  
45  
46  
47  
48  
49  
50  
51  
52  
53  
54  
55  
56  
57  
58  
59  
60

|                   |        |     |   |   |    |    |    |    |   |    |    |    |    |    |
|-------------------|--------|-----|---|---|----|----|----|----|---|----|----|----|----|----|
| Lithuania         | 37,200 | HIC | 1 | 4 | 13 | 20 | 36 | 27 | 3 | 11 | 17 | 25 | 26 | 17 |
| Israel*           | 39,780 | HIC | 2 | 3 | 8  | 21 | 28 | 39 | 0 | 1  | 3  | 10 | 32 | 54 |
| Scotland          | 40,000 | HIC | 1 | 2 | 7  | 17 | 34 | 40 | 0 | 4  | 8  | 19 | 30 | 38 |
| Slovenia          | 40,060 | HIC | 1 | 1 | 3  | 12 | 33 | 50 | 0 | 5  | 0  | 13 | 35 | 48 |
| Czech Republic    | 40,260 | HIC | 1 | 2 | 6  | 23 | 38 | 31 | 0 | 2  | 6  | 17 | 46 | 29 |
| Spain             | 41,790 | HIC | 1 | 2 | 6  | 14 | 28 | 49 | 1 | 2  | 5  | 11 | 34 | 47 |
| Japan             | 44,260 | HIC | 1 | 2 | 5  | 16 | 35 | 42 |   |    |    |    |    |    |
| Italy             | 44,720 | HIC | 1 | 2 | 6  | 16 | 35 | 41 | 0 | 1  | 5  | 17 | 33 | 43 |
| England and Wales | 47,880 | HIC | 1 | 3 | 7  | 15 | 33 | 42 |   |    |    |    |    |    |
| Canada            | 48,670 | HIC | 1 | 1 | 4  | 12 | 25 | 57 |   |    |    |    |    |    |
| France            | 50,130 | HIC | 1 | 2 | 6  | 17 | 30 | 44 | 0 | 1  | 4  | 12 | 35 | 48 |
| Belgium           | 54,790 | HIC | 1 | 1 | 5  | 12 | 15 | 67 | 0 | 2  | 5  | 11 | 36 | 47 |
| Sweden            | 56,190 | HIC | 1 | 1 | 4  | 12 | 32 | 50 | 0 | 1  | 6  | 5  | 43 | 45 |
| Germany           | 57,460 | HIC | 1 | 1 | 5  | 12 | 34 | 47 | 2 | 0  | 4  | 27 | 0  | 67 |
| Austria           | 57,870 | HIC | 1 | 1 | 5  | 13 | 34 | 47 | 2 | 0  | 8  | 17 | 42 | 31 |
| Netherlands       | 59,250 | HIC | 0 | 1 | 4  | 15 | 37 | 44 | 1 | 3  | 2  | 14 | 43 | 37 |
| USA               | 66,120 | HIC | 3 | 5 | 12 | 21 | 28 | 32 | 7 | 7  | 12 | 21 | 25 | 27 |
| Switzerland       | 69,440 | HIC | 0 | 1 | 3  | 12 | 29 | 55 | 1 | 1  | 2  | 7  | 29 | 60 |

\* The age groups available to compute excess deaths for Brazil differ from those used in other countries and correspond to the following: 0-39, 40-49, 50-59, 60-69, 70-79, 80+. GNI is from 2019.

Annex Table A2: Hypothetical Age Distribution of Official COVID-19 and Excess Deaths in 2020, Using Country Age-Specific Mortality Rates and the US Population Age Distribution (Data Shown in Figure 3)

| Country                | GNI per capita (PPP) | World Bank Income Group | Share (%) of official COVID-19 deaths by age group |       |       |       |       |     | Share (%) of excess mortality deaths by age group |       |       |       |       |     |  |
|------------------------|----------------------|-------------------------|----------------------------------------------------|-------|-------|-------|-------|-----|---------------------------------------------------|-------|-------|-------|-------|-----|--|
|                        |                      |                         | 0-44                                               | 45-54 | 55-64 | 65-74 | 75-84 | 85+ | 0-44                                              | 45-54 | 55-64 | 65-74 | 75-84 | 85+ |  |
| Bangladesh             | 5,180                | LMIC                    | 21                                                 | 25    | 27    | 13    | 9     | 6   |                                                   |       |       |       |       |     |  |
| India                  | 6,930                | LMIC                    | 13                                                 | 19    | 27    | 26    | 12    | 3   |                                                   |       |       |       |       |     |  |
| Guatemala              | 8,850                | UMIC                    | 14                                                 | 16    | 25    | 25    | 15    | 5   |                                                   |       |       |       |       |     |  |
| Philippines            | 10,220               | LMIC                    | 13                                                 | 14    | 24    | 28    | 16    | 6   |                                                   |       |       |       |       |     |  |
| Indonesia              | 11,940               | LMIC                    | 22                                                 | 22    | 28    | 15    | 9     | 4   |                                                   |       |       |       |       |     |  |
| Paraguay               | 12,760               | UMIC                    | 8                                                  | 9     | 22    | 27    | 23    | 11  |                                                   |       |       |       |       |     |  |
| Peru                   | 12,820               | UMIC                    | 8                                                  | 11    | 22    | 27    | 21    | 11  | 5                                                 | 10    | 20    | 26    | 23    | 15  |  |
| Ukraine                | 13,510               | LMIC                    | 4                                                  | 8     | 23    | 33    | 26    | 6   |                                                   |       |       |       |       |     |  |
| Moldova                | 14,280               | LMIC                    | 3                                                  | 8     | 26    | 38    | 20    | 5   |                                                   |       |       |       |       |     |  |
| Georgia                | 14,930               | UMIC                    | 2                                                  | 6     | 19    | 33    | 30    | 10  |                                                   |       |       |       |       |     |  |
| Brazil*                | 14,980               | UMIC                    | 7                                                  | 8     | 16    | 24    | 29    | 17  | 4                                                 | 10    | 15    | 23    | 26    | 22  |  |
| Colombia               | 15,320               | UMIC                    | 6                                                  | 8     | 18    | 26    | 26    | 16  | 2                                                 | 9     | 19    | 29    | 27    | 15  |  |
| Bosnia and Herzegovina | 15,700               | UMIC                    | 2                                                  | 5     | 16    | 32    | 32    | 13  |                                                   |       |       |       |       |     |  |
| North Macedonia        | 16,740               | UMIC                    | 4                                                  | 9     | 22    | 34    | 26    | 6   |                                                   |       |       |       |       |     |  |
| Serbia                 | 17,810               | UMIC                    | 2                                                  | 5     | 15    | 35    | 30    | 12  |                                                   |       |       |       |       |     |  |
| Mexico                 | 19,290               | UMIC                    | 10                                                 | 16    | 26    | 27    | 17    | 5   | 5                                                 | 15    | 25    | 28    | 20    | 8   |  |
| Argentina              | 22,090               | UMIC                    | 4                                                  | 6     | 14    | 25    | 28    | 25  |                                                   |       |       |       |       |     |  |
| Bulgaria               | 23,810               | UMIC                    | 3                                                  | 6     | 18    | 35    | 29    | 9   | 1                                                 | 6     | 14    | 30    | 33    | 15  |  |
| Kazakhstan             | 24,040               | UMIC                    | 5                                                  | 9     | 25    | 34    | 22    | 6   |                                                   |       |       |       |       |     |  |
| Chile                  | 24,480               | HIC                     | 4                                                  | 6     | 16    | 25    | 29    | 21  | 2                                                 | 8     | 18    | 27    | 32    | 14  |  |
| Turkey                 | 26,410               | UMIC                    | 3                                                  | 7     | 17    | 30    | 28    | 15  |                                                   |       |       |       |       |     |  |
| Greece                 | 30,080               | HIC                     | 2                                                  | 5     | 9     | 15    | 25    | 45  | 1                                                 | 2     | 6     | 18    | 43    | 31  |  |
| Slovakia               | 31,410               | HIC                     | 1                                                  | 3     | 11    | 28    | 36    | 22  | 0                                                 | 3     | 6     | 24    | 48    | 19  |  |

1  
2  
3  
4  
5  
6  
7  
8  
9  
10  
11  
12  
13  
14  
15  
16  
17  
18  
19  
20  
21  
22  
23  
24  
25  
26  
27  
28  
29  
30  
31  
32  
33  
34  
35  
36  
37  
38  
39  
40  
41  
42  
43  
44  
45  
46  
47  
48  
49  
50  
51  
52  
53  
54  
55  
56  
57  
58  
59  
60

|                   |        |     |   |   |    |    |    |    |   |    |    |    |    |    |
|-------------------|--------|-----|---|---|----|----|----|----|---|----|----|----|----|----|
| Hungary           | 32,630 | HIC | 2 | 4 | 11 | 25 | 34 | 25 | 1 | 7  | 3  | 32 | 40 | 17 |
| Portugal          | 35,230 | HIC | 1 | 2 | 5  | 14 | 30 | 50 | 1 | 3  | 4  | 12 | 37 | 42 |
| Lithuania         | 37,200 | HIC | 1 | 4 | 13 | 20 | 36 | 27 | 3 | 11 | 17 | 25 | 26 | 17 |
| Israel*           | 39,780 | HIC | 2 | 3 | 8  | 21 | 28 | 39 | 0 | 1  | 3  | 10 | 32 | 54 |
| Scotland          | 40,000 | HIC | 1 | 2 | 7  | 17 | 34 | 40 | 0 | 4  | 8  | 19 | 30 | 38 |
| Slovenia          | 40,060 | HIC | 1 | 1 | 3  | 12 | 33 | 50 | 0 | 5  | 0  | 13 | 35 | 48 |
| Czech Republic    | 40,260 | HIC | 1 | 2 | 6  | 23 | 38 | 31 | 0 | 2  | 6  | 17 | 46 | 29 |
| Spain             | 41,790 | HIC | 1 | 2 | 6  | 14 | 28 | 49 | 1 | 2  | 5  | 11 | 34 | 47 |
| Japan             | 44,260 | HIC | 1 | 2 | 5  | 16 | 35 | 42 |   |    |    |    |    |    |
| Italy             | 44,720 | HIC | 1 | 2 | 6  | 16 | 35 | 41 | 0 | 1  | 5  | 17 | 33 | 43 |
| England and Wales | 47,880 | HIC | 1 | 3 | 7  | 15 | 33 | 42 |   |    |    |    |    |    |
| Canada            | 48,670 | HIC | 1 | 1 | 4  | 12 | 25 | 57 |   |    |    |    |    |    |
| France            | 50,130 | HIC | 1 | 2 | 6  | 17 | 30 | 44 | 0 | 1  | 4  | 12 | 35 | 48 |
| Belgium           | 54,790 | HIC | 1 | 1 | 5  | 12 | 15 | 67 | 0 | 2  | 5  | 11 | 36 | 47 |
| Sweden            | 56,190 | HIC | 1 | 1 | 4  | 12 | 32 | 50 | 0 | 1  | 6  | 5  | 43 | 45 |
| Germany           | 57,460 | HIC | 1 | 1 | 5  | 12 | 34 | 47 | 2 | 0  | 4  | 27 | 0  | 67 |
| Austria           | 57,870 | HIC | 1 | 1 | 5  | 13 | 34 | 47 | 2 | 0  | 8  | 17 | 42 | 31 |
| Netherlands       | 59,250 | HIC | 0 | 1 | 4  | 15 | 37 | 44 | 1 | 3  | 2  | 14 | 43 | 37 |
| USA               | 66,120 | HIC | 3 | 5 | 12 | 21 | 28 | 32 | 7 | 7  | 12 | 21 | 25 | 27 |
| Switzerland       | 69,440 | HIC | 0 | 1 | 3  | 12 | 29 | 55 | 1 | 1  | 2  | 7  | 29 | 60 |

\* The age groups available to compute excess deaths for Brazil differ from those used in other countries and correspond to the following: 0-39, 40-49, 50-59, 60-69, 70-79, 80+. GNI is from 2019.

Annex Table A3: Rate of Increase in Risk of Death by Age and Ratio of Mortality Risk Between Age Groups

| Country                | Official deaths                                                    |                            | Excess deaths                                                      |                            |
|------------------------|--------------------------------------------------------------------|----------------------------|--------------------------------------------------------------------|----------------------------|
|                        | Exponential rate of increase in risk of death for each year of age | Ratio (MR 75-84/ MR 45-54) | Exponential rate of increase in risk of death for each year of age | Ratio (MR 75-84/ MR 45-54) |
| Afghanistan            | 0.06                                                               | 5.74                       |                                                                    |                            |
| Albania                | 0.06                                                               | 5.88                       |                                                                    |                            |
| Algeria                | 0.08                                                               | 10.72                      |                                                                    |                            |
| Argentina              | 0.08                                                               | 14.89                      |                                                                    |                            |
| Australia              | 0.16                                                               | 103.71                     |                                                                    |                            |
| Austria                | 0.13                                                               | 50.11                      | 0.10                                                               | 195.28                     |
| Bangladesh             | 0.04                                                               | 2.39                       |                                                                    |                            |
| Belgium                | 0.15                                                               | 28.08                      | 0.13                                                               | 52.81                      |
| Bosnia and Herzegovina | 0.08                                                               | 15.22                      |                                                                    |                            |
| Brazil                 | 0.07                                                               | 16.70                      |                                                                    |                            |
| Bulgaria               | 0.06                                                               | 9.59                       | 0.07                                                               | 11.48                      |
| Cameroon               | 0.07                                                               | 7.73                       |                                                                    |                            |
| Cada                   | 0.15                                                               | 52.78                      |                                                                    |                            |
| Chad                   | 0.07                                                               | 5.58                       |                                                                    |                            |
| Chile                  | 0.08                                                               | 17.96                      | 0.07                                                               | 14.85                      |
| Colombia               | 0.07                                                               | 14.63                      | 0.08                                                               | 14.24                      |
| Costa Rica             | 0.05                                                               | 7.67                       |                                                                    |                            |
| Croatia                |                                                                    |                            | 0.10                                                               | 22.54                      |
| Czech Republic         | 0.11                                                               | 61.17                      | 0.12                                                               | 64.18                      |
| Denmark                | 0.13                                                               | 78.46                      | 0.02                                                               | -2.31                      |
| El Salvador            | 0.05                                                               | 1.62                       |                                                                    |                            |
| England and Wales      | 0.11                                                               | 27.90                      |                                                                    |                            |
| Estonia                |                                                                    |                            | 0.02                                                               | -2.26                      |
| Eswatini               | 0.06                                                               | 4.26                       |                                                                    |                            |
| Finland                | 0.12                                                               | 26.90                      | 0.05                                                               | 5.10                       |
| France                 | 0.10                                                               | 34.25                      | 0.12                                                               | 87.28                      |
| Georgia                | 0.07                                                               | 14.21                      |                                                                    |                            |
| Germany                | 0.12                                                               | 44.66                      | 0.13                                                               | -164.35                    |
| Greece                 | 0.09                                                               | 11.09                      | 0.09                                                               | 41.67                      |
| Guatemala              | 0.05                                                               | 4.66                       |                                                                    |                            |
| Haiti                  | 0.05                                                               | 5.29                       |                                                                    |                            |
| Hong Kong SAR, China   | 0.12                                                               |                            |                                                                    |                            |
| Hungary                | 0.09                                                               | 21.90                      | 0.08                                                               | 14.44                      |
| Iceland                |                                                                    |                            | 0.03                                                               | 12.27                      |
| India                  | 0.05                                                               | 4.03                       |                                                                    |                            |

|    |                      |      |       |      |       |
|----|----------------------|------|-------|------|-------|
| 1  |                      |      |       |      |       |
| 2  |                      |      |       |      |       |
| 3  | Indonesia            | 0.04 | 3.02  |      |       |
| 4  | Israel               | 0.10 | 32.91 |      |       |
| 5  | Italy                | 0.10 | 39.76 | 0.11 | 46.03 |
| 6  | Jamaica              | 0.06 | 9.42  |      |       |
| 7  | Japan                | 0.10 | 29.85 |      |       |
| 8  | Kazakhstan           | 0.07 | 12.00 |      |       |
| 9  | Latvia               | 0.07 | 12.95 | 0.06 | 4.29  |
| 10 | Lithuania            | 0.08 | 18.85 | 0.05 | 4.42  |
| 11 | Luxembourg           |      |       | 0.12 | -7.52 |
| 12 | Malawi               | 0.06 | 2.93  |      |       |
| 13 | Mauritius            | 0.03 | 4.19  |      |       |
| 14 | Mexico               | 0.05 | 5.53  | 0.06 | 7.13  |
| 15 | Moldova              | 0.06 | 9.75  |      |       |
| 16 | Nepal                | 0.05 | 7.62  |      |       |
| 17 | Netherlands          | 0.13 | 72.86 | 0.12 | 29.32 |
| 18 | New Zealand          | 0.11 | 28.02 |      |       |
| 19 | Nicaragua            | 0.06 | 8.32  |      |       |
| 20 | Nigeria              | 0.06 | 6.32  |      |       |
| 21 | North Macedonia      | 0.06 | 9.73  |      |       |
| 22 | Northern Ireland     | 0.12 | 37.00 | 0.10 | 74.72 |
| 23 | Norway               | 0.12 | 32.03 | 0.06 | 11.47 |
| 24 | Oman                 | 0.07 | 18.21 |      |       |
| 25 | Paraguay             | 0.07 | 10.69 |      |       |
| 26 | Peru                 | 0.06 | 8.17  | 0.07 | 10.09 |
| 27 | Philippines          | 0.06 | 7.94  |      |       |
| 28 | Poland               |      |       | 0.10 | 17.50 |
| 29 | Portugal             | 0.12 | 39.63 | 0.11 | 24.73 |
| 30 | Qatar                | 0.10 | 52.10 |      |       |
| 31 | Scotland             | 0.11 | 34.29 | 0.11 | 16.75 |
| 32 | Serbia               | 0.07 | 14.42 |      |       |
| 33 | Sierra Leone         | 0.06 | 8.29  |      |       |
| 34 | Slovakia             | 0.09 | 36.46 | 0.11 | 48.40 |
| 35 | Slovenia             | 0.14 | 78.16 | 0.13 | 16.23 |
| 36 | Somalia              | 0.14 | 56.77 |      |       |
| 37 | South Korea          | 0.13 | 78.62 |      |       |
| 38 | Spain                | 0.11 | 36.59 | 0.11 | 54.12 |
| 39 | Sweden               | 0.13 | 47.08 | 0.13 | 79.55 |
| 40 | Switzerland          | 0.15 | 96.99 | 0.15 | 51.80 |
| 41 | Taiwan               |      |       | 0.04 | 13.73 |
| 42 | Togo                 | 0.05 | 3.22  |      |       |
| 43 | Turkey               | 0.08 | 18.27 |      |       |
| 44 | Ukraine              | 0.05 | 8.09  |      |       |
| 45 | United Arab Emirates | 0.11 | 26.72 |      |       |
| 46 | Uruguay              | 0.08 | 23.17 |      |       |
| 47 | USA                  | 0.08 | 14.50 | 0.06 | 9.07  |
| 48 | Vietnam              | 0.05 | 8.74  |      |       |

1  
2  
3  
4  
5  
6  
7  
8  
9  
10  
11  
12  
13  
14  
15  
16  
17  
18  
19  
20  
21  
22  
23  
24  
25  
26  
27  
28  
29  
30  
31  
32  
33  
34  
35  
36  
37  
38  
39  
40  
41  
42  
43  
44  
45  
46  
47  
48  
49  
50  
51  
52  
53  
54  
55  
56  
57  
58  
59  
60

For peer review only



1  
2  
3  
4  
5  
6  
7  
8  
9  
10  
11  
12  
13  
14  
15  
16  
17  
18  
19  
20  
21  
22  
23  
24  
25  
26  
27  
28  
29  
30  
31  
32  
33  
34  
35  
36  
37  
38  
39  
40  
41  
42  
43  
44  
45  
46  
47  
48  
49  
50  
51  
52  
53  
54  
55  
56  
57  
58  
59  
60

## STROBE Statement—checklist of items that should be included in reports of observational studies

|                              | Item No | Recommendation                                                                                                                                                                                                                                                                                                                                                                                                                                                                                                                                                                                                                                                                                               |
|------------------------------|---------|--------------------------------------------------------------------------------------------------------------------------------------------------------------------------------------------------------------------------------------------------------------------------------------------------------------------------------------------------------------------------------------------------------------------------------------------------------------------------------------------------------------------------------------------------------------------------------------------------------------------------------------------------------------------------------------------------------------|
| <b>Title and abstract</b>    | 1       | (a) Indicate the study's design with a commonly used term in the title or the abstract<br><b>Yes, in title</b><br>(b) Provide in the abstract an informative and balanced summary of what was done and what was found. <b>Yes, in abstract</b>                                                                                                                                                                                                                                                                                                                                                                                                                                                               |
| <b>Introduction</b>          |         |                                                                                                                                                                                                                                                                                                                                                                                                                                                                                                                                                                                                                                                                                                              |
| Background/rationale         | 2       | Explain the scientific background and rationale for the investigation being reported. <b>P. 3</b>                                                                                                                                                                                                                                                                                                                                                                                                                                                                                                                                                                                                            |
| Objectives                   | 3       | State specific objectives, including any prespecified hypotheses. <b>P. 3</b>                                                                                                                                                                                                                                                                                                                                                                                                                                                                                                                                                                                                                                |
| <b>Methods</b>               |         |                                                                                                                                                                                                                                                                                                                                                                                                                                                                                                                                                                                                                                                                                                              |
| Study design                 | 4       | Present key elements of study design early in the paper. <b>P 3-4</b>                                                                                                                                                                                                                                                                                                                                                                                                                                                                                                                                                                                                                                        |
| Setting                      | 5       | Describe the setting, locations, and relevant dates, including periods of recruitment, exposure, follow-up, and data collection <b>P. 4</b>                                                                                                                                                                                                                                                                                                                                                                                                                                                                                                                                                                  |
| Participants                 | 6       | (a) <i>Cohort study</i> —Give the eligibility criteria, and the sources and methods of selection of participants. Describe methods of follow-up<br><i>Case-control study</i> —Give the eligibility criteria, and the sources and methods of case ascertainment and control selection. Give the rationale for the choice of cases and controls<br><i>Cross-sectional study</i> —Give the eligibility criteria, and the sources and methods of selection of participants <b>P. 4</b><br>(b) <i>Cohort study</i> —For matched studies, give matching criteria and number of exposed and unexposed<br><i>Case-control study</i> —For matched studies, give matching criteria and the number of controls per case |
| Variables                    | 7       | Clearly define all outcomes, exposures, predictors, potential confounders, and effect modifiers. Give diagnostic criteria, if applicable <b>P 4-5</b> .                                                                                                                                                                                                                                                                                                                                                                                                                                                                                                                                                      |
| Data sources/<br>measurement | 8*      | For each variable of interest, give sources of data and details of methods of assessment (measurement). Describe comparability of assessment methods if there is more than one group <b>P. 4</b>                                                                                                                                                                                                                                                                                                                                                                                                                                                                                                             |
| Bias                         | 9       | Describe any efforts to address potential sources of bias <b>P. 4-5</b>                                                                                                                                                                                                                                                                                                                                                                                                                                                                                                                                                                                                                                      |
| Study size                   | 10      | Explain how the study size was arrived at <b>P 4</b> .                                                                                                                                                                                                                                                                                                                                                                                                                                                                                                                                                                                                                                                       |
| Quantitative variables       | 11      | Explain how quantitative variables were handled in the analyses. If applicable, describe which groupings were chosen and why <b>P. 4-6</b>                                                                                                                                                                                                                                                                                                                                                                                                                                                                                                                                                                   |
| Statistical methods          | 12      | (a) Describe all statistical methods, including those used to control for confounding <b>P. 4-6</b><br>(b) Describe any methods used to examine subgroups and interactions <b>P. 4-6</b><br>(c) Explain how missing data were addressed<br>(d) <i>Cohort study</i> —If applicable, explain how loss to follow-up was addressed<br><i>Case-control study</i> —If applicable, explain how matching of cases and controls was addressed<br><i>Cross-sectional study</i> —If applicable, describe analytical methods taking account of sampling strategy <b>P. 6</b><br>(e) Describe any sensitivity analyses. <b>Figure 3, Figure 7, P. 7 and 9.</b>                                                            |

Continued on next page

| <b>Results</b>           |     |                                                                                                                                                                                                                                                                                                                                                                                                                                 |
|--------------------------|-----|---------------------------------------------------------------------------------------------------------------------------------------------------------------------------------------------------------------------------------------------------------------------------------------------------------------------------------------------------------------------------------------------------------------------------------|
| Participants             | 13* | (a) Report numbers of individuals at each stage of study—eg numbers potentially eligible, examined for eligibility, confirmed eligible, included in the study, completing follow-up, and analysed. <b>Not applicable as the unit of analysis is the country.</b><br>(b) Give reasons for non-participation at each stage<br>(c) Consider use of a flow diagram                                                                  |
| Descriptive data         | 14* | (a) Give characteristics of study participants (eg demographic, clinical, social) and information on exposures and potential confounders. <b>Countries are classified by income level.</b><br>(b) Indicate number of participants with missing data for each variable of interest<br>(c) <i>Cohort study</i> —Summarise follow-up time (eg, average and total amount) N.A.                                                      |
| Outcome data             | 15* | <i>Cohort study</i> —Report numbers of outcome events or summary measures over time<br><i>Case-control study</i> —Report numbers in each exposure category, or summary measures of exposure<br><i>Cross-sectional study</i> —Report numbers of outcome events or summary measures <b>P. 6-9.</b>                                                                                                                                |
| Main results             | 16  | (a) Give unadjusted estimates and, if applicable, confounder-adjusted estimates and their precision (eg, 95% confidence interval). Make clear which confounders were adjusted for and why they were included. Figures 2 and 3.<br>(b) Report category boundaries when continuous variables were categorized<br>(c) If relevant, consider translating estimates of relative risk into absolute risk for a meaningful time period |
| Other analyses           | 17  | Report other analyses done—eg analyses of subgroups and interactions, and sensitivity analyses <b>Figure 3, Figure 7, P. 7 and 9.</b>                                                                                                                                                                                                                                                                                           |
| <b>Discussion</b>        |     |                                                                                                                                                                                                                                                                                                                                                                                                                                 |
| Key results              | 18  | Summarise key results with reference to study objectives <b>P. 9-10</b>                                                                                                                                                                                                                                                                                                                                                         |
| Limitations              | 19  | Discuss limitations of the study, taking into account sources of potential bias or imprecision. Discuss both direction and magnitude of any potential bias <b>P. 10</b>                                                                                                                                                                                                                                                         |
| Interpretation           | 20  | Give a cautious overall interpretation of results considering objectives, limitations, multiplicity of analyses, results from similar studies, and other relevant evidence <b>P. 10-12</b>                                                                                                                                                                                                                                      |
| Generalisability         | 21  | Discuss the generalisability (external validity) of the study results <b>P. 10</b>                                                                                                                                                                                                                                                                                                                                              |
| <b>Other information</b> |     |                                                                                                                                                                                                                                                                                                                                                                                                                                 |
| Funding                  | 22  | Give the source of funding and the role of the funders for the present study and, if applicable, for the original study on which the present article is based. <b>No funding to report.</b>                                                                                                                                                                                                                                     |

\*Give information separately for cases and controls in case-control studies and, if applicable, for exposed and unexposed groups in cohort and cross-sectional studies.

**Note:** An Explanation and Elaboration article discusses each checklist item and gives methodological background and published examples of transparent reporting. The STROBE checklist is best used in conjunction with this article (freely available on the Web sites of PLoS Medicine at <http://www.plosmedicine.org/>, Annals of Internal Medicine at <http://www.annals.org/>, and Epidemiology at <http://www.epidem.com/>). Information on the STROBE Initiative is available at [www.strobe-statement.org](http://www.strobe-statement.org).
